# Supplementary material
Source: publisher figshare collection journal article supplement (https://iop.figshare.com/ndownloader/files/18501485)
Supplement: Supplementary file 1 [file 18501485]

## Sheet: ESA+Attitudes+and+Predictors_Se
Partic #	Random	Education	EduNum	Politics	HES1	HES2	HES3	HES4	HES5	HES6	HES7	HES8	HES9	HES10	HES11	HES12	HES13	HES14	HES15	HES16	HES17	HES18	HESKnow	AR1	AR2	AR3	AcceptableRisk	MFQ1	MFQ2	MFQ3	MFQ4	MFQ5	MFQ6	MFQ7	MFQ8	MFQ9	MFQ10	MFQ11	MFQ12	MFQ13	MFQ14	MFQ15	MFQ16	BNT1	BNT2	BNT3	BNT4	BNT5	BNT6
1032	1	Less than high school diploma	1	3	1	0	1	0	0	0	1	0	0	0	0	0	0	0	1	0	0	1	5	20	40	15	25	3	4	4	3	4	4	4	4	3	3	3	3	2	4	4	4	0	1	1	0	0	0
143	2	Less than high school diploma	1	1	0	0	0	0	0	0	0	0	0	0	0	0	0	0	0	0	0	0	0	20	10	40	23.3333	4	5	6	6	6	6	6	5	6	4	5	5	6	6	5	5	1	0	0	0	0	0
1003	2	Bachelor's degree	2	2	1	0	0	1	0	1	0	1	1	0	1	1	0	1	0	1	1	1	11	1	1	1	1	1	4	4	1	4	1	4	4	1	4	1	4	4	4	1	1	1	0	0	0	0	0
429	1	Less than high school diploma	1	4	0	0	0	0	0	0	0	1	0	0	1	0	0	0	0	0	0	0	2	60	60	40	53.3333	3	3	4	4	3	3	3	4	3	3	2	3	5	4	3	3	0	1	0	0	0	0
19	2	Less than high school diploma	1	7	0	0	0	0	0	1	0	0	0	0	0	1	0	1	0	0	0	1	4	50	70	100	73.3333	1	1	1	1	1	1	1	1	1	1	1	1	1	1	1	1	0	0	0	0	0	0
119	1	Less than high school diploma	1	4	0	0	1	1	0	0	0	1	0	0	0	0	0	1	0	0	1	1	6	0	0	1	0.333333	4	4	4	4	4	4	4	4	4	4	4	4	3	4	4	4	0	0	0	0	0	0
304	2	Less than high school diploma	1	1	0	0	0	0	0	0	0	1	0	0	0	0	1	1	1	1	0	0	5	40	50	30	40	2	5	4	4	5	5	5	3	2	5	5	4	4	4	2	4	1	0	0	0	0	0
900	1	Less than high school diploma	1	4	1	0	1	1	1	0	0	1	1	0	1	1	0	1	0	0	0	0	9	10	1	35	15.3333	3	4	3	2	5	3	3	6	6	5	3	3	5	2	6	6	1	0	0	0	0	0
5	1	Less than high school diploma	1	4	0	0	0	0	0	0	0	0	0	0	0	1	0	0	0	0	0	0	1	0	5	0	1.66667	4	4	3	3	4	4	4	4	4	4	4	4	4	4	4	4	0	0	0	0	0	0
588	1	High school diploma or GED	1	6	0	0	0	1	0	0	0	0	1	0	1	0	1	1	0	1	1	0	7	0	0	0	0	1	4	5	1	1	1	1	2	1	4	1	1	3	3	2	6	1	0	1	0	0	0
1000	1	Some college (no degree)	1	7	1	1	0	1	0	0	0	0	1	1	1	1	1	1	0	1	1	1	12	5	10	25	13.3333	5	6	3	1	3	1	3	6	1	1	1	3	6	1	3	6	1	1	0	1	0	0
354	2	Bachelor's degree	2	7	0	0	0	1	0	1	0	1	0	1	1	1	0	1	0	1	1	1	10	5	5	25	11.6667	2	5	4	5	5	1	3	6	5	3	6	5	6	3	4	3	0	0	1	1	0	0
903	1	Less than high school diploma	1	3	1	1	1	0	0	0	0	1	0	1	1	0	0	0	0	1	0	0	7	24	21	26	23.6667	2	3	2	3	2	5	2	3	4	2	3	4	2	3	4	2	0	1	0	0	0	0
555	2	Less than high school diploma	1	6	0	0	1	1	0	0	0	0	1	0	0	0	0	0	0	0	0	0	3	0	0	0	0	4	1	1	6	6	3.5	5	3.5	5	3.5	1	1	3.5	6	3	2	0	0	0	0	0	0
343	2	Less than high school diploma	1	4	0	0	0	0	0	0	0	0	0	1	0	0	0	0	1	0	0	0	2	50	5	7	20.6667	4	4	4	4	2	2	4	3	3	3	4	5	4	4	3	3	0	0	0	0	0	0
879	2	Less than high school diploma	1	1	1	0	0	1	0	0	0	1	1	0	0	1	0	1	0	1	1	0	8	0	0	10	3.33333	6	6	6	4	5	1	5	6	3	1	5	5	5	4	5	6	0	0	0	0	0	0
256	2	Less than high school diploma	1	4	1	0	1	1	0	0	0	1	0	1	0	1	0	0	0	0	0	0	6	0	0	0	0	5	5	1	1	1	1	3	1	1	2	2	5	5	1	4	1	1	0	1	0	0	0
565	1	Less than high school diploma	1	4	0	0	1	1	0	0	0	1	1	0	0	1	1	1	0	1	1	0	9	0	0	0	0	5	5	5	5	5	2	6	5	4	4	6	6	4	5	5	5	1	0	0	0	0	0
466	2	Less than high school diploma	1	6	1	0	0	1	0	0	0	1	0	0	0	0	0	0	0	0	0	0	3	45	50	20	38.3333	3	1	4	4	2	5	2	4	3	5	2	2	3	4	1	3	1	1	1	0	0	0
318	1	Less than high school diploma	1	4	1	1	0	0	0	0	0	1	0	0	0	1	0	0	0	1	1	1	7	2	1	5	2.66667	5	4	5	3	3	4	3	4	3	2	6	6	3	3	3	3	1	0	1	0	0	0
589	1	Less than high school diploma	1	4	0	0	0	1	0	0	0	0	0	1	0	1	1	0	0	1	0	0	5	0	0	0	0	5	5	5	5	5	2	5	5	4	4	5	5	4	5	5	5	0	0	0	0	0	0
395	1	Less than high school diploma	1	5	1	0	1	1	1	1	0	1	1	1	1	1	1	0	0	1	1	1	14	0	0	0	0	5	5	4	4	5	3	5	5	5	5	5	6	6	5	6	6	1	0	1	0	0	0
949	2	Less than high school diploma	1	1	1	1	1	0	0	0	0	1	0	0	1	0	0	1	0	1	0	1	8	60	75	65	66.6667	3	3	4	4	4	4	4	4	4	4	4	5	4	4	4	5	0	0	0	0	0	0
1004	1	Less than high school diploma	1	4	1	0	0	1	0	0	0	0	1	1	1	1	0	0	0	1	0	0	7	50	40	50	46.6667	6	6	3	4	2	1	3	6	4	1	1	6	6	3	6	1	0	0	0	0	0	0
509	1	Less than high school diploma	1	7	1	0	0	1	0	0	0	0	0	0	0	0	0	0	1	0	0	0	3	50	10	50	36.6667	3	3	3	3	3	3	3	3	3	3	3	3	3	3	3	3	0	0	0	0	0	0
898	2	High school diploma or GED	1	6	0	0	0	0	0	1	0	0	1	0	0	0	0	0	0	1	1	0	4	2	0	3	1.66667	5	4	4	5	5	1	5	5	4	2	4	6	5	5	6	3	1	0	0	0	0	0
507	1	Less than high school diploma	1	4	1	0	0	1	0	0	0	0	0	1	0	0	1	0	1	0	0	0	5	20	30	20	23.3333	4	4	4	4	4	4	3	3	3	3	4	4	3	4	4	4	0	0	0	0	0	0
739	1	Less than high school diploma	1	7	0	0	0	1	0	0	0	0	1	0	0	0	0	0	0	0	1	0	3	80	10	30	40	4	4	6	6	5	4	6	6	4	5	3	6	6	6	6	6	0	0	0	0	1	0
337	1	Less than high school diploma	1	5	0	0	0	1	0	0	0	0	0	1	0	0	0	1	0	1	0	1	5	45	25	25	31.6667	3	6	3	5	3	2	3	4	3	4	3	4	5	5	3	5	0	0	0	0	0	0
529	2	Less than high school diploma	1	6	0	1	0	1	0	0	0	0	0	1	0	1	0	0	0	1	0	1	6	25	25	65	38.3333	5	5	4	6	6	1	5	6	5	2	6	6	4	5	5	6	0	0	0	0	0	0
720	1	Less than high school diploma	1	4	0	0	1	1	0	0	1	1	1	1	0	0	0	0	0	1	1	1	9	1	1	1	1	2	4	4	5	4	1	6	6	6	2	2	6	6	3	4	2	1	0	1	0	0	0
806	1	Some college (no degree)	1	2	1	0	0	1	1	0	0	1	1	1	1	0	1	1	0	1	1	1	12	2	10	10	7.33333	2	3	2	4	4	1	2	4	3	3	3	3	4	3	3	1	1	1	1	1	0	0
149	1	Less than high school diploma	1	5	0	1	0	1	0	0	0	1	1	0	0	0	1	0	0	0	0	0	5	1	3	4	2.66667	3	3	3	3	3	3	3	3	3	3	3	3	3	3	3	3	0	0	0	0	0	0
520	2	Less than high school diploma	1	5	1	0	1	1	0	0	0	1	1	0	0	0	0	0	0	1	1	1	8	0	0	0	0	5	4	5	4	4	2	5	2	4	3	1	6	4	3	4	4	0	1	1	0	0	1
628	2	Bachelor's degree	2	7	1	0	1	0	0	0	0	1	1	0	0	1	1	1	0	1	0	0	8	0	0	10	3.33333	3	5	5	2	5	5	5	5	5	5	5	5	5	5	5	5	1	0	1	0	0	0
141	1	Less than high school diploma	1	3	1	0	0	1	0	0	0	0	0	0	0	0	1	0	0	0	0	0	3	0	0	0	0	6	6	6	6	6	1	4	6	6	4	5	6	6	6	6	4	0	0	0	0	0	0
812	1	Less than high school diploma	1	4	0	0	0	1	0	0	0	1	0	1	1	0	0	0	0	0	1	0	5	5	3	10	6	2	2	3	4	5	1	4	5	1	1	4	4	6	6	5	4	1	0	0	0	0	1
536	2	Some college (no degree)	1	6	0	0	1	1	0	0	0	1	1	1	1	0	0	1	0	1	1	0	9	20	5	5	10	5	5	2	1	5	1	2	5	5	4	1	6	6	2	6	5	1	0	0	0	0	0
755	2	Less than high school diploma	1	4	0	0	1	1	0	0	0	1	0	0	0	1	1	0	0	1	0	0	6	10	5	15	10	6	6	4	6	6	1	6	6	6	6	6	6	6	6	6	6	0	1	1	0	0	0
586	1	Less than high school diploma	1	4	1	0	1	1	0	0	0	1	1	0	1	1	0	0	0	0	1	1	9	0	0	0	0	5	5	3	5	3	2	5	4	4	1	3	5	6	5	5	6	0	0	1	0	0	0
113	2	Less than high school diploma	1	4	0	1	1	1	0	0	1	1	1	0	1	0	0	0	0	1	1	0	9	25	10	15	16.6667	5	6	6	6	6	1	5	5	4	5	6	6	6	5	5	4	0	0	0	0	0	1
329	2	Less than high school diploma	1	7	1	1	0	1	0	1	0	0	0	1	0	0	0	0	0	0	0	0	5	100	20	10	43.3333	3	4	2	4	2	4	3	3	4	3	5	4	5	4	3	3	0	0	0	0	0	0
481	2	Less than high school diploma	1	7	0	1	0	0	0	0	0	0	0	0	0	0	0	0	0	0	1	0	2	0	10	20	10	4	4	4	6	6	1	3	5	5	5	5	5	5	4	3	6	1	0	0	0	0	0
624	1	Less than high school diploma	1	6	0	0	1	1	0	0	1	1	0	0	0	1	0	0	1	0	0	0	6	0	0	0	0	6	6	5	6	6	1	6	6	5	5	6	6	6	5	6	6	1	0	1	0	0	0
59	2	Less than high school diploma	1	5	1	0	0	1	0	0	0	0	0	1	0	0	0	0	0	0	1	1	5	5	10	40	18.3333	4	5	5	5	5	2	3	4	4	4	5	5	4	4	5	5	0	0	0	0	0	0
860	1	Some college (no degree)	1	6	0	0	0	1	0	0	0	0	1	0	1	0	0	1	0	0	0	1	5	0	0	0	0	3	4	4	4	4	4	4	4	4	4	4	4	4	4	4	4	0	1	0	0	0	0
519	1	Less than high school diploma	1	2	1	0	0	1	0	0	0	1	1	1	1	1	0	0	0	1	1	1	10	0	0	1	0.333333	5	4	1	4	2	1	5	5	4	2	2	5	5	5	5	2	1	1	0	0	0	1
439	1	Bachelor's degree	2	2	1	0	1	1	0	0	0	1	1	0	1	1	0	1	0	1	1	0	10	0	10	10	6.66667	5	5	3	3	4	3	5	5	3	3	2	2	5	2	2	5	1	0	1	1	1	0
127	1	Less than high school diploma	1	4	1	0	0	1	0	1	0	1	0	0	0	0	0	0	0	0	0	0	4	50	0	0	16.6667	4	4	1	4	4	1	5	5	5	1	5	6	5	5	5	1	1	0	0	0	0	0
994	1	Graduate degree	2	4	0	0	1	1	0	0	0	1	1	0	0	1	1	1	0	1	0	0	8	5	20	50	25	5	4	3	5	4	2	4	5	4	4	3	5	5	3	4	3	1	1	1	1	1	1
44	2	Less than high school diploma	1	4	0	0	0	1	0	0	0	1	0	0	0	0	0	0	1	0	0	0	3	1	1	1	1	3	3	3	3	3	3	3	3	3	3	3	3	3	3	3	3	1	0	0	0	0	0
671	2	Less than high school diploma	1	4	0	0	0	1	0	1	0	0	1	1	1	1	0	0	0	0	1	0	7	10	10	11	10.3333	5	5	5	5	5	2	5	5	5	3	5	5	5	4	5	3	1	0	1	0	1	0
369	1	Less than high school diploma	1	4	0	0	0	1	0	0	1	1	0	1	0	0	0	0	0	0	1	0	5	65	75	30	56.6667	6	6	6	6	1	4	6	6	6	6	1	6	6	3	6	2	0	0	0	0	0	0
69	2	High school diploma or GED	1	4	0	1	0	1	0	1	0	1	0	0	1	0	1	1	0	1	1	1	10	25	50	6	27	1	1	6	6	6	1	1	6	6	3	3	6	1	4	6	2	1	1	1	0	1	1
316	2	Less than high school diploma	1	4	0	0	0	1	0	0	0	1	0	1	1	1	1	0	0	1	1	0	8	0	0	0	0	3	3	4	5	5	3	5	6	5	4	4	5	6	5	5	6	0	0	0	0	0	0
67	1	Less than high school diploma	1	5	0	0	1	1	0	0	0	0	1	1	1	1	1	0	0	1	1	0	9	0	10	0	3.33333	5	5	3	2	5	1	1	6	5	1	1	5	4	1	4	1	0	0	0	0	0	0
306	2	Less than high school diploma	1	4	1	0	0	1	0	0	0	0	0	1	0	0	0	0	0	1	0	0	4	10	10	50	23.3333	4	4	2	4	5	1	4	5	4	3	3	5	6	4	4	5	0	1	0	0	0	0
770	2	Less than high school diploma	1	7	0	0	1	1	0	0	0	0	0	0	0	0	0	0	1	0	0	1	4	80	49	50	59.6667	4	4	1	1	6	1	1	6	5	5	1	5	4	4	4	2	0	0	0	0	0	0
963	2	Less than high school diploma	1	7	1	0	0	1	0	0	1	1	0	1	1	1	0	0	0	1	0	0	8	25	25	50	33.3333	2	4	6	6	6	6	6	6	6	5	6	6	6	5	6	6	0	0	0	0	0	0
396	2	Less than high school diploma	1	4	0	0	0	0	0	0	0	0	0	0	0	0	0	1	1	1	1	0	4	80	75	80	78.3333	3	4	4	4	4	3	3	3	3	3	4	4	4	4	4	4	1	0	0	0	0	0
110	2	Some college (no degree)	1	6	1	0	0	0	0	1	0	1	0	0	0	1	0	0	0	0	1	0	5	16	12	20	16	2	3	3	3	3	3	3	3	2	4	4	4	4	4	4	4	0	0	0	0	0	0
610	1	Some college (no degree)	1	2	1	0	0	1	0	0	0	0	1	0	1	0	1	0	0	1	1	0	7	0	0	20	6.66667	5	6	5	5	5	1	4	5	3	2	3	3	5	2	4	6	0	0	1	0	0	0
479	2	Less than high school diploma	1	4	0	0	0	1	0	0	0	1	1	1	1	0	1	0	0	1	1	0	8	5	2	10	5.66667	4	3	2	2	4	1	4	4	2	2	4	5	5	3	5	3	0	0	0	0	0	0
926	1	Less than high school diploma	1	4	1	0	0	1	0	0	0	1	0	0	1	1	1	0	0	1	0	1	8	0	5	10	5	5	5	3	4	4	2	3	4	5	2	1	5	6	3	4	1	1	1	0	1	1	0
1044	2	Less than high school diploma	1	5	0	0	0	1	0	0	0	0	1	0	0	1	0	0	0	1	1	0	5	75	50	50	58.3333	4	4	6	5	3	5	5	5	3	3	4	5	6	5	4	6	0	0	0	0	0	0
107	1	Less than high school diploma	1	4	1	0	0	1	0	1	0	1	0	0	1	0	1	0	0	0	1	0	7	0	0	1	0.333333	3	3	5	4	1	1	3	5	3	1	1	6	5	3	5	1	0	0	0	0	0	0
593	1	High school diploma or GED	1	4	0	0	0	1	0	0	0	0	0	1	0	0	1	0	0	0	0	1	4	30	40	20	30	4	6	5	4	5	5	5	4	6	6	4	3	5	4	4	6	1	0	1	0	0	0
46	2	Less than high school diploma	1	7	0	0	1	1	0	0	0	0	0	0	0	0	0	0	0	0	1	1	4	100	100	50	83.3333	6	6	6	1	1	1	5	1	1	4	2	2	5	2	2	5	0	0	0	0	0	0
332	1	Less than high school diploma	1	4	0	0	1	1	0	1	0	0	1	0	1	0	0	0	0	1	1	0	7	0	0	0	0	5	5	5	1	1	1	5	1	1	1	1	1	1	1	1	6	0	0	0	0	0	0
927	1	Less than high school diploma	1	4	1	1	1	1	0	0	0	0	1	0	0	0	1	0	0	1	0	0	7	50	30	100	60	2	4	6	5	5	1	6	1	6	6	3	3	6	6	6	6	0	0	1	0	0	0
286	2	Less than high school diploma	1	6	1	0	1	1	0	0	0	1	0	0	0	0	0	0	0	1	1	1	7	40	40	40	40	4	4	5	5	5	2	5	5	5	4	4	5	5	4	4	5	0	1	0	0	0	0
681	2	Less than high school diploma	1	7	0	0	1	1	0	0	0	1	1	0	0	1	0	1	0	1	1	1	9	0	0	1	0.333333	3	3	5	4	5	1	6	4	5	5	5	6	4	5	6	4	0	0	0	0	1	0
80	1	Less than high school diploma	1	2	0	0	0	1	0	1	1	1	0	0	1	0	1	0	0	1	0	0	7	0	0	5	1.66667	5	6	6	6	2	1	6	6	4	2	1	6	6	3	6	3	0	0	1	0	0	0
171	2	Bachelor's degree	2	6	1	0	1	1	0	0	0	1	0	1	0	1	0	1	0	1	1	0	9	5	2	70	25.6667	4	3	5	5	5	1	4	3.5	5	4	6	6	4	4	5	5	1	1	1	1	1	0
539	1	Less than high school diploma	1	4	0	0	0	1	0	0	1	0	0	1	0	1	0	0	1	0	1	0	6	20	25	30	25	4	3	4	3	3	1	3	3	4	4	3	3	4	3	3	3	0	0	0	0	1	0
751	2	Less than high school diploma	1	4	1	0	0	1	0	0	0	1	1	1	1	0	0	0	0	1	0	1	8	0	0	0	0	6	6	6	6	6	2	6	6	6	1	6	6	6	4	6	4	1	0	0	0	0	0
616	1	Bachelor's degree	2	4	1	0	1	1	0	1	0	1	1	1	1	1	1	1	0	1	1	0	13	0	0	10	3.33333	2	4	4	4	4	1	3	3	2	2	3	5	5	4	4	5	1	0	1	0	0	0
287	2	Less than high school diploma	1	4	1	1	0	0	0	0	0	1	1	0	1	1	0	0	0	1	1	0	8	40	30	20	30	3	3	3	3	3	3	3	3	3	3	3	3	3	3	3	3	0	1	0	0	0	0
982	1	Bachelor's degree	2	5	1	1	0	1	0	1	0	1	1	1	1	1	0	1	0	1	1	0	12	1	1	10	4	3	4	2	3	2	1	3	4	3	2	4	5	5	3	5	4	1	1	1	0	1	0
723	1	Less than high school diploma	1	4	0	0	0	1	0	0	0	0	1	1	1	0	0	0	0	0	0	0	4	80	10	10	33.3333	4	4	5	5	5	3	4	4	4	4	5	6	5	5	6	6	0	0	1	0	0	0
82	2	Less than high school diploma	1	5	0	0	0	0	0	0	0	1	1	0	1	1	1	0	0	1	1	0	7	0	5	5	3.33333	3	4	5	5	5	2	4	4	4	4	3	4	5	5	6	6	0	0	1	0	0	0
769	1	Less than high school diploma	1	5	0	0	0	1	0	0	1	0	1	0	1	0	0	0	0	1	0	0	5	10	10	20	13.3333	5	5	5	4	4	2	5	3	4	4	3	4	5	5	4	5	0	1	0	0	0	0
313	2	Less than high school diploma	1	2	0	0	0	1	0	0	0	0	0	0	0	0	1	0	0	0	0	1	3	100	100	0	66.6667	6	6	6	5	6	1	6	5	1	3	4	5	2	5	3	2	1	0	0	0	0	0
612	2	Less than high school diploma	1	2	0	1	1	1	0	0	0	1	0	0	0	0	0	0	1	0	1	0	6	0	0	0	0	4	4	4	5	5	2	2	2	2	2	2	2	5	2	2	2	1	0	0	0	0	0
34	2	Graduate degree	2	2	0	0	1	1	0	0	0	0	1	0	1	1	1	0	0	1	1	0	8	0	0	10	3.33333	5	5	1	3	4	1	5	5	4	1	4	5	6	4	5	4	1	1	1	0	0	0
184	2	Less than high school diploma	1	3	0	0	0	1	0	0	0	1	1	1	1	1	1	0	0	1	0	0	8	2	1	50	17.6667	5	5	3	3	3	2	4	3	3	2	3	4	4	3	3	3	1	0	1	1	0	0
799	1	Less than high school diploma	1	4	1	0	0	0	0	0	0	1	0	0	1	0	0	1	0	1	1	0	6	100	5	20	41.6667	3	4	4	5	5	1	3	3	5	4	2	6	6	6	5	4	0	1	1	0	0	0
649	1	High school diploma or GED	1	4	1	0	1	1	0	0	0	0	1	0	1	0	0	1	0	0	0	0	6	100	100	100	100	1	6	6	1	6	6	1	1	1	6	6	6	6	6	6	1	1	0	1	0	1	1
742	1	Less than high school diploma	1	2	1	0	0	1	0	0	0	1	1	1	1	1	0	0	0	1	1	1	10	0	0	10	3.33333	5	5	5	5	5	5	5	5	5	5	5	5	6	6	6	1	1	0	0	0	0	0
966	1	Less than high school diploma	1	4	0	0	0	1	0	0	0	0	1	1	1	0	0	0	0	0	0	0	4	100	75	25	66.6667	5	5	5	5	5	1	5	5	4	4	5	5	5	4	5	5	0	0	0	0	0	1
819	1	Less than high school diploma	1	5	1	0	0	1	0	1	0	0	0	0	0	0	0	0	0	1	0	1	5	10	13	0	7.66667	1	3	4	2	2	4	4	2	1	3	2	1	2	1	1	6	1	0	0	0	0	0
77	1	Less than high school diploma	1	7	0	0	0	1	0	1	0	1	0	0	1	1	0	1	0	1	1	1	9	0	0	1	0.333333	5	5	4	5	5	1	4	5	6	1	1	3	6	3	5	6	1	0	0	0	0	0
65	1	Less than high school diploma	1	5	0	0	0	1	0	0	0	0	1	1	0	0	0	0	0	1	0	0	4	70	60	20	50	3	4	3	5	5	2	4	3	4	2	3	2	2	3	2	2	0	0	0	0	0	0
766	2	High school diploma or GED	1	7	0	0	0	1	0	0	1	1	1	0	1	1	1	0	0	0	0	1	8	50	40	25	38.3333	4	4	5	6	6	1	5	5	6	3	5	5	5	5	5	5	0	0	0	0	0	0
493	1	Less than high school diploma	1	4	0	0	0	1	0	0	0	0	0	0	0	0	0	0	0	1	0	0	2	50	70	30	50	4	6	5	5	5	6	5	5	6	5	6	4	6	5	5	4	0	0	1	0	0	0
654	1	Less than high school diploma	1	4	0	0	0	1	0	0	0	0	0	0	0	0	0	0	0	0	1	0	2	80	50	50	60	5	6	6	3	3	2	5	4	2	4	6	5	6	3	3	6	1	0	1	0	0	1
1042	2	Less than high school diploma	1	3	0	0	0	1	0	0	0	0	1	1	1	1	1	0	0	0	1	0	7	0	0	0	0	5	5	3	5	3	1	6	6	4	1	3	6	6	3	5	5	0	0	0	0	0	0
637	2	Less than high school diploma	1	2	0	1	0	0	0	0	0	0	0	0	0	0	0	0	0	0	1	1	3	50	30	30	36.6667	5	5	4	5	5	1	1	1	1	4	1	5	3	1	5	1	1	0	0	0	0	1
167	2	High school diploma or GED	1	2	1	0	0	1	0	0	0	0	1	0	1	0	1	1	0	1	0	0	7	2	5	2	3	4	5	5	5	5	1	6	5	3	2	5	6	6	2	5	3	1	0	0	0	0	0
605	1	Less than high school diploma	1	4	1	0	0	1	0	0	0	0	1	0	0	1	1	0	1	0	1	1	8	1	1	1	1	5	4	5	6	5	1	6	5	3	1	2	3	6	4	4	3	0	0	1	0	0	0
488	2	Less than high school diploma	1	7	0	0	1	0	0	1	0	0	0	1	1	0	0	0	0	0	1	1	6	19	13	14	15.3333	6	4	3	1	1	2	1	6	4	1	4	6	5	3	1	5	0	0	0	0	0	0
768	2	Less than high school diploma	1	4	0	0	0	0	0	0	0	0	0	0	0	1	1	0	0	1	1	0	4	10	10	10	10	4	5	4	5	5	1	5	5	5	2	6	6	5	4	5	4	0	0	1	0	0	0
392	2	Less than high school diploma	1	4	1	0	0	1	0	0	1	1	0	1	1	0	0	0	0	1	0	0	7	24	30	20	24.6667	3	6	6	6	5	2	4	3	5	4	5	6	6	6	5	6	1	0	0	0	0	0
548	2	Less than high school diploma	1	1	0	0	0	1	0	0	0	1	0	0	0	0	0	1	1	0	0	0	4	10	30	50	30	3	1	2	4	2	4	2	4	2	5	4	5	6	5	6	6	0	1	0	0	0	0
418	1	Some college (no degree)	1	4	0	0	0	0	0	1	0	0	0	0	1	1	0	0	0	1	1	0	5	0	0	0	0	3	1	6	5	5	1	5	5	6	5	5	5	5	6	5	6	1	0	1	0	0	0
342	1	High school diploma or GED	1	3	1	0	0	0	0	0	0	0	1	0	0	0	0	0	0	1	0	0	3	12	12	1	8.33333	5	4	4	6	4	5	4	3	4	4	5	5	5	6	6	4	0	0	0	0	0	0
333	2	Some college (no degree)	1	4	1	0	1	1	0	0	0	1	0	0	1	0	1	1	0	1	1	1	10	0	0	20	6.66667	4	4	5	3	5	2	3	2	6	3	6	6	6	6	6	6	1	0	1	0	0	0
37	1	Bachelor's degree	2	7	1	0	0	1	0	0	0	1	1	0	1	1	1	1	0	1	1	1	11	0	0	0	0	2	5	4	6	6	1	5	6	6	4	6	6	6	6	6	2	1	0	1	0	0	0
553	1	High school diploma or GED	1	1	1	0	0	0	0	0	1	0	0	0	1	0	0	1	0	0	0	1	5	60	60	80	66.6667	1	1	1	3	3	3	2	2	1	3	2	3	1	1	2	2	0	0	1	0	0	0
952	1	High school diploma or GED	1	4	0	0	0	1	0	0	0	0	0	0	0	0	0	0	0	0	0	0	1	70	50	75	65	1	1	3	3	2	4	4	3	4	2	4	4	4	4	4	4	1	0	0	0	0	0
796	1	Graduate degree	2	4	1	1	1	1	0	1	0	1	1	0	1	1	1	1	0	1	1	0	13	0	0	0	0	3	6	6	3	4	1	5	6	4	4	3	6	6	4	6	3	1	0	1	0	0	0
641	2	Some college (no degree)	1	7	1	0	0	1	0	1	0	1	0	0	1	1	0	1	0	1	1	0	9	10	20	80	36.6667	1	1	1	4	4	1	1	1	1	1	1	1	5	1	5	5	1	1	1	0	0	1
622	2	Bachelor's degree	2	5	0	1	1	1	0	0	0	1	1	0	0	1	0	0	0	1	1	0	8	0	0	0	0	5	5	4	5	6	1	4	6	4	4	5	6	6	5	6	4	0	1	0	0	0	0
840	1	High school diploma or GED	1	4	0	0	0	0	0	0	0	0	0	0	0	0	0	0	0	0	1	0	1	25	50	15	30	4	4	4	4	5	5	5	5	5	4	4	4	3	4	3	1	1	0	1	0	0	0
826	2	High school diploma or GED	1	4	0	0	0	1	0	0	0	1	1	0	1	0	0	0	0	0	0	0	4	45	52	25	40.6667	4	3	4	3	4	3	4	6	5	3	2	4	5	4	3	3	1	0	0	0	0	0
912	2	High school diploma or GED	1	4	1	1	0	0	0	0	0	0	0	0	0	0	0	1	0	0	0	0	3	20	10	0	10	1	1	3	2	4	3	5	5	2	1	5	4	3	2	4	4	0	0	1	0	0	0
665	1	Graduate degree	2	2	0	0	1	1	0	1	0	0	1	1	1	1	0	0	0	0	0	0	7	0	0	10	3.33333	4	5	2	1	2	1	2	3	2	2	2	4	5	2	2	3	0	0	1	0	0	0
381	1	Graduate degree	2	1	1	0	0	1	0	0	0	0	1	0	1	1	1	1	0	1	0	0	8	5	5	5	5	4	4	2	3	4	2	4	4	3	4	4	5	5	2	4	3	0	0	1	1	0	0
871	1	High school diploma or GED	1	1	0	0	1	1	0	0	0	1	0	0	1	1	0	0	0	1	1	0	7	0	0	0	0	6	6	6	6	6	6	6	6	6	6	6	6	6	6	6	6	0	0	0	0	0	0
792	1	High school diploma or GED	1	4	1	0	0	1	0	1	0	0	1	0	0	1	0	0	0	0	0	0	5	50	60	26	45.3333	3	3	3	4	3	3	3	2	3	2	3	3	2	3	2	2	0	0	0	0	0	0
793	2	High school diploma or GED	1	2	0	0	0	1	0	0	1	1	0	1	0	0	0	0	0	0	0	1	5	0	0	0	0	4	4	4	4	4	4	4	4	4	4	4	4	4	4	4	4	1	0	0	0	0	0
33	1	Some college (no degree)	1	4	1	0	0	1	0	0	0	1	0	1	1	1	1	1	0	1	0	0	9	5	5	20	10	2	4	3	4	4	1	2	3	2	3	2	2	5	3	4	1	0	1	1	0	0	1
491	2	High school diploma or GED	1	2	0	0	1	0	0	0	0	0	0	0	0	0	0	0	0	1	1	0	3	1	1	1	1	4	4	4	4	4	4	4	4	4	4	4	4	4	4	4	4	0	0	0	0	0	0
237	2	High school diploma or GED	1	4	0	0	1	0	0	0	1	0	1	1	0	0	0	0	0	0	0	0	4	10	1	14	8.33333	4	3	4	2	4	5	3	4	4	2	1	2	1	1	1	1	0	0	0	0	0	0
719	2	Graduate degree	2	5	1	0	0	0	0	1	0	1	1	0	0	1	0	0	0	0	1	0	6	20	20	20	20	2	2	3	5	5	1	1	5	4	3	5	5	6	3	5	4	1	0	0	0	0	0
140	1	High school diploma or GED	1	4	1	1	0	0	0	0	0	0	0	0	0	0	0	0	0	0	0	1	3	3	2	3	2.66667	3	2	3	4	5	3	3	4	4	4	4	4	4	4	3	3	0	0	0	0	0	0
465	1	High school diploma or GED	1	4	1	0	0	1	0	0	0	1	1	0	0	0	0	1	0	0	0	0	5	40	20	40	33.3333	4	3	4	4	5	4	3	4	5	5	4	4	5	5	4	4	0	0	0	0	0	0
852	2	High school diploma or GED	1	4	1	0	0	1	0	0	0	0	1	1	1	0	0	1	0	1	1	1	9	30	60	20	36.6667	1	4	4	4	4	3	4	4	4	3	2	3	4	3	4	3	1	1	0	0	0	0
689	1	Some college (no degree)	1	4	0	0	0	1	0	0	0	1	1	1	1	1	1	1	0	1	0	0	9	0	2	2	1.33333	5	6	5	5	2	2	4	6	6	1	5	6	6	3	6	6	0	0	0	0	0	0
905	2	High school diploma or GED	1	7	0	0	0	0	0	1	0	1	1	0	0	0	0	0	0	0	0	0	3	58	85	45	62.6667	3	5	3	5	6	5	5	6	6	5	4	3	3	3	3	5	0	0	0	0	1	0
710	2	Bachelor's degree	2	6	1	0	0	1	0	1	0	1	1	1	1	1	0	0	0	0	1	1	10	2	2	10	4.66667	4	4	4	4	4	4	4	4	4	4	4	4	4	4	4	4	1	0	1	0	0	0
564	2	Bachelor's degree	2	2	1	0	1	1	0	0	1	1	1	1	0	1	0	1	0	1	1	0	11	0	0	0	0	4	4	4	4	4	1	4	4	4	4	2	4	4	4	4	3	1	0	0	0	0	0
174	1	Graduate degree	2	7	0	0	1	1	0	0	0	1	1	0	1	1	0	0	0	1	0	0	7	5	33	66	34.6667	3	3	4	3	4	1	3	3	2	3	2	3	3	3	3	4	1	0	1	0	0	0
545	1	High school diploma or GED	1	4	0	1	0	0	0	0	0	0	0	0	1	0	0	0	1	1	0	1	5	10	15	10	11.6667	2	2	1	4	3	3	2	4	4	1	4	4	3	1	2	4	1	0	0	0	0	0
416	2	Some college (no degree)	1	4	0	1	1	1	0	0	0	1	1	0	0	0	0	0	0	0	0	0	5	40	0	0	13.3333	4	6	3	4	4	2	5	1	2	3	1	1	6	2	5	5	0	0	1	0	0	0
162	1	High school diploma or GED	1	4	0	0	0	1	0	0	0	0	0	0	0	0	0	0	0	0	0	1	2	50	20	30	33.3333	1	2	4	4	4	3	4	3	1	3	3	3	4	3	3	3	0	0	0	0	0	0
366	1	High school diploma or GED	1	4	0	1	0	1	0	1	0	0	0	0	0	0	0	0	0	1	0	1	5	100	100	100	100	4	4	4	4	4	4	4	4	4	4	4	4	4	4	4	4	0	0	0	0	0	0
996	2	Bachelor's degree	2	6	1	0	0	1	0	0	0	0	1	0	1	1	0	1	0	1	1	1	9	5	5	35	15	1	4	5	5	5	2	4	5	6	4	5	6	5	5	6	5	1	0	1	0	0	0
159	1	High school diploma or GED	1	7	1	0	0	1	0	0	0	1	1	1	0	0	0	1	0	1	0	0	7	0	0	0	0	6	5	5	5	6	2	6	6	5	5	6	6	6	5	5	6	1	0	1	0	1	0
281	2	High school diploma or GED	1	2	1	0	0	0	0	0	0	0	0	0	0	0	0	0	0	0	1	0	2	20	20	20	20	3	4	3	3	2	1	2	5	4	5	3	3	5	4	6	4	1	0	0	0	0	0
314	1	High school diploma or GED	1	1	0	0	0	0	0	0	0	0	0	0	1	1	1	0	1	0	0	0	4	80	90	70	80	5	5	5	5	5	5	5	5	5	5	5	5	5	5	5	5	0	0	1	0	0	0
725	1	High school diploma or GED	1	1	0	0	0	1	0	0	0	1	1	1	0	0	0	1	0	1	0	0	6	0	0	0	0	6	6	6	6	6	6	6	6	6	6	6	6	6	6	6	1	0	0	0	0	0	0
813	2	Graduate degree	2	4	1	1	1	1	0	0	0	1	1	1	0	0	0	0	0	1	1	0	9	20	10	10	13.3333	3	5	5	5	5	1	4	5	5	4	5	5	5	4	5	3	1	0	1	0	0	0
790	1	High school diploma or GED	1	2	0	0	0	0	0	0	0	0	1	0	0	0	0	1	1	0	0	0	3	70	40	20	43.3333	2	3	2	4	3	6	4	2	1	2	2	4	4	5	2	3	1	1	0	0	0	0
784	2	High school diploma or GED	1	3	1	1	0	1	1	0	0	0	1	0	0	0	0	0	0	1	0	0	6	65	10	0	25	4	5	6	4	4	3	3	4	5	3	4	5	3	5	4	3	0	0	1	0	0	0
11	2	High school diploma or GED	1	7	1	0	1	1	0	0	0	0	0	0	1	1	0	1	0	1	0	1	8	1	1	1	1	4	4	4	4	4	4	4	4	4	4	4	4	4	4	4	4	1	0	1	0	0	0
388	1	High school diploma or GED	1	1	0	1	0	1	0	0	0	0	1	1	0	0	0	0	0	1	0	1	6	5	0	100	35	3	4	4	4	5	5	5	5	5	5	3	6	6	6	5	5	1	1	1	0	0	0
957	1	Some college (no degree)	1	5	1	0	1	1	0	0	0	1	0	1	0	0	0	0	0	0	0	0	5	0	0	0	0	3	4	3	4	3	4	4	3	4	4	4	3	3	4	4	3	0	0	1	0	0	0
1022	1	High school diploma or GED	1	6	0	0	0	1	0	0	0	1	0	0	1	0	1	0	0	0	0	0	4	32	43	32	35.6667	4	5	6	6	6	6	6	6	6	6	6	6	6	6	6	6	1	0	0	0	0	0
919	1	Some college (no degree)	1	4	1	0	0	1	0	1	0	1	1	1	1	1	1	1	0	1	1	1	13	0	0	20	6.66667	4	3	4	3	3	1	4	5	4	3	3	4	3	3	5	1	1	1	1	1	1	1
743	1	Some college (no degree)	1	2	0	0	1	1	0	0	0	1	0	1	1	1	0	1	0	1	0	0	8	1	1	0	0.666667	4	4	5	2	4	2	3	3	3	4	4	5	4	4	3	3	1	0	1	0	0	0
228	1	High school diploma or GED	1	4	1	0	0	1	0	0	0	1	1	1	0	0	0	1	0	1	1	0	8	100	50	50	66.6667	3	3	3	3	3	3	3	3	3	3	3	3	3	3	3	3	0	0	1	0	0	0
166	2	Associate's degree	2	6	0	0	1	1	0	0	1	0	0	1	1	0	0	0	0	1	1	0	7	0	0	5	1.66667	3	4	1	4	5	1	2	5	5	5	3	5	2	2	4	1	1	0	0	0	1	0
135	1	High school diploma or GED	1	7	0	0	0	1	0	0	0	1	0	1	0	0	1	0	0	0	0	0	4	25	35	50	36.6667	6	5	4	6	5	6	6	6	5	6	6	4	5	5	6	6	0	0	0	0	0	0
838	1	Bachelor's degree	2	6	1	0	0	1	1	1	1	1	1	0	0	0	0	0	0	1	0	1	9	50	25	25	33.3333	1	4	1	2	2	1	2	5	5	5	5	5	3	2	5	3	1	0	1	0	0	0
721	2	Bachelor's degree	2	3	1	0	1	1	0	0	1	0	1	0	1	0	0	0	0	1	1	0	8	0	0	0	0	5	4	2	5	5	1	5	4	4	3	4	5	6	3	6	1	1	0	1	0	1	0
985	2	Bachelor's degree	2	4	1	1	1	1	0	0	0	1	1	0	1	1	1	1	0	1	1	0	12	0	0	10	3.33333	4	5	1	4	5	1	6	6	5	4	4	6	6	3	4	6	0	0	1	1	0	0
190	1	High school diploma or GED	1	1	0	0	0	0	0	0	0	0	1	0	0	0	1	0	0	0	0	0	2	30	28	60	39.3333	5	4	4	5	3	5	5	4	4	3	5	4	4	3	3	5	1	0	0	0	0	0
916	1	Graduate degree	2	6	1	0	1	1	0	0	0	1	0	1	1	1	0	1	0	1	1	1	11	20	20	20	20	2	3	3	3	4	2	2	4	3	2	2	5	4	2	3	2	1	1	1	1	1	1
188	1	Graduate degree	2	5	1	0	0	0	0	0	1	1	0	1	1	1	0	0	0	1	0	0	7	2	5	5	4	4	4	5	1	1	5	5	2	2	5	2	1	4	1	1	5	1	1	1	1	0	0
815	1	Graduate degree	2	3	1	0	0	1	0	0	0	1	1	1	1	1	0	0	0	1	0	0	8	5	10	5	6.66667	5	5	4	4	5	1	5	5	4	5	4	5	6	3	5	1	1	1	0	0	1	0
158	2	High school diploma or GED	1	4	1	0	0	1	0	0	0	0	0	0	1	0	0	0	0	0	0	0	3	1	0	0	0.333333	2	2	2	2	2	2	2	2	2	2	2	2	2	2	2	2	0	0	0	0	0	0
53	2	High school diploma or GED	1	2	0	1	0	1	0	0	0	1	0	0	0	0	0	0	0	0	0	0	3	50	50	80	60	5	5	5	5	5	5	5	5	5	5	5	5	5	5	5	5	1	0	0	0	0	0
591	2	High school diploma or GED	1	4	0	0	0	0	0	1	0	0	0	1	0	1	0	0	1	1	0	0	5	50	50	50	50	4	4	4	4	4	4	4	4	4	4	4	5	4	5	4	4	0	0	1	0	0	0
701	2	High school diploma or GED	1	3	0	0	1	1	0	0	0	0	0	0	1	1	0	0	0	1	1	0	6	0	10	10	6.66667	3	3	4	4	5	4	5	4	3	4	5	6	5	5	4	6	1	0	0	0	1	0
282	1	High school diploma or GED	1	6	0	0	0	1	0	0	0	0	0	0	0	0	0	0	0	1	1	1	4	10	10	10	10	4	4	3	5	5	1	1	3	3	3	3	6	3	3	3	6	1	0	0	0	0	0
889	2	High school diploma or GED	1	4	0	0	0	0	0	0	0	1	0	0	1	0	0	1	0	0	1	0	4	40	35	25	33.3333	5	4	5	4	5	5	4	4	3	4	5	4	4	5	4	3	0	0	0	0	0	0
464	2	High school diploma or GED	1	5	0	0	1	1	0	1	0	1	1	1	0	1	0	0	1	1	1	0	10	10	10	30	16.6667	3	2	3	6	5	1	3	4	4	2	5	5	4	3	5	4	1	0	1	0	0	0
810	2	Some college (no degree)	1	2	1	0	1	1	0	1	0	1	0	0	1	1	0	0	0	1	1	0	9	5	5	20	10	3	4	3	4	5	2	5	5	4	4	5	6	6	4	6	4	1	0	0	0	0	1
309	2	High school diploma or GED	1	5	1	0	0	0	0	0	1	0	0	0	1	0	0	0	0	0	0	1	4	50	50	50	50	5	6	5	6	6	6	6	6	6	6	5	6	6	6	6	6	1	0	1	0	0	0
703	2	Some college (no degree)	1	6	1	0	0	1	0	0	0	0	1	1	1	1	0	0	0	1	1	0	8	20	20	30	23.3333	2	2	2	5	5	2	5	3	4	4	5	4	3	3	5	4	0	0	0	0	0	0
599	1	Bachelor's degree	2	6	1	0	1	1	0	0	0	0	0	0	0	0	0	0	0	1	0	0	4	0	10	25	11.6667	4	4	5	5	5	1	2	4	3	5	5	6	4	5	5	1	0	1	1	0	0	0
899	2	High school diploma or GED	1	1	1	1	0	1	0	0	0	0	1	1	1	1	0	0	0	0	0	0	7	8	15	5	9.33333	6	6	4	5	6	1	6	6	5	4	5	5	4	6	6	3	1	1	1	0	0	0
367	2	High school diploma or GED	1	4	0	0	0	1	0	0	0	0	0	1	0	0	0	0	0	0	1	0	3	20	0	0	6.66667	6	6	6	6	6	6	6	6	6	6	6	6	6	6	6	6	0	0	1	0	0	0
1031	2	Bachelor's degree	2	4	1	0	0	1	0	1	1	1	1	1	0	1	0	0	0	0	0	0	8	0	0	0	0	2	2	3	3	4	3	4	3	4	3	5	4	3	5	4	3	1	0	0	0	0	0
14	2	High school diploma or GED	1	4	0	0	0	0	0	0	0	1	0	1	0	0	0	0	0	0	0	1	3	50	50	60	53.3333	3	3	3	3	3	4	4	4	4	4	4	4	2	3	4	3	0	0	0	0	0	0
422	2	High school diploma or GED	1	1	0	0	0	1	0	0	0	0	0	0	0	1	1	0	0	1	0	0	4	0	0	0	0	4	4	2	2	4	1	1	4	4	4	4	4	4	4	4	1	1	0	0	0	0	0
976	1	Graduate degree	2	3	0	0	1	1	0	0	0	1	1	0	1	1	0	0	0	1	0	0	7	5	5	5	5	5	5	5	5	4	1	5	5	2	3	4	5	5	4	6	4	1	1	1	1	0	1
375	1	High school diploma or GED	1	4	0	0	0	0	0	0	0	0	0	0	0	1	0	0	0	0	0	0	1	20	20	10	16.6667	4	4	4	4	4	4	4	4	4	3	2	4	4	4	4	3	1	0	0	0	1	0
383	2	High school diploma or GED	1	6	1	0	0	0	0	0	1	0	0	1	0	0	0	0	1	1	0	0	5	90	80	10	60	3	3	4	4	4	3	4	4	3	4	4	3	4	4	3	4	0	0	0	0	0	0
567	2	High school diploma or GED	1	4	0	0	0	1	0	0	0	0	1	1	0	1	0	0	0	0	1	0	5	10	20	10	13.3333	4	4	4	4	4	4	4	4	4	4	4	4	4	4	4	4	1	0	1	0	0	0
223	2	High school diploma or GED	1	4	0	0	0	1	0	0	0	0	0	0	0	0	0	0	0	0	0	0	1	5	5	5	5	1	1	1	1	1	1	1	1	1	1	1	1	1	1	1	1	0	0	0	0	0	0
738	1	Graduate degree	2	7	1	0	0	1	0	1	0	0	1	1	1	0	1	0	0	1	1	0	9	10	10	25	15	3	3	4	5	4	2	3	5	3	4	3	5	4	4	4	3	0	1	1	0	0	0
116	2	High school diploma or GED	1	4	1	0	0	1	0	1	0	0	1	1	0	1	1	1	0	1	1	0	10	5	0	50	18.3333	3	3	2	4	2	2	2	1	1	1	1	2	1	1	2	2	1	0	0	1	0	1
854	2	High school diploma or GED	1	7	0	1	1	1	0	0	0	1	0	0	1	0	1	0	0	0	0	0	6	0	0	0	0	6	6	6	6	6	1	6	6	6	1	3	6	6	4	4	6	1	0	1	0	0	0
955	1	High school diploma or GED	1	3	0	0	0	1	1	0	0	0	0	1	0	0	0	0	0	0	0	0	3	30	50	6	28.6667	1	3	4	6	6	1	6	6	2	3	2	3	5	5	4	3	1	0	1	0	0	0
98	1	High school diploma or GED	1	2	0	1	0	0	0	0	0	0	0	0	0	0	0	0	1	0	1	0	3	10	20	10	13.3333	4	5	6	6	5	1	6	4	6	2	6	6	6	6	6	6	0	0	1	0	0	0
732	2	Graduate degree	2	6	1	0	0	1	0	1	0	1	1	0	1	1	1	1	0	1	0	1	11	0	0	0	0	4	5	4	5	5	1	3	4	3	3	5	6	4	2	5	3	1	0	1	0	0	0
484	2	High school diploma or GED	1	5	0	0	0	0	0	0	1	0	0	0	0	0	0	0	0	0	0	1	2	0	0	1	0.333333	3	2	2	5	4	3	3	6	5	5	3	4	3	5	4	5	0	0	0	0	1	0
542	2	High school diploma or GED	1	4	1	1	1	1	0	0	0	0	1	1	0	0	0	0	0	1	0	0	7	1	1	2	1.33333	4	4	4	4	4	4	4	4	4	4	4	4	4	4	4	4	1	0	0	0	0	0
498	1	High school diploma or GED	1	4	1	0	0	1	0	0	1	0	0	0	0	0	0	1	0	0	1	0	5	10	10	90	36.6667	3	5	6	3	1	4	4	2	1	5	3	1	4	3	4	5	0	0	0	0	0	0
970	1	High school diploma or GED	1	3	1	0	0	1	0	0	0	1	1	0	0	1	0	0	0	0	1	0	6	5	10	50	21.6667	4	5	3	5	5	1	3	4	6	3	4	5	6	4	6	3	1	0	0	1	0	0
472	1	High school diploma or GED	1	7	0	0	0	0	1	0	1	0	0	0	0	0	0	0	0	0	0	1	3	70	70	100	80	6	5	6	5	6	5	6	5	6	5	6	5	6	5	6	5	0	0	0	0	0	0
211	2	High school diploma or GED	1	4	0	0	0	0	0	0	0	0	0	0	1	0	0	0	0	1	0	0	2	9	0	0	3	4	4	4	4	4	4	4	4	4	5	4	1	1	1	1	1	0	0	0	0	0	0
382	2	High school diploma or GED	1	4	0	0	1	1	0	0	0	0	0	0	0	1	1	0	0	0	0	0	4	0	0	0	0	1	1	1	1	1	1	1	2	4	4	2	4	4	4	1	4	1	0	0	0	0	0
218	2	High school diploma or GED	1	2	0	0	0	1	0	0	0	0	1	0	1	0	0	0	0	1	0	1	5	30	30	10	23.3333	4	4	4	4	4	4	4	4	4	4	4	4	4	4	4	4	1	0	0	0	0	0
811	2	Graduate degree	2	4	1	0	0	1	1	0	0	0	1	1	1	1	1	1	0	1	1	1	12	5	5	5	5	5	6	5	4	5	1	5	5	5	5	5	5	6	4	5	6	1	1	1	1	1	1
756	1	High school diploma or GED	1	2	1	0	0	1	1	0	0	1	1	1	1	0	0	0	0	1	1	1	10	0	0	0	0	4	4	5	5	4	4	5	3	3	4	4	4	5	4	4	3	1	1	1	0	0	0
932	2	Some college (no degree)	1	5	0	0	0	1	0	0	0	0	1	0	1	1	0	0	0	1	1	0	6	0	0	0	0	2	3	4	5	4	1	3	3	2	3	4	4	3	2	5	5	1	0	1	0	0	0
602	1	High school diploma or GED	1	4	0	0	0	1	0	1	0	0	0	1	0	0	0	0	0	0	1	0	4	0	0	0	0	4	4	4	4	5	2	5	5	5	5	5	5	5	5	5	5	0	0	0	0	0	0
866	1	High school diploma or GED	1	3	1	0	0	1	0	0	0	0	1	1	1	0	0	0	0	1	0	1	7	10	10	15	11.6667	4	4	3	3	4	3	5	5	3	3	5	5	5	5	3	2	1	1	1	1	0	0
451	2	Associate's degree	2	1	1	0	1	1	0	0	0	1	1	0	1	1	1	0	0	1	1	0	10	0	5	5	3.33333	5	5	3	3	3	2	4	4	4	3	3	5	5	3	5	2	1	1	1	0	1	0
632	1	High school diploma or GED	1	4	1	0	1	1	0	0	0	1	0	0	0	0	0	0	0	0	1	1	6	0	0	1	0.333333	4	4	4	3	4	4	4	4	4	4	4	3	4	4	4	4	1	0	0	0	0	0
139	1	High school diploma or GED	1	3	0	0	0	1	0	1	0	1	0	0	0	0	0	1	0	0	0	0	4	50	50	50	50	2	4	4	3	2	4	5	4	2	2	2	5	3.5	3.5	3.5	3.5	0	0	0	0	0	0
818	1	Associate's degree	2	1	1	0	1	1	0	0	0	1	1	1	1	1	0	1	0	1	1	1	12	0	0	25	8.33333	5	6	1	1	5	1	6	6	2	1	3	5	6	2	4	1	1	1	1	0	0	0
668	2	Bachelor's degree	2	4	1	0	1	1	1	0	0	1	1	1	1	1	0	1	0	1	1	0	12	5	5	10	6.66667	2	5	2	3	5	1	1	3	1	4	1	4	6	1	1	1	1	1	1	1	0	0
1020	1	High school diploma or GED	1	4	0	1	0	1	0	0	0	1	0	0	1	1	0	0	0	0	0	0	5	45	30	7	27.3333	3	2	4	5	5	4	5	4	5	5	4	5	4	5	5	4	0	0	0	0	0	0
981	2	Bachelor's degree	2	2	1	0	1	1	0	0	0	1	1	1	1	1	1	1	0	1	1	1	13	0	0	10	3.33333	4	4	3	4	3	3	4	4	3	3	3	4	5	3	5	2	1	0	0	0	1	0
232	1	High school diploma or GED	1	4	0	1	0	1	0	0	0	0	1	0	0	0	0	0	0	0	1	0	4	50	50	50	50	3	4	4	4	4	4	4	4	4	4	4	4	4	4	4	4	1	0	0	0	0	0
1033	2	Graduate degree	2	2	0	0	1	1	0	0	1	1	0	1	1	0	0	0	0	1	1	0	8	0	0	0	0	5	5	2	5	2	2	5	2	2	2	2	5	5	2	5	2	1	1	1	0	0	0
924	1	Graduate degree	2	7	1	0	0	1	0	0	0	0	0	0	1	1	0	1	0	1	1	1	8	0	20	25	15	2	4	5	5	5	1	5	5	2	2	5	5	5	2	5	6	1	1	1	1	1	0
412	2	High school diploma or GED	1	4	1	0	0	1	0	0	0	0	0	0	0	0	0	0	0	1	1	1	5	10	10	15	11.6667	4	6	2	4	5	1	5	6	2	3	6	6	6	1	6	6	0	0	0	0	0	0
892	2	High school diploma or GED	1	5	0	0	0	1	0	0	0	1	0	1	0	1	0	0	0	1	1	1	7	15	5	50	23.3333	4	5	5	3	5	3	6	5	4	4	4	5	4	4	4	4	1	0	0	0	0	0
1001	1	Graduate degree	2	4	1	0	1	0	0	0	0	0	1	1	1	0	0	0	0	1	1	0	7	40	20	30	30	5	5	6	6	6	2	5	6	5	4	5	6	6	4	6	4	0	0	0	0	0	0
506	1	High school diploma or GED	1	4	0	1	0	0	0	0	0	0	0	1	0	0	0	0	0	0	0	1	3	0	5	10	5	6	6	5	5	6	3	4	4	2	4	3	1	3	4	4	4	0	0	1	0	0	0
206	2	High school diploma or GED	1	5	1	0	0	1	0	1	0	1	1	0	1	1	0	1	0	1	1	1	11	25	25	25	25	3	3	3	1	3	1	1	1	1	3	1	1	1	1	1	3	1	0	0	0	0	0
749	2	High school diploma or GED	1	3	0	0	1	0	0	0	0	0	0	0	1	0	0	0	0	0	1	0	3	10	10	5	8.33333	3	5	5	5	5	2	4	5	5	4	5	5	5	5	4	3	1	1	0	0	0	0
45	1	High school diploma or GED	1	5	1	1	0	0	0	1	1	0	0	1	1	0	0	0	0	0	0	0	6	50	10	10	23.3333	5	5	4	3	2	2	5	3	3	2	3	3	6	4	3	3	1	0	0	0	0	0
12	2	High school diploma or GED	1	4	1	0	0	1	0	0	0	0	1	0	1	1	1	1	0	1	1	1	10	0	0	10	3.33333	2	2	2	2	2	2	2	2	2	2	2	2	2	2	2	2	1	0	1	0	0	0
490	2	High school diploma or GED	1	1	1	0	0	1	0	0	0	0	0	0	1	0	0	0	0	0	0	0	3	40	50	100	63.3333	6	6	6	6	6	6	6	6	6	6	6	6	6	6	6	6	0	0	0	0	0	0
729	1	High school diploma or GED	1	4	0	0	0	1	0	1	0	0	0	1	0	0	0	0	0	1	0	0	4	10	0	1	3.66667	4	5	4	2	4	2	3	6	5	4	4	5	6	4	4	1	0	0	1	0	0	0
845	1	High school diploma or GED	1	4	1	0	1	1	0	0	0	1	1	1	1	1	0	1	0	1	1	1	12	0	0	0	0	6	6	2	3	6	1	3	5	2	2	5	5	6	3	3	6	1	0	1	0	0	0
96	2	Some college (no degree)	1	5	0	0	0	1	0	0	0	0	1	0	1	1	0	0	0	1	1	0	6	5	10	5	6.66667	5	4	4	3	4	1	5	4	3	4	4	6	5	4	5	5	1	0	1	0	1	0
248	1	High school diploma or GED	1	6	1	0	0	1	0	0	0	1	1	1	0	1	0	0	0	1	0	0	7	15	40	20	25	5	5	3	4	5	4	3	4	4	3	3	4	5	3	3	2	1	0	1	0	0	0
834	1	Some college (no degree)	1	2	0	0	0	0	0	0	0	1	1	0	1	0	0	0	0	1	1	0	5	10	10	25	15	4	4	5	1	2	3	4	1	1	2	2	1	3	4	3	1	0	0	1	0	0	0
284	1	High school diploma or GED	1	4	1	0	1	1	0	0	0	1	0	0	0	0	0	1	0	0	0	1	6	0	0	0	0	4	4	4	4	4	4	4	4	4	4	4	4	4	4	4	4	1	0	0	0	0	0
715	2	High school diploma or GED	1	4	0	1	1	1	0	1	0	1	0	0	0	0	0	0	0	0	1	0	6	75	50	5	43.3333	5	5	5	4	6	3	5	6	5	5	5	5	5	5	5	5	0	0	1	0	0	0
746	1	Some college (no degree)	1	4	1	0	0	0	0	1	0	1	1	0	1	1	0	0	0	0	1	0	7	2	2	2	2	5	5	5	5	5	2	4	5	4	5	5	5	5	5	5	1	1	0	1	1	0	0
518	1	High school diploma or GED	1	3	0	0	0	1	0	1	0	0	0	1	0	1	0	1	0	0	0	0	5	0	0	60	20	4	6	5	3	4	1	5	3	2	1	3	5	6	2	4	1	1	1	1	0	0	1
427	2	High school diploma or GED	1	5	0	0	0	1	0	0	0	0	1	0	0	1	0	0	1	1	0	0	5	20	10	15	15	1	4	4	3	3	1	1	1	2	3	3	1	1	1	1	4	0	0	0	0	0	0
791	1	High school diploma or GED	1	5	0	0	0	1	0	0	0	0	1	0	1	1	1	0	0	1	0	0	6	5	5	20	10	4	6	3	4	6	1	3	1	2	1	1	6	6	4	5	6	0	0	1	0	0	0
636	1	Some college (no degree)	1	4	1	0	0	1	0	0	0	0	1	0	1	0	0	0	0	1	1	0	6	0	0	10	3.33333	5	4	5	5	5	3	4	5	4	5	5	5	5	3	4	5	1	0	1	0	0	1
244	1	High school diploma or GED	1	4	1	0	0	1	0	0	0	1	1	0	0	0	0	0	1	1	1	0	7	0	0	0	0	3	2	4	4	3	1	3	3	2	2	2	5	2	2	3	3	1	0	1	0	0	0
613	2	Some college (no degree)	1	3	1	0	0	1	0	1	0	1	1	1	1	1	1	1	0	1	1	1	13	0	10	0	3.33333	3	5	1	3	5	1	3	5	5	4	2	5	5	2	2	1	1	1	1	0	0	0
922	2	Some college (no degree)	1	4	1	0	1	1	0	1	0	1	0	0	1	1	0	1	1	1	0	1	11	10	100	100	70	2	4	5	6	5	1	5	6	4	5	6	6	5	4	6	6	0	1	1	1	1	1
297	2	Bachelor's degree	2	3	1	0	1	0	0	0	0	1	1	0	1	0	0	1	0	1	1	0	8	0	0	25	8.33333	4	4	2	2	3	1	4	3	2	3	1	1	4	2	3	4	1	0	0	0	0	0
13	1	High school diploma or GED	1	4	1	0	0	0	0	0	0	1	1	0	0	0	0	0	0	1	0	1	5	0	0	0	0	3	3	3	3	3	3	3	3	3	3	3	3	3	3	3	3	1	0	0	0	0	0
847	1	High school diploma or GED	1	4	0	0	0	1	0	0	0	1	1	0	0	0	0	0	0	0	0	0	3	45	60	25	43.3333	3	4	4	5	5	1	5	4	4	2	1	6	2	4	5	1	1	0	0	0	1	1
760	1	Bachelor's degree	2	3	1	0	0	1	0	0	0	1	1	1	1	1	1	1	0	1	1	1	12	0	0	0	0	4	4	4	4	3	3	4	4	4	3	4	4	4	3	4	3	1	1	0	1	0	0
358	1	Bachelor's degree	2	6	0	1	0	1	0	1	0	0	1	1	1	1	0	0	0	1	1	0	9	0	0	0	0	3	3	4	4	4	1	4	2	3	2	2	3	2	2	2	2	1	0	1	0	0	0
440	1	Bachelor's degree	2	4	0	0	0	1	0	0	1	1	1	0	1	1	0	0	0	1	1	0	8	5	1	5	3.66667	4	3	3	5	3	1	2	2	2	2	1	1	2	1	3	3	0	0	1	0	0	0
623	2	Graduate degree	2	4	1	0	0	1	0	0	0	1	1	0	1	1	1	1	0	1	1	0	10	0	0	10	3.33333	2	4	5	5	5	2	5	3	4	5	5	5	4	3	5	1	0	0	0	0	0	0
944	2	High school diploma or GED	1	4	1	0	0	1	0	0	0	0	0	1	0	0	0	1	0	0	0	0	4	10	50	10	23.3333	4	6	2	4	2	1	5	5	3	2	4	5	6	5	3	4	0	0	0	0	0	0
557	2	Less than high school diploma	1	4	1	0	0	0	1	0	1	1	0	1	0	0	0	0	0	0	0	0	5	20	30	10	20	3	4	4	2	3	5	4	4	2	3	4	4	5	3	4	5	0	0	1	0	0	0
794	2	High school diploma or GED	1	4	0	0	0	0	0	0	0	0	0	0	1	0	0	0	0	0	0	1	2	0	5	0	1.66667	5	5	2	4	5	3	3	4	5	4	5	5	5	5	5	5	1	0	0	0	0	0
686	2	High school diploma or GED	1	5	0	1	0	1	0	0	1	0	0	1	0	0	0	0	1	0	0	0	5	0	0	25	8.33333	4	5	4	5	4	5	4	5	3	1	4	3	5	4	3	3	1	0	1	0	0	0
894	1	High school diploma or GED	1	1	0	0	1	0	0	0	0	0	1	0	0	1	0	1	0	1	1	0	6	5	5	5	5	5	4	5	4	4	2	6	3	5	3	4	4	5	3	5	5	0	0	1	0	0	0
425	1	High school diploma or GED	1	4	0	0	1	1	0	0	0	1	1	1	0	1	0	0	0	1	0	1	8	10	10	5	8.33333	6	5	6	6	6	1	3	3	3	6	6	1	6	6	2	6	0	0	0	0	1	0
150	1	High school diploma or GED	1	4	0	0	1	1	1	0	0	0	1	0	0	0	0	0	0	1	0	1	6	10	15	25	16.6667	4	4	4	5	5	4	4	3	4	5	5	5	5	4	4	3	0	0	1	0	0	0
27	2	High school diploma or GED	1	7	1	0	0	0	0	0	1	1	1	1	1	1	0	1	0	1	0	0	9	5	5	15	8.33333	2	2	2	5	4	1	2	4	5	5	5	5	5	5	5	1	1	0	1	0	0	1
527	1	High school diploma or GED	1	4	0	0	0	0	0	0	0	0	0	1	0	0	0	0	0	0	0	0	1	100	20	20	46.6667	2	4	3	4	3	4	3	2	2	2	3	2	2	2	2	4	0	0	0	0	0	0
842	1	Some college (no degree)	1	2	0	0	1	1	0	0	0	0	1	0	0	0	1	0	0	1	0	0	5	50	20	30	33.3333	6	5	6	5	6	5	6	5	6	5	2	4	6	3	4	5	1	0	1	0	0	0
795	2	High school diploma or GED	1	4	0	0	1	1	0	0	0	0	0	1	0	0	0	0	0	0	1	0	4	10	10	10	10	5	5	4	3	2	1	3	2	1	2	1	3	1	1	1	1	1	0	0	0	0	0
230	2	High school diploma or GED	1	2	1	0	0	1	0	0	0	1	1	1	1	0	0	0	0	1	0	0	7	0	0	0	0	2	4	1	5	4	1	2	4	1	2	1	3	2	2	4	1	1	0	0	0	0	0
386	1	Some college (no degree)	1	4	1	0	0	1	0	0	0	1	0	1	1	1	0	1	0	1	0	0	8	10	10	25	15	4	3	5	5	5	2	3	3	5	5	4	5	5	2	4	5	1	0	0	0	0	0
705	1	Some college (no degree)	1	2	0	1	0	1	0	0	0	1	1	1	1	1	0	0	0	0	0	1	8	1	1	10	4	4	4	5	5	4	3	3	4	3	3	3	3	3	4	5	5	0	0	0	0	0	0
48	1	Associate's degree	2	4	0	0	1	1	0	0	0	1	1	0	0	0	0	0	0	0	0	0	4	66	45	56	55.6667	3	4	3	4	4	4	4	4	4	3	2	2	5	5	5	5	0	0	0	0	0	0
20	2	Associate's degree	2	1	0	0	0	0	0	0	0	0	1	1	0	0	0	0	0	0	0	0	2	25	25	25	25	5	6	6	6	5	1	4	4	2	5	2	5	6	2	5	5	0	1	1	1	0	0
639	1	High school diploma or GED	1	4	0	1	1	1	0	0	0	1	1	1	1	1	1	0	0	0	1	0	10	0	0	10	3.33333	5	4	3	3	3	2	3	4	4	3	3	4	5	3	4	2	1	1	1	0	0	1
745	2	Associate's degree	2	4	1	0	1	0	0	0	0	0	0	1	1	1	1	1	0	1	1	0	9	10	40	50	33.3333	3	3	2	4	2	1	2	2	2	1	2	3	4	1	4	1	1	1	0	0	0	0
700	1	High school diploma or GED	1	4	0	0	1	0	0	0	0	0	1	1	1	1	0	1	0	1	0	0	7	0	0	0	0	6	6	6	6	6	1	1	1	1	1	1	1	6	1	1	1	0	0	0	0	1	0
975	2	Bachelor's degree	2	2	1	0	0	1	0	1	0	0	1	1	1	1	0	1	0	1	1	1	11	0	0	1	0.333333	5	5	3	2	2	1	4	5	3	3	2	5	5	3	4	2	1	1	1	0	0	1
904	1	Bachelor's degree	2	4	1	0	0	1	0	0	0	0	1	0	1	0	0	0	0	0	0	0	4	0	0	0	0	3	3	4	3	4	4	4	4	4	4	4	3	4	3	3	4	0	1	1	0	0	0
93	2	Bachelor's degree	2	4	1	0	0	1	1	0	1	1	1	1	1	0	0	0	0	0	0	0	8	0	5	10	5	5	5	6	5	5	5	5	5	5	5	5	5	6	2	4	5	0	0	0	0	0	0
888	2	High school diploma or GED	1	3	0	0	0	1	0	0	0	1	1	0	1	1	0	0	0	0	1	0	6	7	9	25	13.6667	5	5	4	4	5	3	3	3	3	2	2	4	6	2	6	5	1	0	0	0	0	0
644	2	High school diploma or GED	1	4	1	0	0	1	0	0	1	1	1	1	0	1	0	0	0	1	1	1	10	0	0	40	13.3333	3	3	2	4	4	3	4	4	4	2	4	4	6	5	5	1	1	1	1	0	0	1
317	2	High school diploma or GED	1	6	1	0	0	0	0	0	0	0	1	1	0	0	1	1	0	0	0	0	5	1	1	5	2.33333	4	4	4	4	5	1	4	6	4	2	6	6	6	2	5	2	0	0	1	0	0	0
74	1	Bachelor's degree	2	4	1	0	1	1	1	1	1	1	0	1	0	1	1	1	0	1	1	0	13	5	5	5	5	5	2	2	2	2	2	2	2	2	2	2	2	2	2	2	2	1	1	1	0	0	0
169	1	Graduate degree	2	6	1	0	1	1	0	0	1	0	1	1	1	1	0	1	0	1	0	0	10	20	5	5	10	3	4	2	5	6	1	5	5	6	3	6	6	4	4	6	6	1	0	1	0	0	0
884	2	High school diploma or GED	1	4	0	1	0	1	0	0	1	0	1	0	1	1	1	0	0	0	0	0	7	30	0	0	10	6	5	3	6	4	2	3	4	4	2	2	5	5	5	5	2	0	0	1	0	0	0
983	2	Graduate degree	2	1	0	0	1	1	0	0	0	1	1	1	1	1	1	0	0	1	1	0	10	0	0	5	1.66667	5	5	4	2	2	1	2	2	2	2	2	4	5	2	2	2	1	0	1	1	0	0
1008	1	High school diploma or GED	1	5	1	0	0	1	0	0	0	0	0	1	1	1	1	0	0	1	0	0	7	20	0	10	10	4	4	5	5	5	3	4	5	5	4	6	6	5	6	6	5	1	0	0	0	0	0
550	1	High school diploma or GED	1	5	0	0	0	1	0	0	0	1	0	1	0	1	0	0	0	1	0	0	5	75	80	20	58.3333	5	5	4	5	5	1	5	5	4	4	2	5	6	4	5	5	1	0	1	0	0	0
758	2	High school diploma or GED	1	5	1	0	0	1	0	0	0	1	1	0	1	1	1	1	0	1	1	1	11	0	5	10	5	5	3	1	6	4	1	5	6	6	1	5	6	5	2	6	2	0	0	1	0	0	0
773	2	High school diploma or GED	1	4	0	0	0	1	0	0	0	1	1	0	1	1	1	0	0	1	1	0	8	2	0	0	0.666667	3	3	2	3	2	2	3	3	3	2	2	2	3	3	2	2	1	1	1	0	0	0
177	2	High school diploma or GED	1	2	0	0	1	1	0	1	0	0	1	1	1	1	1	1	0	1	1	0	11	0	0	20	6.66667	5	6	4	5	5	1	4	5	5	4	3	4	6	5	5	4	1	1	1	1	0	1
176	2	Some college (no degree)	1	5	1	0	0	1	0	0	0	1	0	1	1	0	1	1	0	0	1	1	9	5	6	50	20.3333	2	2	2	2	2	2	2	2	2	2	1	3	4	2	4	2	1	1	1	0	0	1
706	1	High school diploma or GED	1	5	0	0	0	0	0	0	0	0	0	0	0	0	0	0	0	0	0	0	0	5	5	10	6.66667	5	4	3	3	3	1	4	4	4	2	5	6	5	3	4	2	1	0	1	0	0	0
832	1	Some college (no degree)	1	7	1	0	0	1	0	0	0	1	0	0	1	1	0	1	0	1	0	1	8	20	20	20	20	2	4	4	1	1	1	4	1	2	3	4	5	5	1	5	5	1	1	1	0	0	0
974	2	Some college (no degree)	1	6	1	0	0	1	0	1	0	1	1	1	1	1	1	1	0	1	1	1	13	0	10	10	6.66667	4	6	3	5	6	1	3	5	6	3	5	6	5	4	5	4	1	1	1	1	1	0
296	1	Some college (no degree)	1	6	1	0	1	1	0	0	0	1	1	0	0	1	0	0	0	0	0	0	6	10	15	20	15	2	3	5	3	3	3	2	4	4	3	5	5	5	2	4	2	0	0	0	0	0	0
578	1	Some college (no degree)	1	6	0	0	1	1	0	0	0	0	0	0	1	0	0	1	0	0	0	0	4	0	0	5	1.66667	5	6	2	6	6	1	1	5	4	1	1	1	5	2	5	6	1	0	1	0	0	0
1043	2	Associate's degree	2	4	0	0	0	0	0	0	0	1	0	0	0	0	0	0	0	0	0	0	1	0	0	0	0	4	3	3	3	3	4	3	3	3	1	4	5	3	3	3	4	0	0	0	0	0	0
204	2	Bachelor's degree	2	4	1	0	0	1	0	0	0	1	1	1	0	1	1	1	0	1	1	1	11	0	0	1	0.333333	1	1	1	1	1	1	1	1	1	1	1	1	1	1	1	1	1	1	1	1	0	0
196	2	Bachelor's degree	2	6	0	0	1	1	0	0	0	1	0	0	0	0	0	0	0	1	1	1	6	0	20	70	30	2	3	5	4	5	1	1	1	3	2	5	3	5	2	5	6	1	1	0	0	0	0
503	1	High school diploma or GED	1	3	0	0	0	1	0	0	0	0	0	1	1	0	0	0	0	0	0	0	3	45	10	5	20	6	5	2	2	2	2	5	4	4	2	3	4	3	3	5	1	0	0	1	0	0	0
181	1	Graduate degree	2	1	1	0	1	1	0	0	1	0	1	1	1	1	1	0	0	1	1	1	12	1	0	2	1	2	3	4	3	3	1	4	4	3	4	3	4	4	3	4	4	0	0	1	1	0	1
164	1	High school diploma or GED	1	4	0	0	1	1	0	0	0	1	1	0	0	1	0	1	0	1	0	0	7	10	5	6	7	2	4	3	4	3	2	4	5	5	4	2	4	3	2	5	3	0	0	0	0	0	0
448	1	Graduate degree	2	1	1	0	0	1	0	1	0	1	1	1	1	1	1	1	0	1	1	1	13	0	10	10	6.66667	5	5	2	2	3	1	3	1	3	3	3	3	5	3	3	1	0	1	1	0	0	0
674	2	High school diploma or GED	1	6	1	0	0	0	0	0	0	0	0	0	0	0	0	0	0	1	0	0	2	40	20	30	30	3	3	2	3	2	1	2	2	2	2	1	3	2	2	2	1	0	0	0	0	0	0
765	1	High school diploma or GED	1	7	0	0	1	1	0	0	0	1	1	1	1	0	0	0	0	1	1	0	8	1	1	0	0.666667	4	3	6	5	3	2	5	4	3	3	2	3	5	2	3	4	1	0	0	0	0	0
452	2	High school diploma or GED	1	5	0	0	0	1	1	0	0	0	0	1	0	1	0	0	1	1	1	0	7	50	20	10	26.6667	5	2	3	5	4	1	5	3	2	2	4	5	5	2	5	2	1	1	0	0	0	0
980	1	High school diploma or GED	1	2	1	1	1	1	0	0	0	1	0	0	0	0	0	0	0	0	0	0	5	30	60	80	56.6667	4	3	4	4	4	4	3	3	3	4	4	4	4	4	4	4	1	0	1	0	0	1
682	2	High school diploma or GED	1	5	1	0	0	1	1	0	1	0	1	1	1	0	0	0	0	1	0	1	9	0	0	0	0	6	6	6	6	6	6	6	4	5	1	4	4	3	3	3	3	1	0	1	0	0	0
965	1	High school diploma or GED	1	4	0	0	0	1	0	0	0	1	1	0	1	0	0	0	0	1	1	1	7	30	25	15	23.3333	5	5	4	4	4	4	4	4	4	4	5	4	4	4	4	4	0	0	1	0	0	0
288	2	High school diploma or GED	1	6	1	1	1	0	0	0	0	1	0	0	0	0	0	0	0	0	0	0	4	100	100	100	100	5	5	4	4	5	2	4	4	3	4	5	5	4	3	5	5	1	0	1	0	0	0
638	1	High school diploma or GED	1	3	1	1	1	1	0	0	0	1	0	0	0	0	1	0	0	1	1	0	8	10	10	20	13.3333	5	5	5	5	6	4	5	5	5	5	6	6	6	5	6	6	1	0	1	0	0	1
377	1	Some college (no degree)	1	7	1	1	1	1	0	0	1	0	0	0	0	1	0	0	0	1	0	0	7	2	5	5	4	4	5	5	4	4	5	4	5	5	4	5	5	5	3	4	6	1	0	0	0	0	0
424	1	High school diploma or GED	1	5	0	0	0	1	0	0	1	0	0	1	1	1	0	0	0	1	1	0	7	20	20	20	20	3	3	3	3	3	3	3	3	3	3	3	3	3	3	3	3	0	0	1	0	0	0
496	1	Some college (no degree)	1	7	0	0	0	1	0	1	0	0	0	0	1	0	0	0	0	0	1	0	4	1	4	20	8.33333	6	5	6	5	6	5	6	5	4	4	5	6	5	5	4	5	1	0	0	0	0	0
295	1	Associate's degree	2	2	0	0	0	1	0	0	0	1	1	1	1	1	0	0	0	1	0	0	7	30	40	70	46.6667	1	1	1	1	1	1	1	1	1	1	1	1	1	1	1	1	1	0	1	0	1	0
108	2	High school diploma or GED	1	3	0	0	1	1	0	0	0	0	0	0	0	1	0	0	0	0	0	0	3	10	5	3	6	5	6	6	6	6	1	1	6	6	5	1	1	6	6	6	6	0	0	0	0	0	0
664	2	Associate's degree	2	3	1	0	0	1	0	0	0	0	1	1	1	1	0	1	0	1	1	1	10	1	1	10	4	5	5	5	5	6	2	5	6	6	4	6	6	5	5	6	1	1	0	1	0	0	0
125	1	Bachelor's degree	2	1	1	0	1	1	0	0	0	0	1	0	1	1	1	0	0	1	1	1	10	0	0	50	16.6667	5	5	3	3	2	1	5	5	4	1	1	6	5	4	4	1	1	0	1	0	0	0
754	2	High school diploma or GED	1	4	0	0	1	1	0	0	0	0	0	1	0	1	0	0	0	0	0	0	4	15	10	50	25	2	4	4	4	4	2	2	3	2	2	2	3	4	2	4	2	1	1	1	0	0	0
809	1	High school diploma or GED	1	5	0	0	0	1	0	0	0	1	0	1	1	0	1	0	0	0	1	0	6	2	1	75	26	3	5	4	5	4	4	5	5	5	4	3	6	6	5	6	5	1	0	0	0	0	1
97	1	High school diploma or GED	1	7	0	0	0	1	0	0	0	0	0	0	0	1	0	0	1	0	0	1	4	40	30	5	25	3	4	5	4	4	1	4	4	4	4	2	3	5	4	4	5	0	0	0	0	0	0
477	2	Less than high school diploma	1	5	0	0	0	1	0	0	0	0	0	0	0	0	1	0	0	1	1	1	5	25	10	5	13.3333	3	4	3	3	4	3	3	4	4	4	3	3	3	4	4	5	0	0	0	0	0	0
676	2	High school diploma or GED	1	6	1	0	0	0	0	0	0	0	0	0	0	0	0	0	0	1	1	0	3	50	20	25	31.6667	2	2	2	2	2	2	2	2	2	2	2	2	2	2	2	2	1	0	0	0	0	0
891	2	High school diploma or GED	1	3	0	0	0	1	0	1	0	0	1	1	1	1	0	0	0	1	0	0	7	2	5	10	5.66667	6	5	2	5	6	1	4	5	2	2	2	3	5	2	5	2	0	0	1	0	0	0
997	1	High school diploma or GED	1	4	0	0	1	1	0	1	0	1	1	0	1	1	1	1	0	1	1	1	12	0	10	20	10	4	5	4	4	4	2	4	4	4	4	4	4	5	3	5	4	0	0	1	0	0	1
442	2	High school diploma or GED	1	4	0	0	1	1	0	1	0	0	1	0	0	1	0	0	0	1	1	0	7	0	0	0	0	1	1	1	1	1	1	4	4	1	1	1	1	5	1	1	5	1	1	1	0	0	0
81	2	High school diploma or GED	1	2	0	0	0	1	0	1	0	1	1	0	1	1	0	0	0	1	1	1	9	0	0	10	3.33333	6	6	6	6	6	1	6	6	6	5	6	6	6	6	6	1	1	0	1	0	0	0
183	2	Some college (no degree)	1	6	1	0	1	1	0	0	0	0	0	0	1	1	0	1	0	1	1	0	8	5	5	25	11.6667	5	5	6	2	2	2	5	2	2	3	1	1	3	2	1	4	1	1	1	0	0	0
670	2	High school diploma or GED	1	4	0	1	0	1	0	0	1	1	0	0	1	0	1	0	0	0	0	0	6	0	0	10	3.33333	5	5	3	3	4	1	4	4	4	3	4	4	4	3	4	5	1	1	0	0	0	0
456	1	Some college (no degree)	1	5	1	0	0	1	0	1	0	1	0	0	0	1	1	1	0	1	1	0	9	0	10	30	13.3333	5	5	6	5	4	2	4	5	2	2	3	5	2	2	5	4	1	1	0	0	0	0
533	1	Associate's degree	2	4	1	0	0	1	0	0	0	1	1	1	1	1	1	1	0	1	1	1	12	2	2	2	2	4	4	3	4	4	3	4	4	4	3	4	4	4	3	4	4	1	0	0	0	0	0
186	2	Bachelor's degree	2	5	1	0	1	1	0	1	0	1	1	1	1	1	1	1	0	1	1	1	14	2	1	5	2.66667	4	4	4	4	4	3	5	5	3	3	3	6	6	3	5	2	1	0	1	1	0	0
355	2	High school diploma or GED	1	4	0	1	1	0	0	0	0	0	0	0	1	1	0	0	1	1	0	1	7	30	30	30	30	4	4	4	4	4	1	4	4	1	1	1	4	6	1	4	1	0	0	1	0	1	0
185	2	Bachelor's degree	2	3	1	0	1	1	0	0	0	1	1	1	1	1	1	1	0	1	1	1	13	0	0	5	1.66667	3	3	2	2	4	1	1	3	3	3	3	4	2	1	2	1	1	1	1	0	0	0
514	2	Graduate degree	2	4	0	0	0	0	1	0	0	0	0	1	0	0	0	1	0	0	0	0	3	3	3	10	5.33333	2	3	3	3	5	4	2	3	4	5	4	2	3	4	5	3	1	0	0	0	0	0
126	1	High school diploma or GED	1	6	1	0	1	1	1	0	1	1	1	1	0	1	0	0	0	1	0	0	10	0	0	50	16.6667	1	1	1	3	1	1	1	1	1	1	1	5	5	2	5	6	0	0	1	0	0	0
49	2	High school diploma or GED	1	3	1	0	0	0	0	0	0	0	1	0	1	0	0	0	0	0	0	0	3	0	0	0	0	5	4	4	4	4	4	4	4	4	3	4	4	4	4	4	4	1	0	1	0	0	0
497	1	High school diploma or GED	1	4	0	0	1	1	0	0	0	1	0	0	0	0	0	0	0	0	0	1	4	0	0	10	3.33333	6	5	5	5	5	1	6	5	5	5	5	5	5	4	4	5	0	0	0	0	1	0
734	2	High school diploma or GED	1	7	1	0	0	1	0	0	0	0	0	1	0	0	0	0	1	1	0	1	6	5	5	5	5	6	6	6	6	6	1	6	6	6	6	6	6	6	6	6	1	1	0	1	0	0	0
365	1	High school diploma or GED	1	5	0	0	0	1	0	0	0	0	1	0	1	1	1	0	0	0	0	1	6	5	5	10	6.66667	6	6	6	6	6	1	5	6	6	6	6	6	6	6	6	6	1	0	0	0	0	0
872	1	High school diploma or GED	1	4	0	0	1	1	0	0	0	0	0	0	0	0	0	1	1	0	0	1	5	65	55	25	48.3333	6	5	6	5	6	5	6	5	6	6	5	5	6	5	6	5	0	0	0	0	0	1
789	1	Some college (no degree)	1	1	0	1	0	1	0	0	0	1	1	1	0	0	0	0	0	0	0	0	5	0	0	0	0	4	4	4	4	4	2	4	4	4	3	4	4	4	4	4	4	0	0	0	0	0	0
829	1	Some college (no degree)	1	4	1	1	0	1	0	0	0	0	1	1	0	1	0	0	0	1	1	0	8	0	0	15	5	4	4	4	4	4	1	4	4	4	3	2	4	5	4	4	3	1	0	1	1	1	0
78	1	Some college (no degree)	1	4	1	0	0	1	0	0	0	0	1	0	1	1	1	0	0	1	1	0	8	0	0	0	0	2	4	2	4	1	1	4	6	6	5	6	6	6	4	4	4	1	0	1	1	0	0
712	2	High school diploma or GED	1	5	0	1	0	1	0	0	0	1	1	1	0	0	0	0	0	1	1	0	7	5	10	10	8.33333	4	5	4	4	5	4	2	5	2	5	2	4	5	2	4	5	0	0	1	0	0	0
270	1	Some college (no degree)	1	6	0	0	0	0	0	0	0	1	1	0	0	1	1	0	0	1	0	0	5	0	0	0	0	5	4	3	4	5	2	3	4	4	4	5	5	5	5	5	2	1	0	0	0	0	1
882	1	High school diploma or GED	1	4	0	0	0	1	0	0	1	0	0	0	0	1	0	0	0	0	0	0	3	20	30	20	23.3333	4	4	2	3	5	1	2	3	4	4	5	5	2	3	3	4	0	0	0	0	0	0
276	2	Graduate degree	2	2	1	0	0	1	0	0	0	0	1	1	1	1	0	0	0	1	0	0	7	1	10	25	12	4	5	5	3	5	1	4	5	3	3	5	5	5	2	5	2	1	0	0	0	0	0
1016	1	High school diploma or GED	1	5	0	0	0	1	0	1	0	1	1	0	1	1	0	1	0	0	1	0	8	40	30	30	33.3333	6	6	6	6	6	6	6	6	6	6	6	6	6	6	6	6	0	0	0	0	0	0
118	2	Some college (no degree)	1	4	1	0	0	1	0	1	0	1	1	0	1	1	1	1	0	1	1	1	12	0	1	1	0.666667	4	5	5	3	4	2	6	6	6	4	5	5	6	4	5	1	1	1	1	0	0	0
761	1	Some college (no degree)	1	7	1	0	0	0	0	0	0	1	0	1	1	1	1	1	0	0	0	0	7	50	50	100	66.6667	1	3	4	4	6	1	4	5	5	5	5	5	5	5	5	6	1	0	1	1	0	0
400	2	High school diploma or GED	1	4	0	0	0	0	1	0	0	0	0	1	0	0	0	1	0	0	0	0	3	50	50	10	36.6667	3	4	3	4	3	3	3	3	3	4	4	3	4	3	3	3	0	0	1	0	0	0
855	1	High school diploma or GED	1	4	1	0	0	0	0	0	1	0	0	0	0	1	0	0	0	1	0	0	4	55	40	0	31.6667	3	4	5	3	4	4	2	3	3	4	4	3	3	4	6	6	0	0	0	0	0	0
128	2	Some college (no degree)	1	4	0	0	1	1	0	0	0	1	0	0	1	0	0	0	0	0	0	1	5	30	60	20	36.6667	4	4	4	4	4	4	4	4	4	4	4	4	4	5	5	5	1	0	0	0	0	0
480	1	Some college (no degree)	1	4	0	0	0	1	0	0	0	0	0	0	0	1	0	0	0	0	0	0	2	58	62	50	56.6667	4	2	4	6	3	4	5	3	2	4	4	6	2	1	4	4	1	0	0	0	0	0
294	2	Bachelor's degree	2	1	1	0	0	1	0	1	0	1	1	1	1	1	0	0	0	1	1	1	11	0	0	10	3.33333	4	4	4	4	4	2	2	2	2	3	3	2	4	3	2	1	1	0	1	1	1	0
987	1	Bachelor's degree	2	1	1	0	0	1	0	0	0	0	1	1	1	1	0	0	0	1	1	0	8	2	1	5	2.66667	5	5	5	3	3	3	4	4	5	4	5	5	5	4	5	4	1	0	0	1	0	0
43	2	Bachelor's degree	2	5	1	0	0	1	0	0	0	0	1	0	1	1	0	1	0	1	1	0	8	0	10	10	6.66667	5	5	6	5	5	1	5	5	4	4	5	6	6	5	5	5	1	0	0	0	0	0
920	2	Graduate degree	2	1	1	0	0	1	0	1	0	1	1	1	1	1	1	1	0	1	1	1	13	0	1	5	2	4	4	3	3	2	1	5	3	3	2	2	5	5	2	4	1	1	1	1	1	1	1
322	2	Some college (no degree)	1	5	0	0	0	1	0	0	1	0	1	0	0	1	0	0	0	0	0	0	4	25	24	25	24.6667	4	3	3	4	3	4	1	4	4	4	4	4	3	3	3	3	0	0	0	0	0	0
546	1	Less than high school diploma	1	4	0	1	0	0	0	0	0	0	0	1	0	1	0	1	1	1	0	0	6	0	0	0	0	4	4	4	4	4	4	4	4	4	4	4	4	4	4	4	4	1	0	0	0	0	0
930	2	Some college (no degree)	1	2	1	0	0	1	0	0	0	0	1	1	0	0	0	0	0	1	0	0	5	50	30	19	33	6	4	3	5	6	6	6	6	4	5	5	5	5	5	4	5	0	0	0	0	0	0
608	2	High school diploma or GED	1	4	1	0	0	0	0	0	1	0	1	1	0	1	1	0	0	0	0	1	7	80	79	90	83	4	4	5	6	6	6	5	5	5	6	6	6	6	5	5	5	1	0	0	0	0	0
867	2	Some college (no degree)	1	2	0	0	0	0	0	0	0	0	0	0	0	0	0	0	0	1	1	0	2	30	10	2	14	4	5	4	5	4	4	4	5	3	1	5	5	5	2	3	3	1	0	0	0	0	0
956	2	High school diploma or GED	1	5	0	0	0	1	0	0	0	0	1	0	0	1	1	0	0	1	0	0	5	0	0	20	6.66667	4	5	5	5	3	1	1	5	3	1	1	5	2	1	1	6	0	0	0	0	0	0
803	1	High school diploma or GED	1	6	1	0	1	1	0	1	0	1	1	0	0	0	0	0	0	0	1	1	8	10	20	90	40	2	2	3	4	3	2	3	4	5	4	3	3	3	5	4	3	1	0	1	0	1	0
1017	2	Some college (no degree)	1	1	1	1	0	1	0	0	0	0	0	1	0	0	0	0	0	0	0	1	5	50	25	30	35	6	6	6	6	6	6	6	6	6	6	6	6	6	6	6	6	1	0	0	0	0	0
590	1	Some college (no degree)	1	4	0	1	0	0	1	0	0	0	0	1	1	0	0	0	0	0	0	0	4	80	50	8	46	4	4	4	3	3	3	4	4	4	2	4	5	3	2	4	4	0	0	0	0	0	0
359	2	Some college (no degree)	1	5	0	0	0	1	0	1	0	0	1	0	0	0	0	0	0	0	0	0	3	100	0	0	33.3333	6	3.5	3.5	3.5	3.5	3.5	3.5	3.5	3.5	3.5	3.5	3.5	3.5	3.5	3.5	3.5	0	0	0	0	0	0
748	1	High school diploma or GED	1	4	0	0	1	0	0	0	0	1	1	1	1	1	1	1	0	1	1	0	10	0	0	0	0	4	4	4	4	4	4	4	4	4	4	4	4	4	4	4	4	0	0	1	0	0	0
850	1	Some college (no degree)	1	2	1	0	0	1	1	0	0	0	0	1	0	1	0	1	0	0	0	0	6	25	30	25	26.6667	4	3	4	4	3	4	4	4	3	4	4	4	3	3	4	4	1	0	0	0	0	0
370	2	Some college (no degree)	1	6	1	0	1	1	0	0	0	0	0	1	0	1	1	0	0	0	0	0	6	20	10	5	11.6667	2	2	2	2	2	2	2	2	2	2	2	2	2	2	2	2	0	0	0	0	0	0
331	1	Some college (no degree)	1	3	1	0	1	1	0	0	0	0	1	1	1	0	0	0	0	1	0	0	7	7	10	4	7	4	4	2	6	6	5	3	3	3	3	1	1	3	6	6	2	0	0	0	0	0	0
92	1	Some college (no degree)	1	1	0	0	0	1	0	0	1	0	0	0	0	0	0	1	0	0	0	0	3	10	10	10	10	3	5	6	6	5	6	6	5	6	5	6	6	6	6	5	6	0	0	0	0	0	0
521	2	High school diploma or GED	1	4	1	0	0	1	1	0	0	1	1	1	1	1	0	1	0	1	1	1	12	4	5	15	8	6	6	2	2	5	1	5	5	2	2	4	6	5	3	5	5	0	0	1	0	0	0
387	2	Some college (no degree)	1	4	0	0	0	1	0	0	0	1	0	0	1	0	1	0	0	1	0	0	5	20	50	60	43.3333	2	2	2	2	4	5	6	4	3	2	2	3	2	4	4	3	1	0	0	0	0	0
430	2	Some college (no degree)	1	4	0	1	1	1	0	0	0	0	0	1	1	1	0	0	0	1	0	0	7	0	0	1	0.333333	6	6	6	6	6	6	6	6	6	6	6	6	6	6	6	6	1	0	0	0	0	1
242	1	Some college (no degree)	1	4	0	0	0	1	0	0	0	0	0	0	0	0	0	0	0	0	0	1	2	30	20	5	18.3333	2	2	2	2	4	1	2	3	3	2	5	4	2	2	4	3	0	0	0	0	0	0
414	2	High school diploma or GED	1	4	1	1	0	1	0	0	0	0	1	0	0	1	0	0	0	0	1	0	6	50	25	60	45	5	4	3	4	5	1	4	4	3	2	4	5	6	2	5	5	0	0	1	0	0	0
673	1	Some college (no degree)	1	4	1	0	0	0	0	0	0	1	1	0	1	1	0	0	0	1	0	0	6	5	1	5	3.66667	4	3	3	3	4	2	4	4	4	3	4	4	4	4	4	3	1	1	0	0	1	0
447	2	Some college (no degree)	1	1	1	0	1	1	0	0	0	0	1	0	1	1	0	0	0	1	1	0	8	2	1	2	1.66667	5	5	4	6	6	2	4	5	4	3	5	5	6	3	6	4	1	0	0	0	0	0
262	1	Some college (no degree)	1	3	0	0	1	1	0	0	0	0	1	0	1	0	0	0	0	1	0	0	5	0	0	10	3.33333	6	6	6	6	6	1	5	6	6	3	6	6	6	6	6	3	1	0	1	1	0	0
142	1	Some college (no degree)	1	4	1	0	1	1	0	0	0	1	1	1	1	1	1	0	0	1	1	0	11	0	0	10	3.33333	5	4	2	5	5	1	4	4	2	1	4	6	4	2	6	1	0	0	0	0	0	0
532	1	Some college (no degree)	1	5	1	0	0	1	0	0	0	1	1	1	1	1	0	1	0	0	0	0	8	0	0	30	10	5	6	6	6	3	1	1	2	5	4	6	6	6	3	5	6	0	0	0	0	0	0
168	1	Some college (no degree)	1	1	1	0	0	1	0	0	0	1	1	1	1	0	1	0	0	1	0	1	9	5	2	80	29	4	4	4	4	5	2	4	4	4	4	4	5	3	4	5	3	1	0	1	0	0	0
307	1	Some college (no degree)	1	1	1	0	0	1	0	0	0	1	0	1	1	1	1	0	0	1	1	0	9	0	0	0	0	5	5	4	3	2	1	4	6	3	3	4	6	5	5	5	1	1	0	1	1	1	0
26	1	Bachelor's degree	2	5	1	0	0	1	0	1	0	1	1	1	1	1	1	0	0	1	1	0	11	0	2	70	24	1	3	2	2	2	2	2	2	2	2	3	2	2	2	2	2	1	0	0	0	0	0
652	1	Less than high school diploma	1	4	0	0	0	1	0	0	0	1	0	1	0	0	1	0	0	1	1	0	6	10	10	50	23.3333	4	4	6	4	1	4	6	6	5	4	4	4	4	4	4	6	1	0	1	0	0	1
360	2	Less than high school diploma	1	5	0	1	0	0	0	0	0	0	0	0	0	0	0	0	0	0	0	0	1	20	50	50	40	5	5	4	4	5	5	4	3	5	4	5	5	4	5	4	4	0	0	0	0	0	0
348	2	High school diploma or GED	1	4	0	0	0	1	0	0	0	0	1	0	0	1	0	0	0	0	1	0	4	20	10	10	13.3333	4	3	4	5	3	4	4	3	4	5	4	3	5	4	5	4	0	0	0	0	0	0
303	2	High school diploma or GED	1	7	1	0	0	1	0	0	0	0	1	1	1	1	0	0	0	0	1	1	8	0	0	0	0	5	5	5	5	5	1	5	5	5	5	5	5	5	5	5	5	1	0	1	0	0	0
843	1	High school diploma or GED	1	5	1	0	0	1	1	0	0	1	1	1	1	0	0	1	0	0	0	0	8	0	0	15	5	5	4	6	6	4	4	5	5	6	6	4	5	6	5	5	6	1	0	0	0	0	0
62	1	High school diploma or GED	1	2	0	0	0	1	0	0	0	0	1	0	1	0	1	1	0	1	1	0	7	0	0	0	0	5	5	5	1	5	1	5	1	1	4	5	5	5	1	5	3	0	0	1	0	0	0
713	1	High school diploma or GED	1	6	1	0	0	1	1	1	0	1	1	1	1	1	0	1	0	1	1	0	12	0	0	25	8.33333	3	3	3	5	5	2	2	2	3	3	5	5	3	3	5	3	0	1	1	0	0	0
856	2	Some college (no degree)	1	6	0	0	0	1	0	0	1	0	0	1	0	0	0	0	0	0	0	0	3	25	20	20	21.6667	3	3	4	4	4	2	2	4	4	4	2	2	2	4	3	4	1	0	1	0	0	0
780	2	Some college (no degree)	1	6	0	0	0	1	0	0	0	1	1	1	1	0	0	0	0	0	0	0	5	10	5	10	8.33333	4	6	6	6	6	2	1	4	3	6	4	6	6	4	6	1	0	0	0	0	0	0
848	1	Some college (no degree)	1	5	0	1	0	1	0	0	0	1	0	1	0	1	1	0	0	1	1	0	8	0	10	10	6.66667	3	3	5	5	3	1	3	3	3	3	4	5	3	3	3	5	1	0	1	0	0	1
563	2	Some college (no degree)	1	4	1	0	0	1	0	0	0	0	0	1	0	0	0	0	1	0	1	0	5	10	5	20	11.6667	4	5	5	4	6	5	6	5	5	5	6	5	4	5	5	4	1	0	1	0	0	0
38	1	High school diploma or GED	1	3	0	0	0	1	0	1	0	1	1	1	0	0	0	0	0	1	1	0	7	0	5	5	3.33333	5	4	4	4	5	2	5	4	3	3	3	5	4	3	4	6	1	1	0	0	0	0
877	2	Some college (no degree)	1	4	1	0	1	1	0	0	0	1	1	1	1	1	0	1	0	1	1	1	12	0	0	9	3	3	3	4	3	3	2	3	4	3	2	3	4	1	6	3	1	1	0	0	1	0	0
618	1	Some college (no degree)	1	1	1	0	1	1	0	0	0	1	1	1	1	1	0	0	0	1	1	1	11	0	0	0	0	3	3	1	4	3	1	3	5	3	1	4	3	5	2	4	2	1	0	1	0	0	0
271	2	Some college (no degree)	1	3	1	0	0	1	0	0	0	0	1	1	1	0	0	1	0	1	0	0	7	5	5	10	6.66667	5	5	3	4	2	3	5	5	3	3	5	5	5	2	5	3	0	0	1	0	0	1
131	1	Some college (no degree)	1	4	0	0	0	1	0	0	0	0	1	0	1	1	0	1	0	1	0	0	6	5	10	1	5.33333	4	4	4	4	4	4	4	4	4	4	4	4	4	4	4	4	0	0	0	0	0	0
409	1	Some college (no degree)	1	1	0	0	1	1	0	0	0	1	0	0	0	0	0	0	1	0	0	0	4	40	30	100	56.6667	5	5	5	5	5	5	5	5	5	5	5	5	5	5	5	5	0	0	0	0	0	0
324	1	Some college (no degree)	1	1	0	0	0	1	0	0	0	1	0	0	0	0	0	0	1	1	1	0	5	50	20	30	33.3333	5	4	4	2	3	3	5	4	2	5	5	4	3	4	2	3	0	0	0	0	0	0
209	1	Some college (no degree)	1	2	1	0	0	1	0	0	0	0	1	1	1	0	1	0	0	1	0	1	8	0	0	0	0	6	6	5	5	5	1	5	5	5	5	4	6	6	5	4	2	0	1	0	0	0	0
726	1	Some college (no degree)	1	4	1	0	0	1	0	0	1	1	0	0	1	0	0	1	0	0	0	0	6	30	25	25	26.6667	2	2	5	5	5	2	5	4	4	5	3	4	2	5	5	2	1	1	1	0	0	0
873	2	Some college (no degree)	1	4	0	0	0	0	0	0	0	0	0	0	0	0	0	0	0	0	0	0	0	50	50	50	50	2	4	4	2	4	4	4	5	1	4	4	5	1	5	4	4	0	0	0	0	0	0
741	2	Some college (no degree)	1	4	1	0	1	1	0	1	0	0	1	0	1	1	0	0	0	1	1	0	9	0	0	100	33.3333	2	3	3	6	6	1	3	5	4	5	3	4	3	3	5	4	1	0	0	0	0	0
846	1	Some college (no degree)	1	1	1	1	0	1	0	0	0	1	1	1	1	1	0	0	0	1	1	1	11	5	2	10	5.66667	5	6	2	2	1	1	5	4	3	1	4	5	6	3	5	1	1	1	1	1	1	1
129	1	Some college (no degree)	1	4	1	0	0	1	0	0	0	0	1	0	1	0	0	0	0	0	1	0	5	0	0	0	0	4	4	3	6	6	1	1	1	1	1	1	1	6	1	2	1	0	1	1	0	0	0
172	2	Associate's degree	2	4	1	0	0	1	1	0	0	1	0	0	1	0	0	1	0	1	1	0	8	2	5	75	27.3333	4	4	2	2	4	1	2	3	3	2	2	5	5	3	3	2	0	1	1	0	0	0
16	2	Bachelor's degree	2	4	1	0	1	0	0	0	0	0	0	0	1	0	0	1	0	1	0	0	5	0	0	0	0	6	6	6	6	6	1	6	6	6	6	6	6	3.5	6	6	6	1	0	0	0	0	0
938	1	Less than high school diploma	1	6	0	0	0	1	0	1	0	0	0	1	0	0	0	0	0	0	0	0	3	50	50	50	50	4	4	4	4	4	4	4	4	4	4	4	4	4	4	4	4	0	0	0	0	0	0
968	2	Some college (no degree)	1	3	0	0	0	1	0	0	0	0	0	0	1	0	0	0	0	1	1	0	4	10	40	50	33.3333	6	6	6	6	6	6	6	6	6	6	6	6	6	6	6	6	0	0	1	0	0	0
1029	1	Less than high school diploma	1	7	0	1	0	1	0	0	0	1	1	1	1	0	1	0	0	0	0	0	7	0	0	9	3	4	3	4	1	1	1	1	1	2	2	4	3	3	3	4	3	0	0	0	0	0	0
677	1	Less than high school diploma	1	4	1	0	1	1	0	0	0	0	1	0	1	1	0	0	0	0	1	1	8	10	15	0	8.33333	5	5	5	5	5	4	5	5	4	5	5	5	6	5	5	5	0	0	0	0	0	0
215	1	High school diploma or GED	1	2	0	0	0	1	0	0	0	0	0	0	0	0	0	0	0	0	0	0	1	25	15	0	13.3333	6	6	4	3	5	1	3	6	5	6	6	6	1	3	6	6	0	0	0	0	0	0
408	2	Some college (no degree)	1	4	0	0	1	1	0	1	0	0	1	0	0	1	1	0	0	1	1	0	8	10	0	0	3.33333	5	5	5	5	4	3	4	5	4	4	4	5	4	5	4	4	1	0	0	0	0	0
250	2	Some college (no degree)	1	4	0	0	0	1	0	0	0	0	1	1	0	1	0	1	1	0	0	0	6	10	10	10	10	4	4	5	5	6	5	4	6	5	4	2	4	6	5	4	4	1	0	0	0	0	0
357	2	Some college (no degree)	1	4	0	0	0	1	0	0	0	0	0	0	1	1	0	0	0	0	0	1	4	0	0	20	6.66667	4	4	3	3	4	1	3	3	4	2	2	3	4	3	3	4	1	0	0	0	0	0
733	2	High school diploma or GED	1	2	0	0	1	1	0	0	1	1	1	1	1	1	0	0	0	1	0	0	9	0	0	0	0	5	6	6	6	6	2	3	5	5	5	6	6	6	4	6	6	1	0	1	0	0	0
774	1	Some college (no degree)	1	7	0	0	0	0	0	1	0	0	0	0	0	1	0	0	0	1	1	0	4	10	10	10	10	1	1	1	1	1	1	1	1	1	1	1	1	1	1	1	1	1	0	0	0	0	0
728	1	Some college (no degree)	1	3	0	0	0	1	0	1	0	1	1	1	1	1	0	0	0	1	0	0	8	40	30	30	33.3333	2	2	3	3	4	2	4	4	3	2	2	4	2	3	3	4	0	1	0	0	0	0
105	2	Some college (no degree)	1	4	1	0	0	0	0	0	0	0	0	0	0	1	0	1	1	1	0	0	5	40	30	50	40	4	4	4	4	4	4	4	4	4	4	4	4	4	5	5	3	0	0	1	0	0	0
267	1	High school diploma or GED	1	5	1	0	0	1	0	0	1	1	1	1	1	1	0	1	0	1	1	1	12	0	0	20	6.66667	5	5	6	5	5	1	5	5	5	5	5	5	5	4	6	4	1	1	1	0	0	1
868	2	Some college (no degree)	1	4	1	0	0	1	1	1	0	1	1	0	1	1	1	1	0	1	1	1	13	3	5	0	2.66667	4	3	4	5	5	4	4	3	4	4	3	3	5	3	6	2	0	0	1	1	0	0
136	1	Some college (no degree)	1	2	0	0	0	1	0	0	0	1	0	0	0	0	0	0	0	0	0	0	2	50	50	50	50	4	5	5	4	5	5	4	4	4	5	5	2	6	4	5	5	0	0	0	0	0	0
614	2	Some college (no degree)	1	3	1	0	0	1	0	0	0	0	1	0	1	1	1	1	0	1	1	0	9	0	0	0	0	6	5	2	2	3	1	5	4	3	1	4	6	5	4	4	5	1	0	1	0	0	0
148	2	Some college (no degree)	1	6	1	0	0	0	0	0	1	1	1	0	0	0	0	0	0	0	1	0	5	75	75	60	70	3	4	4	4	4	4	4	4	4	4	4	3	4	4	4	4	1	0	0	0	0	0
986	1	Some college (no degree)	1	2	0	0	0	1	0	0	0	0	0	0	1	1	0	0	0	1	1	0	5	100	0	10	36.6667	4	5	3	6	6	1	1	4	3.5	3	5	6	6	3	4	5	1	0	0	0	0	0
254	2	Some college (no degree)	1	4	1	0	0	1	0	0	0	0	0	0	1	0	1	0	0	0	0	0	4	0	0	1	0.333333	4	5	6	6	6	2	6	6	6	5	6	6	6	6	6	1	1	0	1	0	0	0
120	1	Some college (no degree)	1	2	0	0	1	1	0	0	0	1	0	1	0	1	0	0	0	1	1	0	7	5	2	10	5.66667	5	6	2	4	4	1	4	5	2	1	3	6	6	1	4	3	0	0	0	1	0	0
762	1	Some college (no degree)	1	6	1	0	0	1	0	1	0	0	1	0	1	1	1	0	0	1	1	0	9	0	0	0	0	4	5	4	5	5	1	4	3	4	5	5	5	5	3	6	4	1	1	1	0	0	0
585	2	Bachelor's degree	2	2	0	1	0	0	0	0	0	1	0	1	0	0	0	0	1	0	0	0	4	0	0	100	33.3333	5	5	5	5	5	5	5	5	5	5	5	5	5	5	5	5	0	0	1	0	0	0
696	1	Graduate degree	2	7	1	0	0	1	0	0	0	1	1	1	1	1	1	0	0	1	1	1	11	0	0	40	13.3333	3	3	6	6	2	2	4	4	4	4	4	4	4	3	6	6	1	1	1	0	0	0
478	2	High school diploma or GED	1	4	0	0	0	1	0	0	0	1	0	1	1	1	0	0	0	0	1	0	6	8	20	60	29.3333	4	3	3	4	4	2	2	3	4	3	4	4	3	3	4	3	1	0	1	0	0	0
642	1	High school diploma or GED	1	7	1	0	1	1	0	0	0	1	0	1	1	1	1	1	0	1	1	0	11	10	10	10	10	4	4	5	5	4	2	3	5	4	2	4	5	5	2	5	4	1	0	1	0	0	1
559	1	Some college (no degree)	1	4	0	0	1	1	0	0	0	1	1	1	1	0	0	0	0	1	1	0	8	0	0	10	3.33333	4	4	2	4	4	4	4	4	4	4	4	5	5	3	4	2	0	0	0	0	0	0
265	2	High school diploma or GED	1	5	0	0	0	1	0	0	0	0	0	1	1	0	0	0	0	1	1	0	5	0	5	80	28.3333	5	5	3	3	5	1	3	3	4	4	4	4	4	4	4	4	1	1	1	0	0	0
925	1	High school diploma or GED	1	4	1	0	0	1	0	1	0	1	1	1	1	1	0	0	0	1	1	1	11	10	20	10	13.3333	6	6	3	5	2	1	6	5	3	2	2	6	6	3	3	2	1	1	1	0	1	0
961	1	Some college (no degree)	1	4	0	0	0	0	0	0	0	1	0	1	0	0	0	0	0	0	0	0	2	70	75	90	78.3333	4	3	4	4	3	6	5	4	4	2	2	5	4	4	4	4	1	0	0	0	0	0
883	2	Some college (no degree)	1	3	0	0	0	1	0	0	0	0	0	0	1	1	0	0	0	0	0	0	3	50	50	90	63.3333	3	3	3	3	3	3	3	3	3	3	3	3	3	3	5	4	0	1	0	0	0	0
290	1	Some college (no degree)	1	4	0	1	0	1	0	0	1	0	0	1	1	1	0	1	0	1	0	0	8	10	10	5	8.33333	1	4	4	4	4	1	4	4	2	3	4	4	5	3	5	5	1	0	1	0	0	0
571	2	Some college (no degree)	1	4	1	0	0	1	0	0	0	1	1	1	0	1	0	0	0	1	1	0	8	0	0	10	3.33333	6	6	4	2	4	1	5	5	4	1	2	5	5	5	3	1	1	0	1	0	0	0
463	1	High school diploma or GED	1	6	1	0	0	1	0	0	0	1	1	0	0	0	1	0	0	1	1	0	7	50	50	20	40	4	4	5	2	2	2	4	4	4	4	2	2	2	4	2	5	0	0	1	0	1	0
482	2	Some college (no degree)	1	3	1	0	0	1	0	0	0	1	1	1	1	1	0	0	0	1	1	0	9	50	10	25	28.3333	5	5	4	2	2	1	4	2	2	4	2	1	2	3	4	5	0	0	0	0	0	0
804	2	Some college (no degree)	1	3	1	0	0	0	0	0	0	0	0	0	0	0	0	0	0	1	0	0	2	40	35	40	38.3333	5	4	2	5	2	2	4	5	3	2	5	5	5	4	5	5	0	0	1	0	0	0
708	1	Some college (no degree)	1	6	0	1	1	0	0	0	0	0	0	0	1	0	0	0	0	0	0	0	3	25	15	15	18.3333	4	3	4	5	5	2	2	5	5	3	5	5	5	5	5	6	0	0	1	0	0	0
1002	2	Some college (no degree)	1	6	1	0	1	1	0	1	0	1	1	1	1	1	1	1	1	1	1	0	14	2	10	20	10.6667	3	3	4	5	2	1	1	1	1	4	1	1	5	3	6	4	1	0	1	0	1	0
530	2	Some college (no degree)	1	4	1	0	0	1	0	0	0	0	0	1	0	0	1	0	0	0	0	0	4	10	10	10	10	5	4	5	5	5	2	5	5	5	5	5	5	6	5	5	5	0	0	0	0	0	0
199	2	Associate's degree	2	3	1	0	1	1	0	0	0	1	1	1	1	1	0	1	0	1	1	0	11	0	5	10	5	2	3	2	3	2	1	1	3	1	1	2	4	5	1	4	2	1	1	1	1	1	0
293	1	Associate's degree	2	3	1	0	1	1	0	0	0	0	1	1	1	1	1	1	0	1	1	0	11	0	0	50	16.6667	2	5	3	4	5	1	2	4	2	3	3	3	6	2	5	1	1	0	1	0	1	0
468	1	Some college (no degree)	1	3	1	0	0	1	0	0	0	1	1	1	1	0	0	0	0	1	1	0	8	0	0	25	8.33333	4	5	5	5	3	2	4	4	5	3	4	6	6	3	4	3	0	0	0	0	0	0
874	1	Bachelor's degree	2	3	1	0	1	0	0	0	0	0	0	1	0	0	1	0	0	0	0	1	5	57	69	9	45	6	5	4	5	6	5	4	6	6	5	4	5	5	6	5	4	1	0	0	0	1	0
485	2	Some college (no degree)	1	1	1	0	0	1	1	0	0	1	0	1	1	0	0	0	0	1	0	0	7	0	0	20	6.66667	6	6	6	4	6	1	6	5	4	4	5	5	5	5	5	3	0	0	1	0	0	0
356	1	Bachelor's degree	2	4	0	0	1	1	0	0	0	0	0	1	1	1	0	0	0	1	1	0	7	0	2	5	2.33333	5	6	6	6	6	1	6	6	3	3	5	6	6	5	6	6	1	1	1	1	1	0
266	1	Graduate degree	2	7	0	0	0	1	0	1	0	1	1	0	1	1	1	1	0	1	1	0	10	0	0	0	0	3	3	5	6	5	1	5	5	5	4	5	5	5	5	5	6	1	0	0	0	0	1
310	1	Some college (no degree)	1	4	1	1	1	0	0	0	0	1	0	0	0	0	1	0	0	1	1	0	7	5	1	1	2.33333	5	5	6	3	4	3	4	6	6	4	6	6	4	2	5	5	0	0	0	0	0	0
70	1	Graduate degree	2	2	1	0	0	1	0	1	0	1	1	1	1	1	0	0	0	1	1	1	11	0	0	0	0	4	6	5	4	5	4	6	6	5	4	5	6	6	4	6	6	0	1	1	1	1	1
123	2	Some college (no degree)	1	4	0	0	1	1	0	0	0	1	1	1	1	1	1	0	0	1	0	0	9	5	5	50	20	6	6	2	5	6	1	1	6	1	1	1	6	6	1	5	1	0	0	0	0	0	0
257	2	Less than high school diploma	1	1	0	0	0	0	0	0	0	0	0	1	1	0	0	0	0	0	0	0	2	0	2	10	4	4	5	5	5	4	1	1	4	5	3	4	5	4	5	5	6	0	0	0	0	1	0
805	1	High school diploma or GED	1	6	0	0	0	1	0	0	0	0	0	0	0	0	0	0	0	0	0	0	1	1	1	1	1	5	5	4	4	5	3	5	4	4	3	3	3	3	4	3	4	0	0	0	0	0	0
23	2	Associate's degree	2	2	1	0	0	1	0	0	0	1	1	1	1	1	0	1	0	1	1	0	10	0	0	50	16.6667	5	4	3	5	5	1	4	5	4	4	5	5	5	4	5	4	1	1	1	1	0	0
798	1	Bachelor's degree	2	3	1	0	0	1	0	1	1	0	1	1	1	1	0	1	0	1	1	0	11	100	50	50	66.6667	1	1	1	1	1	1	1	1	1	1	1	1	1	1	1	1	1	0	1	1	0	0
200	2	Some college (no degree)	1	6	1	0	0	1	0	1	0	1	1	1	0	1	0	0	0	0	0	1	8	0	0	50	16.6667	5	5	3	4	5	2	2	4	4	5	4	6	5	3	3	4	1	0	0	0	0	0
669	2	Graduate degree	2	1	0	0	0	1	0	0	0	0	1	0	0	1	0	1	0	1	1	0	6	5	5	25	11.6667	2	4	2	3	1	1	2	3	3	3	1	3	4	3	2	1	1	1	1	0	0	0
931	2	Some college (no degree)	1	4	0	0	0	0	0	0	0	0	0	0	0	0	0	0	0	1	0	1	2	30	50	40	40	5	6	4	4	5	2	2	4	4	4	5	5	4	4	2	3	0	0	0	0	0	0
603	1	Some college (no degree)	1	4	0	1	1	0	0	0	0	0	0	1	0	0	0	0	0	0	0	0	3	0	20	50	23.3333	6	5	5	6	3	1	4	2	6	4	2	3	6	5	6	5	0	0	0	0	0	0
220	2	Some college (no degree)	1	4	0	0	0	1	0	0	0	0	1	0	1	1	0	0	0	0	0	1	5	50	0	0	16.6667	5	4	4	4	4	4	4	4	4	4	4	4	4	4	4	3	0	0	0	0	0	0
252	1	High school diploma or GED	1	4	0	0	1	1	0	0	0	0	0	0	0	0	0	0	0	1	0	0	3	0	0	10	3.33333	4	4	4	4	4	4	4	4	4	4	4	4	4	4	4	4	1	0	1	0	0	0
283	2	High school diploma or GED	1	4	0	1	0	0	0	0	0	0	1	0	1	1	0	1	0	0	1	0	6	10	10	8	9.33333	5	4	5	5	5	3	5	3	5	3	3	5	6	6	5	6	1	0	0	0	0	0
525	2	High school diploma or GED	1	4	0	0	1	1	1	0	0	0	0	0	0	0	0	0	0	0	0	1	4	0	0	0	0	2	5	6	1	1	1	1	1	1	1	1	1	1	1	1	1	1	0	0	0	1	0
767	1	Some college (no degree)	1	4	0	0	0	1	0	0	0	1	0	0	0	1	0	0	0	1	1	0	5	2	1	5	2.66667	4	5	4	5	5	2	2	5	3	2	3	4	6	4	3	6	1	0	0	0	0	0
146	1	Some college (no degree)	1	5	1	0	0	0	0	0	0	1	1	1	1	1	0	0	0	1	1	0	8	0	0	1	0.333333	4	4	4	5	4	3	4	4	4	4	5	5	5	5	4	5	0	0	0	0	0	0
836	1	Some college (no degree)	1	4	0	0	0	1	0	0	0	0	1	0	0	0	0	0	0	1	1	0	4	20	20	10	16.6667	4	6	1	4	6	1	4	4	4	2	1	6	6	3	6	1	0	0	0	0	0	0
851	2	Some college (no degree)	1	1	1	0	1	1	1	0	0	0	1	1	1	0	1	1	0	1	1	1	12	5	15	10	10	5	6	3	3	3	3	5	5	6	2	4	5	6	4	6	2	0	0	0	0	0	0
73	2	Bachelor's degree	2	4	1	0	0	1	0	1	0	1	1	1	1	1	1	0	1	1	0	1	12	100	2	0	34	3	4	3	3	4	4	4	4	3	3	4	4	4	3	4	4	0	0	0	0	0	0
31	2	Bachelor's degree	2	5	0	0	0	1	0	0	1	0	0	0	1	1	0	0	0	1	1	0	6	0	2	5	2.33333	2	2	2	4	5	2	4	5	5	4	5	5	4	3	5	2	0	1	1	0	0	0
979	2	Some college (no degree)	1	4	0	0	1	1	0	0	0	1	0	0	1	1	1	0	0	1	1	0	8	5	0	10	5	5	5	4	5	5	1	4	5	3	4	3	5	5	4	6	4	1	0	0	0	0	1
259	2	Bachelor's degree	2	1	1	0	1	1	0	0	0	1	1	0	1	0	1	1	0	1	1	0	10	0	2	50	17.3333	6	6	2	3	4	1	5	5	4	4	5	5	6	1	5	1	1	0	1	0	0	0
346	1	Less than high school diploma	1	4	0	1	0	1	0	0	0	0	1	0	1	0	0	0	1	0	0	1	6	5	2	8	5	6	6	6	6	6	6	6	6	6	6	6	6	6	6	6	6	0	0	0	0	0	1
312	1	Less than high school diploma	1	6	1	0	1	1	0	0	1	0	0	0	1	0	0	0	0	0	0	0	5	1	1	10	4	6	5	5	4	5	5	4	5	5	4	5	4	3	3	4	4	0	0	1	0	0	0
426	1	Some college (no degree)	1	4	1	0	0	1	0	0	0	1	0	1	0	1	1	0	0	1	0	0	7	40	10	5	18.3333	3	3	2	3	4	1	2	3	2	2	2	3	5	2	4	1	1	0	1	1	0	0
58	1	High school diploma or GED	1	6	1	0	0	1	0	0	1	0	1	1	0	1	0	0	0	1	1	0	8	100	0	0	33.3333	5	5	5	5	5	1	5	5	5	5	5	5	5	5	5	5	0	0	0	0	0	0
615	1	Some college (no degree)	1	6	0	0	0	1	1	0	1	0	1	0	0	0	0	0	0	0	0	0	4	50	50	50	50	3	3	3	3	3	3	3	3	3	3	3	3	3	4	4	3	1	0	1	0	0	0
305	1	Some college (no degree)	1	4	1	0	0	1	0	0	0	0	1	1	0	1	0	0	0	1	0	0	6	10	10	25	15	3	3	5	5	5	3	4	5	5	3	5	5	5	5	5	5	1	0	0	0	0	0
71	2	Some college (no degree)	1	7	0	0	0	1	0	0	0	0	1	1	0	0	0	0	1	1	1	0	6	40	50	0	30	1	1	1	1	2	1	1	1	1	2	1	6	2	1	1	1	1	0	1	0	0	1
597	1	Some college (no degree)	1	6	1	0	1	1	0	0	0	0	1	0	1	1	1	1	0	1	1	0	10	0	0	0	0	1	2	1	4	5	1	1	4	4	3	4	4	4	4	4	5	1	0	1	0	0	0
511	1	Some college (no degree)	1	4	0	0	0	1	0	1	0	0	1	1	0	0	0	0	0	1	1	0	6	0	0	1	0.333333	6	6	6	6	6	6	6	6	6	6	6	6	6	6	6	5	1	1	1	0	1	0
334	2	Some college (no degree)	1	6	1	0	1	0	0	0	0	1	1	1	1	1	1	1	0	1	1	1	12	25	10	20	18.3333	4	4	4	4	4	4	4	4	4	3	4	3	4	3	4	3	1	0	1	0	0	0
187	1	Some college (no degree)	1	7	0	0	1	1	0	1	0	1	1	1	1	1	1	1	0	0	1	0	11	1	10	25	12	4	5	1	1	5	1	4	5	1	1	5	5	5	1	4	6	1	1	1	1	1	0
561	2	Some college (no degree)	1	4	1	0	0	0	1	0	0	0	0	0	0	0	0	0	0	0	0	0	2	20	20	20	20	3	3	3	3	3	3	3	3	3	3	3	3	3	3	3	3	0	0	0	0	0	0
470	1	Some college (no degree)	1	5	1	0	1	1	0	1	1	0	1	0	1	1	0	1	0	1	1	1	12	0	0	0	0	6	4	3	6	6	2	6	6	6	6	6	6	6	6	6	6	0	0	0	0	0	0
702	2	Associate's degree	2	6	0	0	0	1	0	1	0	0	0	1	1	1	0	1	0	1	0	0	7	5	5	10	6.66667	5	5	5	4	5	3	4	5	5	4	4	5	6	4	4	6	1	1	1	1	0	0
279	2	Bachelor's degree	2	6	1	0	0	1	0	1	0	1	0	1	1	1	0	1	0	1	1	0	10	0	0	75	25	4	4	3	5	4	2	3	5	5	3	4	5	5	4	5	4	1	0	1	0	0	0
21	1	Bachelor's degree	2	1	1	0	1	1	0	0	0	1	0	0	1	1	0	1	0	1	0	1	9	0	0	20	6.66667	2	5	2	2	2	3	3	3	3	3	3	3	3	3	3	1	1	0	0	0	0	0
704	1	High school diploma or GED	1	2	1	0	1	0	0	0	0	0	1	0	0	1	1	1	0	1	1	0	8	0	10	25	11.6667	4	4	5	6	5	2	4	5	5	5	6	6	6	6	6	3	0	0	0	0	0	0
345	1	Some college (no degree)	1	4	0	1	0	0	0	0	1	0	0	1	0	0	1	0	0	0	0	0	4	50	75	50	58.3333	3	5	5	5	5	4	5	5	5	5	5	5	5	5	5	6	0	0	0	0	0	0
207	1	High school diploma or GED	1	4	1	0	0	1	0	1	0	1	0	0	0	0	0	0	0	1	1	1	7	0	0	0	0	3	4	5	6	6	1	6	6	6	4	6	6	6	6	6	1	1	0	1	0	0	0
152	2	Bachelor's degree	2	1	1	0	0	1	0	0	0	1	0	0	0	0	0	1	0	1	1	0	6	55	25	35	38.3333	3	2	2	4	3	2	2	4	2	2	2	2	2	2	3	4	0	0	1	0	0	1
619	2	Bachelor's degree	2	7	0	0	0	1	0	0	0	1	0	1	0	1	1	0	0	0	0	0	5	1	1	1	1	1	1	6	6	6	1	6	4	4	4	4	4	6	5	1	6	0	1	1	0	0	0
977	1	Bachelor's degree	2	7	1	0	1	1	0	1	0	1	1	0	0	0	0	0	0	0	1	0	7	2	2	2	2	5	6	1	1	1	1	4	6	2	3	1	5	6	2	2	2	1	0	1	1	1	1
432	1	High school diploma or GED	1	4	0	1	1	0	0	0	0	0	1	0	1	0	0	1	0	0	0	0	5	10	20	30	20	4	6	6	6	6	6	6	6	1	1	6	6	6	6	6	6	1	1	0	0	0	1
875	2	Some college (no degree)	1	5	0	1	1	1	0	0	0	0	0	1	1	0	0	0	0	1	0	0	6	0	0	20	6.66667	4	5	5	5	5	1	5	5	6	3	6	6	5	5	6	1	0	0	0	0	0	0
528	2	Some college (no degree)	1	3	1	0	0	0	0	0	0	0	1	1	0	1	0	0	0	1	0	0	5	100	20	30	50	4	3	3	3	3	3	3	3	4	4	3	4	4	3	3	3	0	0	1	0	0	0
648	2	Some college (no degree)	1	5	1	0	0	1	0	0	0	0	0	1	0	0	0	0	0	0	0	0	3	0	0	0	0	3	2	5	2	3	2	3	2	2	3	2	2	2	2	2	4	0	0	0	0	1	1
124	2	High school diploma or GED	1	6	1	1	0	1	0	0	0	0	0	1	1	1	0	1	0	1	1	0	9	0	10	20	10	4	3	4	5	6	1	6	4	2	2	5	6	6	2	5	6	0	0	0	0	0	0
830	2	High school diploma or GED	1	6	0	0	0	1	0	0	0	0	0	0	0	1	1	0	0	1	1	0	5	0	0	5	1.66667	4	5	5	6	5	2	5	4	5	5	6	5	5	5	6	6	1	0	1	0	0	0
988	2	Associate's degree	2	5	1	0	0	1	0	1	0	1	1	1	1	1	0	0	0	1	1	1	11	5	10	15	10	2	6	4	5	3	1	6	6	3	3	4	6	6	3	6	6	1	0	1	1	0	0
1009	1	Bachelor's degree	2	5	1	0	0	1	0	1	0	1	1	1	1	1	0	0	0	1	0	0	9	0	0	10	3.33333	4	2	4	4	4	2	3	2	4	2	3	4	4	3	3	1	1	0	1	0	0	0
984	2	Some college (no degree)	1	3	0	0	1	1	0	0	0	1	1	1	1	1	1	0	0	1	1	1	11	5	3	5	4.33333	4	5	2	3	4	1	5	4	4	2	4	5	6	4	5	1	1	1	1	1	1	0
783	1	Some college (no degree)	1	4	0	0	0	1	0	0	0	1	0	1	1	0	0	0	0	1	0	0	5	0	0	0	0	3	3	4	3	4	1	3	5	3	3	3	4	4	3	4	1	1	1	1	0	0	0
600	1	Bachelor's degree	2	4	1	1	0	1	0	1	0	1	1	1	1	0	1	0	0	1	1	1	12	0	0	5	1.66667	5	5	5	4	3	2	5	5	4	3	4	5	5	4	5	4	1	1	1	1	0	0
915	2	Some college (no degree)	1	3	1	1	1	1	0	1	0	1	1	1	1	1	1	1	0	0	0	0	12	35	40	30	35	4	4	2	3	3	3	4	4	4	3	5	5	6	4	4	3	1	1	1	1	0	1
349	1	Graduate degree	2	1	0	0	1	0	0	1	1	0	0	0	0	0	0	1	0	0	0	0	4	52	5	67	41.3333	6	5	6	6	5	6	5	6	6	5	6	6	5	5	6	6	0	0	0	0	0	0
25	1	Graduate degree	2	4	0	0	0	0	0	0	0	0	0	1	1	0	0	0	0	0	0	0	2	30	25	25	26.6667	2	3	6	5	2	1	5	3	4	2	1	6	6	3	6	1	0	0	1	0	0	0
692	1	Some college (no degree)	1	2	1	0	0	1	0	0	0	0	0	1	0	0	0	1	0	0	0	1	5	50	25	10	28.3333	4	4	4	4	4	4	4	5	4	4	5	5	5	4	5	4	1	0	1	0	0	0
2	1	High school diploma or GED	1	1	0	0	1	0	0	1	0	0	0	0	1	0	1	1	0	1	0	0	6	0	0	0	0	6	6	1	1	1	6	6	6	6	6	6	6	6	6	6	6	0	0	0	0	0	0
562	1	Some college (no degree)	1	4	0	0	0	1	0	0	0	1	1	0	0	0	0	0	0	1	1	0	5	0	0	0	0	4	4	5	5	5	2	2	3	2	2	3	3	4	4	4	4	1	0	0	0	0	0
475	1	Some college (no degree)	1	2	0	0	0	1	0	1	1	1	0	0	0	0	0	0	0	0	1	0	5	50	30	60	46.6667	2	2	5	2	3	3	2	3	2	4	3	5	4	2	5	1	1	1	0	0	0	0
1036	1	Some college (no degree)	1	7	1	0	0	1	0	0	1	1	0	1	0	1	0	0	0	1	0	0	7	0	0	0	0	6	6	6	6	6	5	1	6	1	1	1	6	6	1	1	6	0	0	0	0	0	0
122	2	Some college (no degree)	1	4	1	1	0	0	0	1	0	0	1	0	1	1	0	0	0	0	0	0	6	0	0	5	1.66667	6	6	6	6	6	1	6	6	6	6	6	6	6	6	6	6	0	0	0	0	0	0
776	1	Some college (no degree)	1	2	1	0	1	1	0	1	0	0	0	1	0	1	1	1	0	1	0	0	9	0.5	10	25	11.8333	4	5	3	5	5	1	3	3	1	3	4	5	6	3	4	4	1	1	1	0	0	0
731	1	Some college (no degree)	1	6	0	0	0	1	0	0	0	0	0	1	1	0	0	0	0	1	1	0	5	50	60	20	43.3333	4	6	5	5	5	1	5	5	5	5	5	5	6	5	5	6	1	1	0	0	1	0
100	1	Some college (no degree)	1	4	0	0	1	1	0	0	0	1	1	0	1	1	0	0	0	0	1	0	7	5	20	30	18.3333	3	5	6	3	5	4	5	3	5	6	3	4	5	4	5	6	0	0	0	0	0	0
450	1	Some college (no degree)	1	7	0	1	0	1	0	0	0	0	1	0	1	1	0	0	0	1	1	0	7	0	0	0	0	6	6	6	6	6	1	5	5	6	4	6	6	6	6	6	6	1	0	1	0	1	0
91	1	Some college (no degree)	1	3	1	1	0	1	0	1	0	1	0	1	1	1	0	0	0	1	1	0	10	0	5	35	13.3333	5	5	5	5	5	3	5	5	5	5	4	5	5	5	5	5	1	1	1	0	0	0
650	2	Some college (no degree)	1	2	0	1	1	1	0	1	0	0	1	1	1	1	1	0	0	1	1	0	11	2	5	10	5.66667	3	3	3	4	4	1	3	4	4	2	4	4	4	3	4	1	1	1	0	0	0	1
251	2	Some college (no degree)	1	4	0	0	1	1	0	0	1	0	0	0	1	0	0	1	0	1	0	0	6	100	0	0	33.3333	5	6	5	4	4	5	5	4	5	5	2	3	4	3	4	4	1	0	0	0	0	0
406	2	Some college (no degree)	1	4	1	0	1	0	0	0	0	0	1	1	0	0	1	0	0	1	1	0	7	60	60	25	48.3333	5	5	3	4	5	1	5	5	3	4	5	5	5	3	5	5	1	0	0	0	0	0
197	1	Bachelor's degree	2	5	1	0	0	0	0	0	0	0	1	1	1	1	0	1	0	1	1	1	9	0	1	1	0.666667	4	5	5	5	5	3	5	4	6	3	5	5	5	5	5	4	1	0	1	0	0	0
165	2	Less than high school diploma	1	2	0	0	0	1	0	0	1	0	0	0	0	0	0	0	0	0	1	0	3	15	5	0	6.66667	2	4	5	5	4	2	5	5	5	5	5	5	6	5	5	4	0	0	0	0	0	0
822	2	Some college (no degree)	1	4	0	0	0	1	0	1	0	0	1	1	1	1	0	0	0	0	1	0	7	0	5	10	5	4	4	3	3	3	2	5	5	6	3	5	5	5	4	4	4	0	0	0	0	0	0
515	1	Some college (no degree)	1	4	1	0	1	1	0	0	0	1	0	1	1	0	1	1	0	1	1	0	10	0	0	1	0.333333	3	3	1	3	1	1	2	3	2	2	2	3	2	1	3	1	0	0	1	1	0	0
627	2	Some college (no degree)	1	5	0	0	0	1	0	0	0	1	1	1	0	0	0	0	0	1	1	0	6	5	10	10	8.33333	3	2	1	1	3	1	1	3	2	2	2	2	2	2	4	3	0	0	1	0	0	0
764	2	Some college (no degree)	1	4	1	0	1	1	0	1	1	1	0	1	1	1	0	1	0	1	1	0	12	0	0	25	8.33333	3	3	4	3	3	2	3	3	4	3	3	4	4	4	3	4	0	0	1	0	1	0
607	2	Some college (no degree)	1	7	0	0	0	0	0	1	0	0	1	0	0	0	0	0	0	0	1	0	3	0	0	0	0	6	6	3	6	6	6	5	5	4	5	5	5	5	6	3	4	1	0	1	0	0	0
353	1	Associate's degree	2	7	0	0	1	1	0	0	0	1	0	1	1	1	1	0	0	1	1	0	9	0	0	0	0	2	3	3	3	3	1	2	3	2	1	3	2	3	1	1	3	1	1	1	0	0	1
114	2	Some college (no degree)	1	4	1	0	0	1	0	0	1	1	1	1	1	1	1	0	0	1	1	0	11	0	5	5	3.33333	5	5	5	5	5	1	5	5	5	1	1	5	5	1	5	5	1	1	1	1	0	1
816	2	Some college (no degree)	1	1	1	0	0	1	0	0	0	1	1	0	1	1	1	1	0	1	0	0	9	50	75	100	75	5	6	1	1	2	1	5	5	3	2	3	3	4	2	2	1	1	1	1	0	0	0
1007	2	Some college (no degree)	1	4	0	0	0	1	0	0	0	0	0	1	0	0	0	0	1	0	0	1	4	80	0	0	26.6667	4	3	2	4	3	4	4	5	1	3	4	4	1	2	4	5	1	0	0	0	0	0
678	1	Some college (no degree)	1	6	1	1	1	1	0	0	0	1	1	0	1	1	1	0	0	1	1	0	11	5	1	1	2.33333	4	4	4	5	5	1	4	4	5	3	3	4	4	4	5	5	0	1	1	0	0	0
320	2	Some college (no degree)	1	2	1	0	0	1	0	0	1	1	1	0	1	0	0	0	0	0	1	1	8	10	5	20	11.6667	5	5	6	1	2	3	5	1	1	3	2	1	5	1	1	1	0	0	0	0	0	0
323	2	Some college (no degree)	1	3	1	1	1	1	0	1	0	0	0	0	0	0	0	0	0	1	0	0	6	50	30	20	33.3333	1	2	5	4	6	6	4	5	3	3	1	1	1	5	5	2	0	0	0	0	0	0
182	1	Some college (no degree)	1	5	1	0	0	1	0	1	0	0	0	0	1	1	1	0	0	1	1	0	8	2	10	10	7.33333	2	3	3	5	5	1	5	5	3	2	2	3	4	3	3	1	1	1	1	1	0	1
374	2	Some college (no degree)	1	2	0	0	0	1	0	0	0	1	1	1	1	1	1	0	0	1	1	0	9	5	15	15	11.6667	5	5	2	3	4	1	3	5	3	1	5	6	6	2	4	1	1	0	0	0	0	0
84	2	Bachelor's degree	2	4	1	0	0	0	0	1	0	0	1	0	1	1	1	1	0	1	1	0	9	0	0	0	0	6	6	6	4	5	1	6	6	4	2	5	6	6	6	6	6	1	0	1	0	0	0
995	2	Some college (no degree)	1	4	0	0	1	1	0	0	0	1	0	1	0	0	0	0	0	1	0	0	5	5	10	1	5.33333	3	3	3	3	3	3	3	3	3	3	3	3	3	3	3	3	1	1	0	0	0	0
193	2	Some college (no degree)	1	3	1	0	1	1	0	1	0	0	1	0	0	1	1	0	0	1	1	1	10	1	0	10	3.66667	5	4	1	4	1	1	5	4	4	1	4	5	5	3	4	1	1	0	0	1	1	0
658	1	Some college (no degree)	1	6	0	0	1	1	0	0	0	0	0	1	1	1	0	1	0	1	0	0	7	2	15	50	22.3333	3	5	2	3	1	1	1	1	1	1	1	1	3	1	3	1	0	0	1	0	0	0
362	2	Graduate degree	2	2	1	0	0	1	0	0	0	1	1	0	0	1	0	0	0	1	1	0	7	50	15	25	30	4	4	3	3	4	1	4	4	3	3	3	3	5	4	3	6	1	0	0	1	0	0
655	1	Less than high school diploma	1	4	0	0	0	1	0	0	0	0	1	0	0	0	1	0	1	1	0	0	5	30	20	80	43.3333	5	5	4	4	5	5	5	4	5	5	5	5	5	5	5	5	1	0	0	0	0	1
717	1	Some college (no degree)	1	4	1	1	0	1	0	0	0	1	0	1	0	0	0	0	0	0	0	0	5	50	70	5	41.6667	2	5	4	4	3	1	1	3	3	3	2	2	6	1	4	1	1	1	0	0	0	0
907	1	High school diploma or GED	1	4	0	1	1	1	0	0	0	1	1	1	0	1	0	1	0	1	0	0	9	10	20	10	13.3333	3	3	5	5	5	2	5	4	4	4	4	4	4	4	6	2	1	1	0	0	0	0
55	1	Some college (no degree)	1	2	0	0	0	0	0	0	0	0	0	0	0	0	0	0	0	1	1	1	3	100	80	1	60.3333	6	6	6	6	6	4	6	6	6	6	6	6	6	6	6	6	0	0	0	0	0	0
964	2	Some college (no degree)	1	3	0	0	0	1	0	1	1	0	0	1	0	0	0	0	0	1	1	0	6	7	0	10	5.66667	2	2	1	1	3	1	5	5	4	4	3	5	6	4	6	5	1	0	0	0	0	0
962	2	High school diploma or GED	1	1	1	0	0	1	0	0	0	0	1	1	1	1	1	1	0	1	1	0	10	25	33	5	21	3	5	5	3	2	2	4	2	2	2	1	2	5	3	3	2	0	0	0	0	0	0
936	2	Some college (no degree)	1	4	0	0	0	1	0	0	0	0	1	1	0	0	0	0	0	1	1	0	5	50	50	50	50	3	3	2	3	3	4	3	3	4	3	2	3	3	2	3	2	0	0	0	0	0	0
399	2		1.5	7	0	1	0	0	1	0	0	0	0	0	0	0	0	0	0	1	0	0	3	10	10	10	10	1	1	1	1	1	1	1	1	1	1	1	1	1	1	1	1	0	0	1	0	0	0
502	1	Some college (no degree)	1	7	1	1	0	1	0	0	0	1	0	1	1	1	0	1	0	0	1	0	9	10	0	0	3.33333	3	3	3	3	3	1	3	3	3	3	3	3	3	3	3	3	0	0	0	0	0	0
523	2	Bachelor's degree	2	7	1	0	1	1	0	1	0	1	1	0	1	1	1	1	0	0	1	1	12	5	5	5	5	2	3	2	3	4	1	5	5	5	5	5	5	4	4	5	5	1	0	1	1	1	0
1024	2	Associate's degree	2	4	0	0	1	0	0	0	0	0	0	1	0	0	1	0	0	0	0	1	4	60	20	40	40	4	2	5	4	4	4	2	1	2	3	4	6	5	3	3	4	0	0	0	0	0	0
40	1	Associate's degree	2	3	0	1	0	1	0	0	1	1	0	0	0	0	0	0	0	0	0	0	4	1	1	1	1	3	2	2	3	2	4	4	5	4	3	3	3	4	3	2	3	0	0	0	0	0	0
687	2	Bachelor's degree	2	3	1	0	1	1	0	1	0	0	1	1	1	1	1	1	0	1	1	1	13	3	3	3	3	2	4	2	3	4	3	4	3	4	3	4	3	4	3	4	3	1	0	1	1	0	0
775	2	Associate's degree	2	2	0	0	0	0	0	1	0	0	0	0	0	0	1	0	0	0	0	0	2	20	50	100	56.6667	2	4	4	4	3	3	2	2	1	5	5	3	5	5	1	4	1	0	0	0	0	0
373	2	Less than high school diploma	1	7	1	0	0	1	0	1	1	1	0	1	0	0	0	0	0	1	0	0	7	5	5	5	5	5	6	6	6	6	2	5	6	5	4	3	5	5	5	4	6	1	0	1	0	0	0
538	1	Less than high school diploma	1	7	1	0	0	1	0	1	0	1	0	1	0	1	0	0	0	0	0	0	6	5	5	10	6.66667	5	5	5	5	6	3	6	4	3	3	2	3	4	4	3	4	1	0	0	0	0	0
1010	1	Associate's degree	2	4	1	0	0	0	0	0	1	0	0	0	1	0	1	0	0	0	0	0	4	100	100	100	100	3	4	3	3	5	5	4	4	3	3	5	5	4	4	5	4	0	0	0	0	0	0
1041	1	Associate's degree	2	3	1	0	0	1	0	0	0	0	0	0	0	0	0	0	0	1	1	0	4	45	55	90	63.3333	4	3	2	6	4	4	4	6	4	3	2	2	3.5	3.5	3.5	3.5	0	0	0	0	0	0
858	2	Less than high school diploma	1	6	0	0	0	1	0	0	0	0	0	0	0	0	0	0	1	0	0	1	3	20	10	30	20	3	3	1	2	1	2	3	5	5	5	1	4	6	5	5	6	0	0	0	0	0	0
897	2	Associate's degree	2	1	1	0	0	0	0	0	0	0	0	0	1	1	0	1	0	0	0	0	4	40	60	50	50	6	5	4	5	6	6	5	4	3	4	4	5	4	3	4	5	0	0	0	0	0	0
243	1	High school diploma or GED	1	4	0	0	0	1	0	0	0	0	1	0	1	1	0	0	0	0	0	1	5	1	1	1	1	4	4	4	4	4	4	4	4	4	4	4	4	4	4	4	4	1	0	0	0	0	0
1040	1	Associate's degree	2	4	0	1	0	0	0	0	0	1	1	0	1	0	0	0	1	0	0	0	5	0	0	0	0	1	1	1	1	1	1	1	1	1	1	1	1	1	1	1	1	0	0	0	0	0	0
911	1	Associate's degree	2	5	1	0	0	1	0	0	0	0	1	0	0	0	0	0	0	0	0	1	4	80	20	70	56.6667	3	2	3	2	3	5	4	4	3	2	3	3	2	3	3	4	1	0	0	0	0	0
876	1	Associate's degree	2	4	0	0	0	0	1	0	0	0	1	0	0	0	1	1	0	0	0	1	5	34	35	4	24.3333	5	3	1	3	4	4	4	3	4	4	3	3	5	3	3	2	0	0	0	0	0	0
85	1	Some college (no degree)	1	5	1	1	1	1	0	1	1	0	0	0	1	1	0	0	0	1	1	0	10	10	10	30	16.6667	4	4	3	3	3	2	4	3	4	3	3	4	4	3	4	3	1	0	0	0	0	0
393	2	Associate's degree	2	7	0	0	0	1	0	0	1	0	0	0	0	0	0	0	1	0	0	1	4	100	50	59	69.6667	1	1	1	1	1	1	1	1	1	1	1	1	1	1	1	1	0	0	1	0	0	0
210	1	Associate's degree	2	1	0	1	0	1	0	0	0	1	0	1	1	0	0	0	0	0	0	0	5	5	4	45	18	2	5	3	5	3	3	3	4	3	2	3	3	4	3	3	3	1	0	0	0	0	0
41	2	Associate's degree	2	4	1	0	0	1	0	0	0	1	1	1	0	0	0	0	0	0	0	0	5	0	0	0	0	3	6	6	3	3	4	4	3	5	5	4	5	5	4	5	4	0	0	0	0	0	0
194	1	Some college (no degree)	1	6	0	0	0	0	0	0	0	0	0	0	1	0	0	1	0	0	1	0	3	1	1	0	0.666667	2	2	4	2	2	2	2	2	2	2	2	2	2	2	2	1	1	0	1	1	0	0
569	2	Associate's degree	2	4	0	0	0	1	1	0	0	0	1	0	1	0	0	0	1	0	0	0	5	45	25	2	24	5	5	5	4	5	5	5	5	5	5	5	5	4	5	5	5	0	0	1	0	0	0
328	2	Associate's degree	2	3	0	0	1	0	0	0	0	0	0	0	0	0	0	0	0	0	0	0	1	50	20	50	40	4	3	4	3	5	4	4	4	3	3	5	3	3	3	4	4	0	0	1	0	0	0
224	1	Associate's degree	2	7	1	0	0	1	0	1	0	1	0	1	1	1	0	0	0	1	1	0	9	0	0	20	6.66667	1	4	4	4	1	1	1	5	1	4	1	5	6	1	5	5	0	0	0	0	0	0
216	1	Associate's degree	2	1	1	1	0	0	0	0	0	0	0	1	1	0	0	1	0	0	0	0	5	1	2	1	1.33333	6	5	3	5	6	5	5	5	6	4	4	5	5	6	6	5	0	0	0	0	0	0
112	2	Associate's degree	2	3	0	1	0	1	0	0	0	0	0	0	0	0	0	0	0	0	1	0	3	65	55	50	56.6667	6	5	4	4	5	6	6	5	4	4	5	6	6	5	4	4	1	0	1	0	0	0
1012	1	Associate's degree	2	4	1	0	0	1	0	1	0	0	0	1	0	1	0	1	0	0	0	0	6	10	10	100	40	4	4	4	4	4	4	4	4	4	4	4	4	4	4	4	4	0	0	0	0	0	0
990	2	Associate's degree	2	4	1	0	0	0	0	0	0	0	0	0	0	1	0	0	0	0	0	0	2	30	30	50	36.6667	5	5	6	6	6	6	5	6	5	3	6	5	6	5	6	6	0	0	0	0	0	0
471	1	Associate's degree	2	2	0	0	0	1	0	0	0	0	1	0	0	0	0	0	0	0	0	0	2	10	5	0	5	3	4	2	4	2	4	3	4	2	4	2	4	6	2	3	5	1	1	0	0	0	0
308	2	Associate's degree	2	5	1	0	0	1	0	0	0	1	0	0	0	1	0	0	0	0	1	0	5	0	0	50	16.6667	5	5	3	5	4	5	5	4	4	6	5	5	4	4	4	5	1	1	1	0	0	0
201	1	Associate's degree	2	4	0	1	0	1	0	0	0	0	0	1	0	0	0	0	0	0	0	0	3	5	8	15	9.33333	2	4	3	4	5	2	4	3	3	4	3	4	5	5	5	3	1	0	1	1	0	0
438	2	Bachelor's degree	2	1	1	1	1	1	0	0	0	0	0	1	1	1	0	0	0	0	0	0	7	10	10	10	10	3	3	3	3	4	4	4	4	4	4	4	4	4	4	4	2	1	0	0	0	0	0
238	1	Graduate degree	2	1	1	0	0	0	0	0	0	0	0	0	1	0	0	0	0	1	0	0	3	5	45	55	35	6	6	6	6	6	6	6	6	6	6	6	6	6	6	6	6	0	0	0	0	0	0
946	2	Graduate degree	2	7	1	0	1	1	0	0	0	1	1	1	1	1	1	1	0	1	1	1	13	15	15	100	43.3333	1	4	1	5	3	1	6	6	1	3	1	6	6	2	4	1	1	1	1	1	1	1
688	1	Graduate degree	2	4	1	0	0	1	0	0	0	1	0	0	1	0	0	0	0	1	1	0	6	15	15	5	11.6667	3	4	2	3	5	1	5	4	3	2	3	4	3	3	4	3	1	0	1	0	0	0
64	2	High school diploma or GED	1	3	0	0	0	1	0	1	0	1	0	1	0	0	1	0	0	0	0	0	5	0	7	2	3	6	5	4	5	4	4	4	4	4	4	4	5	5	5	4	4	0	1	0	0	0	0
691	1	Some college (no degree)	1	6	1	0	0	0	0	1	0	1	1	0	1	1	0	0	0	1	0	0	7	20	15	40	25	3	5	2	6	5	2	5	1	2	5	6	6	3	1	4	5	1	0	1	0	0	0
643	1	Associate's degree	2	4	1	0	1	1	0	0	1	1	1	0	1	1	0	0	0	1	0	1	10	5	5	20	10	2	2	3	3	3	1	2	3	4	4	1	3	3	3	3	1	1	0	0	0	0	1
274	1	Associate's degree	2	4	1	0	1	1	0	0	0	1	0	1	0	0	1	0	0	1	1	0	8	0	0	0	0	2	4	6	6	5	3	2	6	4	3	4	5	6	5	2	3	1	0	1	0	0	0
178	2	Associate's degree	2	4	1	0	0	1	0	0	0	0	1	0	0	0	1	0	0	1	0	0	5	5	5	15	8.33333	4	5	3	4	4	2	4	6	2	4	3	6	6	4	3	3	0	0	0	1	0	1
697	2	Associate's degree	2	3	1	0	0	1	0	1	0	1	1	0	1	1	1	0	0	1	1	0	10	0	2	5	2.33333	6	6	6	6	6	2	6	6	6	6	6	6	6	6	6	6	1	0	0	0	0	0
722	2	Bachelor's degree	2	1	1	0	0	1	0	1	0	1	1	1	1	1	0	0	0	1	1	1	11	0	0	25	8.33333	5	4	2	2	2	2	2	5	2	1	1	5	5	1	1	1	1	1	1	1	0	0
753	2	Less than high school diploma	1	5	0	0	1	0	0	0	0	0	0	1	0	0	0	0	0	0	0	1	3	50	25	60	45	5	5	5	5	5	2	5	5	2	2	2	2	2	2	2	6	0	1	1	0	0	0
394	1	Associate's degree	2	7	1	0	0	0	0	0	0	0	1	0	0	0	0	0	0	0	0	0	2	0	0	0	0	5	5	5	1	1	1	5	1	1	1	5	5	5	5	5	6	1	0	0	0	0	0
885	2	Associate's degree	2	6	1	0	0	1	0	0	0	0	0	1	0	1	0	0	0	1	1	0	6	90	0	5	31.6667	5	6	4	3	1	1	4	4	6	5	6	5	6	3	5	4	1	0	0	0	0	0
629	1	Associate's degree	2	7	1	1	0	1	0	1	0	1	0	1	0	1	1	0	0	1	1	0	10	0	0	5	1.66667	3	3	4	4	4	1	4	4	4	4	4	4	4	4	4	6	1	0	1	0	0	0
782	1	High school diploma or GED	1	3	1	0	0	0	0	0	1	0	0	0	0	0	0	0	0	0	1	1	4	45	32	1	26	3	4	4	4	2	4	4	4	4	5	4	5	4	4	5	4	0	0	0	0	0	0
144	2	Associate's degree	2	4	0	0	0	1	0	0	0	1	1	1	0	0	1	0	0	1	1	0	7	0	0	0	0	3	1	4	6	6	1	1	1	6	1	1	6	6	2	6	1	1	1	1	0	0	0
415	2	Associate's degree	2	4	0	0	0	1	0	0	0	1	1	1	0	1	0	0	0	1	1	0	7	0	0	10	3.33333	4	5	4	4	5	1	3	4	4	2	4	4	4	4	4	4	1	0	0	0	0	0
950	2	Associate's degree	2	4	0	1	0	1	0	1	0	0	0	0	0	0	0	0	0	1	0	0	4	10	10	35	18.3333	2	4	3	4	6	5	6	4	4	1	1	3	4	4	6	4	0	0	0	0	0	0
428	1	High school diploma or GED	1	3	1	0	0	1	0	1	1	0	0	1	0	1	1	0	0	0	0	0	7	0	0	0	0	3	5	4	5	5	1	3	5	4	4	5	5	6	6	6	6	1	0	1	0	0	0
694	1	Associate's degree	2	2	1	0	1	1	1	1	0	0	1	1	1	1	0	1	0	1	1	0	12	0	0	0	0	5	4	5	2	5	2	4	2	1	5	2	2	5	2	2	5	1	0	0	0	0	0
410	1	Associate's degree	2	6	0	0	0	1	0	0	0	1	0	1	0	1	0	0	1	0	1	0	6	1	0	1	0.666667	5	5	4	5	4	2	5	4	4	3	5	6	6	4	5	6	1	0	1	0	0	0
863	2	Associate's degree	2	6	1	0	0	0	0	0	0	0	1	0	1	0	0	1	0	0	1	0	5	50	30	45	41.6667	4	2	2	3	4	4	4	5	5	5	5	5	4	4	4	3	0	0	1	0	0	0
800	1	High school diploma or GED	1	3	1	0	0	0	0	0	1	0	1	1	0	0	0	0	0	1	1	0	6	1	10	25	12	4	4	5	2	3	1	4	4	2	3	2	4	2	2	4	3	1	0	0	0	0	0
22	2	Associate's degree	2	3	1	1	0	1	0	0	0	0	0	1	1	1	1	0	0	1	0	0	8	5	5	15	8.33333	4	5	2	5	5	2	4	5	2	5	6	6	5	2	6	3	1	1	1	1	0	1
269	2	Associate's degree	2	1	1	0	0	1	0	0	0	0	1	1	1	0	0	1	0	1	1	0	8	1	0	5	2	5	5	4	4	4	2	5	5	5	4	5	5	5	6	5	3	0	0	1	0	0	1
443	1	Bachelor's degree	2	4	0	0	1	1	0	0	0	1	1	1	1	1	1	0	0	0	1	0	9	5	5	1	3.66667	6	6	4	4	5	3	5	5	3	5	6	6	6	3	5	3	1	0	0	0	0	0
222	1	Graduate degree	2	7	1	0	0	0	0	0	0	0	0	0	0	0	0	0	0	0	0	0	1	1	10	10	7	6	6	6	5	6	6	5	6	5	5	6	5	6	5	6	5	0	0	0	0	0	0
837	2	Graduate degree	2	4	0	0	0	0	0	0	0	0	1	1	1	1	0	0	0	1	1	0	6	78	60	56	64.6667	5	6	5	5	6	6	5	5	6	6	6	6	5	5	5	3.5	0	0	0	0	0	0
467	1	Graduate degree	2	6	1	0	0	1	0	0	0	0	1	0	0	1	0	0	0	1	1	0	6	20	20	25	21.6667	4	4	4	4	5	5	6	5	4	4	5	4	4	6	5	4	0	0	0	0	0	0
170	1	Less than high school diploma	1	4	1	0	0	0	0	0	0	0	1	0	0	0	0	1	0	1	1	0	5	76	48	86	70	5	3	4	1	3	6	4	4	2	4	5	4	5	4	3	5	0	0	0	0	0	0
880	2	Associate's degree	2	6	0	0	1	0	1	0	0	0	0	0	0	1	0	0	0	1	0	0	4	60	65	50	58.3333	4	4	3	3	4	4	4	4	4	2	3	4	3	4	4	4	1	0	0	0	1	0
299	1	Associate's degree	2	4	0	0	0	1	0	0	0	1	1	0	0	1	0	1	0	1	0	1	7	0	0	10	3.33333	4	5	5	5	5	2	4	4	4	4	5	5	5	5	6	3	0	1	0	0	0	0
747	1	Less than high school diploma	1	1	1	0	1	1	0	0	0	1	1	1	1	1	0	0	0	1	1	1	11	0	0	0	0	6	6	4	1	5	1	5	5	1	1	1	4	6	1	1	1	0	0	1	0	0	0
820	1	High school diploma or GED	1	6	0	0	0	1	0	1	0	0	0	1	0	1	0	1	0	0	1	0	6	2	5	8	5	2	4	5	4	5	4	3	4	5	2	2	3	5	4	4	5	1	0	1	0	0	0
336	1	Associate's degree	2	4	1	0	0	1	0	0	0	1	1	0	1	1	0	0	0	0	1	0	7	10	35	50	31.6667	3	3	2	3	3	1	3	4	2	3	5	5	5	2	4	3	0	0	1	1	1	1
344	2	Bachelor's degree	2	6	1	0	1	0	0	0	0	0	1	0	0	0	0	1	1	0	0	0	5	50	20	25	31.6667	4	5	6	4	5	6	4	5	6	4	5	6	4	5	6	5	0	0	0	0	0	0
260	2	Bachelor's degree	2	6	1	1	0	1	0	1	0	0	0	1	1	1	1	0	0	1	1	0	10	5	25	10	13.3333	3	4	4	3	3	2	3	3	4	2	4	4	4	3	3	5	1	0	1	0	1	0
901	1	Graduate degree	2	3	0	0	0	1	0	1	0	0	0	0	0	0	1	0	0	1	1	0	5	5	2	5	4	6	5	5	3	2	3	4	4	4	5	4	4	6	6	5	4	1	1	1	1	0	0
716	1	Less than high school diploma	1	5	1	0	0	1	0	0	0	0	1	0	0	1	0	0	0	1	0	0	5	48	60	15	41	2	4	4	3	4	2	4	5	4	4	3	5	5	4	4	5	0	1	0	0	0	0
103	1	Associate's degree	2	4	0	1	0	1	0	0	0	1	0	0	1	1	0	0	0	0	0	1	6	5	5	30	13.3333	4	4	4	4	4	4	4	4	4	3	2	4	4	2	1	2	0	0	1	0	1	0
646	1	Associate's degree	2	4	0	0	1	1	0	0	0	1	0	0	0	0	0	0	0	1	1	0	5	0	0	0	0	4	4	3	2	2	2	4	4	4	4	2	3	4	3	3	3	1	0	0	0	0	1
445	2	Some college (no degree)	1	4	0	0	0	1	0	0	0	0	0	0	0	1	0	0	0	0	1	0	3	70	40	100	70	4	2	4	6	3	3	6	2	1	5	2	3	6	4	6	6	0	0	0	0	0	0
459	1	Some college (no degree)	1	1	1	0	0	1	0	1	0	1	1	1	1	1	0	1	0	1	1	1	12	0	0	5	1.66667	2	2	2	2	2	1	1	1	1	1	1	1	1	1	1	1	1	1	1	1	0	0
740	2	Associate's degree	2	4	1	0	0	0	0	0	0	0	0	1	1	0	0	1	0	0	1	0	5	5	10	70	28.3333	5	5	5	6	6	2	5	5	5	6	6	5	6	3	5	3	0	0	0	0	0	0
684	1	Associate's degree	2	4	0	0	0	1	0	0	0	0	0	0	1	0	1	0	1	1	0	0	5	30	40	50	40	4	5	5	3	1	4	5	3	3	4	1	4	4	4	3	1	1	0	1	0	0	0
870	2	High school diploma or GED	1	4	0	1	0	1	0	1	0	1	0	1	1	1	0	0	0	0	0	0	7	40	35	33	36	5	4	5	5	3	3	2	4	4	3	4	5	3	3	4	2	0	0	1	0	0	0
419	2	Associate's degree	2	3	0	0	0	1	0	1	0	0	0	1	1	0	0	0	0	0	0	0	4	5	1	3	3	5	4	3	5	4	2	5	4	5	4	5	6	5	4	5	4	1	0	0	0	0	0
744	1	High school diploma or GED	1	4	0	0	0	0	0	0	0	0	0	1	0	0	0	0	1	0	0	0	2	20	40	50	36.6667	3	3	4	2	4	5	4	3	4	3	4	4	3	4	3	2	1	0	0	0	1	0
621	2	Associate's degree	2	5	1	1	0	1	0	1	0	0	1	1	1	1	1	1	0	1	1	1	13	60	10	20	30	3	4	5	6	6	1	3	6	6	4	6	6	6	5	6	6	1	0	1	0	0	0
89	1	High school diploma or GED	1	4	1	0	1	1	1	1	0	0	1	1	1	1	1	0	0	1	1	1	13	0	0	0	0	5	5	5	6	6	6	6	6	6	6	6	6	6	6	6	6	0	0	0	0	0	0
253	1	Associate's degree	2	4	1	0	1	1	0	0	0	0	0	1	0	0	1	0	1	0	0	0	6	50	60	80	63.3333	6	6	5	3	3	1	2	1	1	1	1	1	3	3	1	2	0	0	0	0	0	0
157	2	Some college (no degree)	1	7	0	0	1	0	0	0	0	1	0	1	1	0	0	1	0	0	0	0	5	75	55	55	61.6667	6	6	6	6	6	6	6	6	6	6	6	6	6	6	6	6	0	0	0	0	0	0
584	1	Bachelor's degree	2	7	0	0	0	1	1	0	1	1	1	1	0	0	1	0	1	0	0	0	8	100	100	100	100	1	3	1	1	1	1	1	1	1	1	1	1	1	1	1	1	0	0	0	0	0	0
88	2	Bachelor's degree	2	4	0	0	0	0	0	0	0	0	0	0	0	0	0	0	0	0	0	0	0	2	3	3	2.66667	5	5	5	5	5	5	5	5	5	5	5	6	5	5	5	5	0	0	0	0	0	0
39	2	Bachelor's degree	2	1	0	0	0	0	0	0	0	0	1	0	1	0	0	0	0	0	0	0	2	1	1	1	1	6	3.5	6	6	5	5	6	6	6	5	6	6	6	5	5	5	0	0	0	0	0	0
940	2	Some college (no degree)	1	4	1	0	0	1	0	0	0	0	0	0	0	0	0	1	0	0	0	0	3	50	50	50	50	3	3	4	4	2	2	1	1	2	2	3	3	4	4	5	5	0	0	0	0	0	0
1015	1	Bachelor's degree	2	4	0	0	0	0	0	0	1	0	0	0	0	0	0	0	1	1	0	0	3	100	100	100	100	6	5	6	6	6	6	6	6	6	5	6	6	6	6	6	6	0	0	0	0	0	0
361	1	Bachelor's degree	2	1	1	0	0	0	0	0	0	0	1	0	0	0	0	0	0	1	0	1	4	50	80	5	45	6	6	6	6	6	5	6	5	6	6	5	6	6	5	5	6	0	0	0	0	0	0
380	2	High school diploma or GED	1	4	1	0	0	1	0	0	0	1	0	1	1	0	0	1	0	0	0	1	7	5	8	50	21	2	4	2	1	2	1	2	2	2	2	2	2	2	2	2	1	1	0	1	0	0	0
505	2	High school diploma or GED	1	4	0	0	0	1	0	0	1	0	1	1	1	1	0	0	0	0	1	0	7	0	0	0	0	3	4	2	2	3	1	3	3	2	4	5	5	5	2	5	4	1	0	0	0	0	0
368	2	Bachelor's degree	2	4	1	0	0	1	0	0	0	1	0	0	0	0	0	1	0	0	1	1	6	40	20	30	30	5	6	5	5	5	6	5	5	5	5	6	6	6	5	5	5	0	0	1	0	0	0
7	2	Some college (no degree)	1	4	0	0	0	1	0	0	0	1	0	1	1	0	0	0	0	1	0	1	6	0	0	0	0	5	6	6	5	5	5	5	5	6	6	6	5	6	5	6	5	1	0	0	0	0	0
494	2	Bachelor's degree	2	4	0	0	0	0	1	0	1	0	0	0	1	0	0	0	0	0	0	0	3	30	50	30	36.6667	3	3	3	4	3	3	4	5	5	4	3	5	5	5	5	5	0	0	0	0	0	0
865	1	Bachelor's degree	2	4	0	0	0	0	0	0	0	0	1	0	1	0	0	0	0	0	0	0	2	70	60	20	50	4	5	4	5	5	4	6	6	5	4	5	5	6	5	5	5	0	0	1	0	0	0
757	1	Associate's degree	2	5	1	1	1	1	0	0	0	1	1	1	1	1	0	0	0	0	1	0	10	10	10	10	10	5	4	6	6	6	4	6	6	6	6	5	6	6	6	6	6	0	0	0	0	0	0
145	1	Bachelor's degree	2	2	1	0	0	1	0	1	0	1	1	1	1	1	0	1	0	1	1	1	12	0	0	15	5	5	5	2	2	2	2	4	5	4	2	3	5	5	3	3	1	1	1	1	0	0	0
101	2	Bachelor's degree	2	5	0	0	0	0	0	0	0	1	0	0	0	0	0	0	0	1	0	0	2	20	15	10	15	5	4	4	4	5	5	3	5	4	4	4	5	4	3	5	6	0	0	1	0	0	0
869	2	Graduate degree	2	1	1	0	0	0	0	0	0	0	1	1	1	0	0	0	0	1	0	1	6	88	33	22	47.6667	6	6	6	6	5	5	5	4	4	3	3	2	4	4	5	6	1	0	1	0	0	0
750	1	Graduate degree	2	4	0	0	0	0	0	0	1	0	1	0	0	0	0	0	0	0	0	0	2	20	10	30	20	5	4	5	5	6	5	6	6	6	5	6	5	6	6	6	6	1	0	0	0	0	0
797	2	Graduate degree	2	6	1	0	0	1	0	0	0	0	1	0	1	0	0	0	0	0	1	0	5	5	7	10	7.33333	3	4	4	5	3	1	2	4	1	2	4	4	5	1	5	3	1	0	1	0	0	0
384	1	Bachelor's degree	2	7	1	1	1	1	0	0	0	0	0	1	0	0	0	0	0	0	0	0	5	40	30	30	33.3333	6	6	5	6	6	5	6	6	5	5	6	5	3	5	5	6	0	0	1	0	0	0
398	2	Bachelor's degree	2	2	1	0	1	1	0	1	0	0	0	1	1	1	0	0	0	1	0	0	8	40	10	5	18.3333	6	5	5	6	5	6	6	4	5	6	6	6	6	6	5	6	0	0	0	0	0	0
10	2	High school diploma or GED	1	2	0	0	0	0	0	1	0	0	0	0	1	0	0	0	0	0	0	0	2	10	15	20	15	4	3	2	4	5	3	5	3	5	3	1	4	5	3	4	5	1	0	1	0	0	0
709	1	Bachelor's degree	2	4	0	0	0	1	0	0	0	1	0	0	1	0	1	0	0	0	0	0	4	30	25	30	28.3333	5	4	3	4	5	4	4	5	4	3	4	5	4	3	5	5	1	0	1	0	0	0
161	2	Bachelor's degree	2	7	1	0	0	0	1	0	0	1	0	0	0	0	0	0	0	1	0	0	4	20	0	50	23.3333	6	6	6	6	6	6	6	6	6	6	6	6	6	6	6	6	0	0	0	0	0	0
910	1	Bachelor's degree	2	1	1	0	0	0	0	0	0	0	0	0	0	0	0	0	0	1	0	0	2	50	40	20	36.6667	2	2	2	3	4	3	3	4	3	4	4	4	4	3	4	3	0	0	1	0	0	0
444	1	High school diploma or GED	1	5	1	1	0	0	0	0	0	0	1	0	0	1	0	1	0	0	1	0	6	0	0	0	0	5	5	4	4	5	4	2	5	5	2	4	5	5	4	5	4	1	0	1	0	0	0
620	2	Some college (no degree)	1	4	1	1	1	1	0	0	0	0	1	0	1	0	1	0	0	0	0	0	7	20	10	20	16.6667	5	5	4	4	4	3	4	4	4	5	5	5	6	5	3	4	0	0	0	1	0	0
579	2	Some college (no degree)	1	2	1	0	0	1	0	0	0	0	1	0	0	0	0	0	0	1	0	0	4	80	80	90	83.3333	4	4	4	5	5	5	5	5	4	5	5	5	5	5	5	4	0	0	1	0	0	0
50	2	Associate's degree	2	6	1	1	1	1	0	0	0	0	0	0	0	0	0	0	0	0	0	1	5	20	10	60	30	4	4	4	3	4	4	4	6	6	6	5	4	3	3	2	2	1	0	0	0	0	0
291	1	Associate's degree	2	4	0	1	0	1	0	0	0	1	0	1	1	0	1	0	0	1	0	0	7	5	12	5	7.33333	3	4	4	5	4	3	3	3	4	4	4	4	3	3	4	1	0	0	0	0	0	0
672	2	Associate's degree	2	3	0	1	1	1	0	0	1	0	1	0	1	0	0	0	0	1	0	0	7	1	2	30	11	5	5	5	6	4	3	5	5	4	2	4	6	6	4	5	6	0	0	0	0	1	0
576	1	Bachelor's degree	2	5	0	1	0	0	0	1	1	0	0	0	0	0	0	1	0	0	0	0	4	2	1	0	1	5	5	5	5	5	5	5	5	4	3	6	5	5	5	5	5	0	0	0	0	0	0
941	1	Bachelor's degree	2	6	0	0	0	0	0	0	0	0	0	0	0	0	0	0	1	0	0	0	1	50	20	1	23.6667	5	5	6	5	6	6	6	5	5	6	5	5	6	6	5	5	0	0	1	0	0	0
133	1	Bachelor's degree	2	1	1	0	0	0	0	1	0	0	0	0	0	0	0	0	0	0	0	0	2	3	2	3	2.66667	5	6	5	6	5	6	5	4	6	6	5	4	3	2	1	6	0	0	0	0	0	0
130	1	Bachelor's degree	2	1	1	0	1	1	0	1	0	0	0	1	1	1	1	1	0	1	1	0	11	0	0	0	0	5	5	3	2	3	2	5	5	4	4	5	5	5	5	5	1	1	1	1	0	0	0
247	2	Graduate degree	2	2	0	0	0	0	0	0	0	0	0	0	1	0	0	0	1	1	0	0	3	50	50	50	50	6	5	5	6	6	6	6	5	4	4	3	3	4	5	6	5	0	0	1	0	0	0
255	1	Graduate degree	2	7	1	1	0	1	0	1	1	0	0	1	0	1	0	0	0	0	0	0	7	10	5	5	6.66667	5	6	5	5	6	6	5	6	4	5	4	5	6	6	5	6	0	0	1	0	0	0
953	2	High school diploma or GED	1	1	1	0	0	0	1	0	0	0	0	0	1	0	0	0	0	0	0	0	3	100	100	100	100	5	5	4	6	5	5	4	4	6	5	5	5	6	5	6	5	0	0	0	0	0	0
827	2	High school diploma or GED	1	2	1	0	0	0	0	0	0	0	0	0	0	1	0	0	0	0	0	0	2	10	10	10	10	6	6	6	6	6	6	6	6	6	6	6	6	6	6	6	6	1	0	1	0	0	0
24	2	High school diploma or GED	1	4	0	0	0	1	0	0	0	0	0	0	1	1	1	0	0	1	1	1	7	0	10	5	5	5	5	5	5	5	2	5	5	4	3	5	5	5	5	5	5	1	0	1	1	1	0
653	2	Some college (no degree)	1	5	0	0	0	1	0	0	0	1	1	1	1	0	0	0	0	0	1	0	6	1	0	5	2	2	3	5	2	2	5	2	4	3	3	4	3	5	4	4	2	0	0	0	0	0	1
679	2	Bachelor's degree	2	4	0	0	1	1	0	0	0	0	1	1	0	0	1	0	0	0	1	0	6	0	0	5	1.66667	6	5	5	6	4	1	5	3	6	3	5	6	5	6	6	3	1	0	0	0	0	0
227	1	Bachelor's degree	2	7	0	1	0	1	0	0	0	0	0	0	0	0	0	1	0	0	0	0	3	25	30	60	38.3333	6	6	5	5	4	2	2	1	1	1	2	3	3	3	3	2	0	0	0	0	0	0
151	2	Bachelor's degree	2	3	0	1	0	1	0	0	0	1	1	1	0	1	0	0	0	1	0	0	7	5	5	5	5	4	4	4	4	4	2	3	4	4	3	4	5	5	4	5	3	1	0	0	0	0	1
971	2	Bachelor's degree	2	4	1	0	0	1	0	0	0	0	0	1	1	0	0	0	0	1	0	0	5	1	1	5	2.33333	3	6	4	3	3	1	5	1	5	1	3	4	6	3	4	1	0	0	0	0	0	0
1023	2	Bachelor's degree	2	4	0	0	0	1	0	0	1	0	0	1	0	1	0	0	0	1	1	0	6	10	5	4	6.33333	4	4	4	4	4	4	4	4	4	4	4	4	4	4	4	4	0	0	0	0	0	0
234	1	Some college (no degree)	1	5	0	0	0	1	0	1	0	0	1	1	0	1	0	0	0	0	1	1	7	1	1	10	4	6	6	3	6	5	1	6	6	6	4	6	6	6	6	6	5	0	0	0	0	0	0
155	1	Bachelor's degree	2	7	0	1	0	1	1	0	0	1	0	1	0	0	0	0	1	0	0	0	6	0	0	0	0	3	3	3	3	5	1	3	3	3	3	4	4	6	3	6	6	1	0	1	0	0	0
325	1	Bachelor's degree	2	1	1	1	0	1	0	0	0	0	1	0	0	1	1	0	0	0	0	0	6	50	30	20	33.3333	5	6	4	5	6	5	5	4	6	4	6	5	5	5	4	5	0	0	0	0	0	0
635	2	Bachelor's degree	2	4	1	0	1	1	0	1	0	1	1	0	1	0	0	0	0	0	0	0	7	0	0	0	0	6	5	5	5	6	3	6	6	5	5	6	6	6	5	5	6	1	0	1	0	0	1
319	2	Bachelor's degree	2	4	0	0	0	1	0	0	1	0	0	0	0	1	0	1	1	0	0	0	5	60	40	80	60	5	4	3	5	5	3	5	5	4	4	3	5	4	3	3	5	1	0	0	0	0	0
801	1	Bachelor's degree	2	5	1	1	1	1	0	0	0	0	0	1	1	1	0	0	0	1	0	0	8	1	1	0	0.666667	3	5	2	2	6	1	4	4	2	3	2	6	5	3	4	4	1	0	0	0	0	0
566	1	Bachelor's degree	2	5	0	0	1	1	0	1	0	1	1	0	1	0	0	0	0	1	1	0	8	0	0	0	0	6	6	6	6	6	6	6	6	6	6	6	6	6	6	6	6	0	0	0	0	1	0
526	2	Bachelor's degree	2	4	1	0	1	1	0	1	0	1	1	1	1	1	0	0	0	1	1	1	12	5	15	25	15	4	3	1	5	2	3	5	5	3	1	2	6	4	2	5	1	1	0	1	0	0	0
626	1	Bachelor's degree	2	1	0	0	0	1	0	0	0	1	1	0	1	0	0	1	0	1	1	1	8	5	8	25	12.6667	2	1	2	2	1	2	3	2	2	1	2	2	2	1	3	2	1	1	1	1	1	0
601	1	Bachelor's degree	2	4	1	0	0	0	0	0	0	0	1	0	0	0	0	0	0	1	0	0	3	10	3	5	6	6	5	5	6	6	5	5	5	6	6	5	6	5	6	6	6	1	0	0	0	0	0
411	1	Bachelor's degree	2	4	0	0	0	1	0	0	0	0	1	0	0	0	0	0	0	0	0	0	2	0	0	5	1.66667	4	4	3	3	4	3	4	4	4	3	3	4	4	4	3	4	1	0	1	0	0	0
229	1	Bachelor's degree	2	2	1	1	0	1	0	0	0	0	1	1	0	0	0	0	0	0	1	0	6	20	20	1	13.6667	5	4	5	5	5	6	6	4	5	5	5	5	6	6	6	6	0	0	1	0	0	0
51	2	Bachelor's degree	2	4	0	0	0	1	0	0	0	0	0	0	0	1	0	0	0	0	1	0	3	100	100	30	76.6667	5	5	5	6	5	5	5	3.5	3	4	3	2	4	5	5	5	1	0	0	0	0	0
454	1	Bachelor's degree	2	6	0	0	0	1	0	0	0	1	1	1	1	1	0	1	0	1	1	0	9	0	0	2	0.666667	5	4	4	5	6	1	5	5	6	5	6	6	6	5	6	5	1	0	1	0	0	0
777	1	Bachelor's degree	2	2	0	0	0	0	0	0	1	1	1	0	0	0	0	0	1	1	0	1	6	22	22	22	22	5	5	5	6	5	6	6	5	5	6	6	5	6	5	5	6	0	0	0	0	0	0
483	1	Bachelor's degree	2	6	0	0	1	1	0	0	0	0	0	1	1	0	0	0	0	1	1	1	7	10	10	40	20	5	5	5	5	5	6	5	5	4	4	4	4	4	5	4	4	0	0	1	0	0	0
268	1	Bachelor's degree	2	2	1	0	0	1	1	1	0	1	1	0	1	1	1	1	0	1	1	1	13	0	15	20	11.6667	5	5	2	2	1	1	4	5	2	2	1	6	5	2	4	1	1	1	1	1	1	1
510	1	Bachelor's degree	2	4	1	0	1	1	0	0	0	1	0	0	0	0	0	1	0	0	0	1	6	60	50	40	50	5	6	3	4	6	1	4	3	5	2	6	6	3	4	2	6	1	0	1	0	0	0
76	2	Bachelor's degree	2	6	0	0	1	0	0	0	0	0	0	0	0	0	0	0	1	0	1	0	3	45	34	50	43	4	5	5	3	4	3.5	4	5	4	5	5	4	5	4	6	4	1	1	1	0	0	0
32	2	Bachelor's degree	2	3	1	0	1	1	0	0	1	0	0	1	1	1	0	1	0	1	0	0	9	4	4	20	9.33333	4	3	3	5	5	2	3	4	3	2	3	6	4	2	4	2	1	1	1	0	0	0
908	2	Graduate degree	2	1	0	0	0	1	1	0	0	0	0	0	0	0	0	0	0	0	0	0	2	2	5	5	4	6	6	6	5	5	5	5	6	5	6	6	6	5	6	6	5	0	0	1	0	0	0
63	1	Graduate degree	2	6	1	0	0	0	0	1	0	0	0	0	0	0	0	0	0	0	1	0	3	60	50	50	53.3333	5	6	5	4	3	6	5	4	5	5	6	5	4	3	2	3	0	0	1	0	0	0
917	1	Bachelor's degree	2	4	1	1	0	1	0	0	0	1	1	0	1	1	1	0	0	1	1	1	11	5	10	20	11.6667	4	4	3	3	3	2	4	4	3	3	2	3	3	3	4	4	1	1	1	1	1	1
180	2	Graduate degree	2	7	0	0	1	0	0	0	0	0	1	1	0	0	0	0	1	0	1	0	5	60	59	50	56.3333	6	6	6	5	5	5	6	6	6	5	5	5	6	6	6	6	0	1	0	0	0	1
338	1	Bachelor's degree	2	2	0	0	1	1	0	0	0	1	0	1	1	0	0	0	0	1	0	1	7	5	5	9	6.33333	6	6	2	2	6	1	5	5	6	1	5	5	6	4	3	2	0	0	1	0	0	0
592	1	Graduate degree	2	6	1	1	1	1	0	1	0	0	1	0	0	1	1	1	0	1	0	0	10	20	10	16	15.3333	4	3	3	4	4	4	3	4	4	4	3	2	2	2	2	2	0	0	0	0	0	0
1025	2	Graduate degree	2	4	0	0	0	0	0	0	1	1	0	0	0	0	0	0	0	0	1	1	4	9	8	9	8.66667	5	5	4	5	5	5	4	5	4	5	5	4	5	4	5	4	0	0	0	0	0	0
462	1	Bachelor's degree	2	4	0	0	0	1	0	0	0	0	1	1	0	1	1	0	0	0	0	0	5	0	0	1	0.333333	3	3	3	3	3	4	3	3	3	3	3	3	3	4	4	4	1	0	0	0	1	0
581	1	Graduate degree	2	4	1	0	1	0	0	0	1	1	0	0	0	0	0	0	1	0	0	1	6	10	50	100	53.3333	4	5	4	4	4	5	4	4	4	3	4	3	1	4	4	4	0	0	0	0	0	0
240	1	Bachelor's degree	2	5	0	0	0	1	1	0	0	1	1	1	0	1	0	0	0	1	0	0	7	20	33	10	21	4	4	4	4	4	4	4	4	4	4	3	1	2	4	3	3	0	0	0	0	0	0
887	1	Graduate degree	2	6	0	0	0	1	0	1	1	0	1	0	1	0	0	1	0	1	0	0	7	0	10	0	3.33333	6	6	5	2	2	6	6	2	1	6	2	1	4	2	6	6	0	1	1	1	0	1
807	2	Bachelor's degree	2	4	0	0	0	1	0	0	0	1	0	0	0	1	1	0	1	0	1	0	6	56	40	45	47	2	3	5	2	4	4	4	3	2	5	4	4	5	5	4	4	1	1	0	0	0	0
474	2	High school diploma or GED	1	4	1	0	0	1	0	0	0	1	0	0	1	0	1	0	0	1	0	0	6	10	2	10	7.33333	5	3	4	2	4	1	4	3	4	2	2	4	4	4	4	6	1	0	1	1	0	0
280	2	Some college (no degree)	1	7	1	0	0	1	0	0	0	1	0	1	1	1	0	1	0	0	0	0	7	15	15	50	26.6667	4	3	3	4	3	3	4	3	4	3	4	4	4	3	3	4	1	0	1	0	1	0
315	1	Some college (no degree)	1	4	1	0	1	1	0	0	0	1	1	1	1	1	1	0	0	1	1	1	12	5	10	5	6.66667	6	6	1	6	1	1	4	1	1	1	1	6	6	1	6	1	1	0	1	0	0	0
993	2	Bachelor's degree	2	6	1	1	0	1	0	0	0	0	1	1	1	1	0	1	0	1	1	1	11	5	25	30	20	5	4	5	5	5	2	5	5	3	3	3	5	4	3	4	4	1	0	1	0	0	0
690	1	Some college (no degree)	1	4	1	0	0	1	0	0	0	0	0	1	0	0	0	0	0	0	0	0	3	5	5	10	6.66667	6	6	5	6	6	3	6	6	6	5	4	6	6	5	6	6	0	0	0	0	0	0
246	1	Bachelor's degree	2	5	1	0	0	1	0	1	0	0	1	0	0	0	1	0	0	1	1	0	7	25	35	50	36.6667	3	6	3	3	5	5	6	6	6	6	6	5	5	5	5	5	0	0	0	0	0	0
951	2	Associate's degree	2	2	0	0	1	0	0	0	0	0	0	0	0	0	0	0	0	0	0	0	1	50	65	3	39.3333	5	4	4	5	5	5	4	4	4	4	4	4	5	4	5	4	0	0	0	0	0	0
397	1	Bachelor's degree	2	4	0	0	0	1	0	0	0	1	0	1	1	1	0	0	0	1	0	0	6	5	0	10	5	4	4	4	4	4	4	4	5	4	4	4	5	5	5	5	5	1	1	1	0	0	0
261	1	Bachelor's degree	2	5	0	0	1	1	0	0	0	1	0	0	1	1	0	0	0	1	0	0	6	10	10	20	13.3333	4	4	2	3	4	2	3	4	3	3	4	4	4	4	4	3	1	1	1	0	0	0
441	1	Associate's degree	2	7	0	0	0	1	0	1	0	1	0	0	1	0	0	0	0	0	0	0	4	5	5	0	3.33333	6	5	4	6	5	3	5	5	4	6	5	4	4	5	5	5	1	0	0	0	0	0
264	2	Bachelor's degree	2	2	0	0	1	1	0	1	0	1	0	1	1	1	1	0	0	1	0	0	9	0	10	40	16.6667	5	5	3	4	5	1	3	5	5	2	5	5	4	2	4	1	1	1	1	0	0	0
859	1	Bachelor's degree	2	5	1	0	0	1	0	0	0	1	1	0	1	0	0	0	0	1	1	0	7	5	5	20	10	5	5	3	5	5	1	4	4	4	2	2	5	5	3	4	1	1	1	1	0	0	0
495	1	Associate's degree	2	2	0	0	0	0	0	0	0	0	1	1	0	0	0	0	0	0	0	1	3	25	15	20	20	2	4	3	4	3	2	4	2	4	4	2	5	3	4	5	3	0	0	0	0	1	0
272	1	Bachelor's degree	2	2	1	0	1	1	0	0	0	0	1	0	0	0	0	0	0	1	0	0	5	10	10	20	13.3333	3	4	4	4	3	4	3	4	4	4	3	3	4	4	3	3	1	0	0	0	0	1
390	2	Bachelor's degree	2	6	0	0	1	1	0	0	1	0	1	0	0	1	0	0	0	1	0	0	6	50	75	15	46.6667	6	6	6	6	6	6	6	6	6	6	6	6	6	6	6	6	0	0	0	0	1	0
849	2	Graduate degree	2	4	0	0	0	1	0	0	0	1	1	0	0	1	0	0	0	1	1	0	6	10	10	60	26.6667	6	6	6	6	5	6	5	6	5	5	6	5	6	6	5	6	1	0	1	0	0	0
402	2	Bachelor's degree	2	1	0	0	0	1	0	0	0	1	0	1	0	1	0	0	0	1	0	1	6	0	0	0	0	5	6	6	5	5	1	5	5	5	4	5	5	6	5	4	5	1	0	0	0	0	0
437	1	High school diploma or GED	1	5	0	0	1	1	0	0	0	0	0	0	0	0	0	0	0	0	0	0	2	0	5	25	10	6	6	5	5	5	5	6	6	6	6	5	6	6	5	6	6	0	0	0	0	0	1
350	2	High school diploma or GED	1	4	0	0	0	0	0	0	0	1	1	1	1	1	0	1	0	1	1	1	9	1	1	10	4	2	4	1	4	6	1	3	5	5	1	4	5	4	1	5	1	1	1	1	0	0	0
376	2	Some college (no degree)	1	4	1	0	1	1	0	0	0	1	0	0	1	1	0	0	0	1	1	0	8	5	5	25	11.6667	5	2	5	3	6	1	2	3	4	1	4	5	5	5	5	4	0	0	0	0	0	0
617	2	Bachelor's degree	2	5	1	0	0	1	0	0	0	0	1	0	1	0	0	0	0	0	0	1	5	0	0	30	10	3	5	4	4	5	5	4	5	3	5	3	3	5	4	4	5	1	0	1	0	0	0
339	2	Graduate degree	2	2	1	1	1	0	1	0	0	0	1	0	0	1	1	0	0	0	0	0	7	20	35	30	28.3333	4	6	3	5	3	4	5	3	4	6	4	3	2	4	5	4	0	0	0	0	0	0
862	1	Bachelor's degree	2	4	1	1	0	1	0	0	0	1	0	0	0	0	0	0	0	0	1	0	5	70	50	50	56.6667	4	3	3	5	4	1	4	4	4	2	1	4	3	4	4	4	0	1	0	0	0	0
115	1	Graduate degree	2	4	1	1	0	1	0	0	1	0	0	1	0	0	0	1	1	0	1	0	8	10	5	8	7.66667	5	5	6	5	5	5	5	5	5	5	4	4	4	5	5	4	1	0	0	0	0	1
231	1	High school diploma or GED	1	6	1	1	1	0	1	0	0	0	0	0	0	0	0	0	0	0	0	1	5	4	2	2	2.66667	2	3	4	4	2	2	3	4	4	3	2	2	2	2	5	3	0	0	1	0	0	0
663	1	Bachelor's degree	2	3	0	0	0	1	0	0	0	0	0	1	0	1	0	0	0	0	1	0	4	1	1	10	4	3	4	3	4	3	1	4	3	3	3	4	4	4	2	3	1	1	1	1	0	0	0
72	2	Bachelor's degree	2	4	0	1	1	1	0	0	0	1	0	1	1	1	1	1	0	1	0	0	10	10	25	50	28.3333	4	5	3	5	3	1	4	4	4	3	4	5	6	4	6	1	1	1	1	1	0	0
574	2	Some college (no degree)	1	1	1	0	1	1	1	0	0	0	0	1	0	0	0	0	0	0	0	0	5	55	55	55	55	1	2	4	4	4	5	4	4	4	4	5	4	4	5	5	4	0	0	0	0	0	0
504	1	Associate's degree	2	4	0	0	0	1	0	1	0	0	1	0	0	1	0	0	0	1	0	0	5	0	0	5	1.66667	4	4	3	5	5	1	4	5	4	3	5	5	6	3	5	2	1	0	1	0	0	0
1011	1	Bachelor's degree	2	2	0	0	0	0	0	0	0	0	1	0	0	1	1	1	1	0	0	0	5	100	30	70	66.6667	5	5	4	5	6	4	5	6	5	5	4	5	5	6	5	4	0	0	0	0	0	0
489	1	Bachelor's degree	2	2	1	0	0	1	0	0	0	1	1	1	0	1	0	0	0	1	1	1	9	0	0	25	8.33333	5	5	3	3	6	1	5	5	4	2	2	5	5	3	5	1	1	1	0	0	0	1
534	1	Bachelor's degree	2	4	1	0	0	1	0	0	0	0	1	0	1	0	0	0	0	1	1	0	6	70	60	6	45.3333	3	3	4	5	4	4	4	3	3	4	3	5	4	4	3	3	0	0	1	0	0	0
853	1	Graduate degree	2	7	0	0	0	0	0	0	1	1	0	0	0	0	0	1	0	0	0	0	3	80	90	100	90	6	6	6	6	6	6	6	6	6	6	6	6	6	6	6	6	0	0	0	0	0	0
943	1	Graduate degree	2	7	0	0	1	0	0	0	0	1	0	0	0	0	0	0	0	0	0	0	2	99	90	80	89.6667	6	5	6	6	5	6	6	5	4	5	6	6	5	5	6	6	0	0	0	0	0	0
841	2	High school diploma or GED	1	4	1	1	1	1	0	1	0	0	1	1	1	1	0	1	0	1	1	1	13	0	0	20	6.66667	6	6	2	1	1	1	1	6	6	1	1	6	6	1	6	1	1	1	1	1	0	0
1	1	Some college (no degree)	1	4	0	0	0	1	0	1	0	0	0	0	0	0	0	0	0	0	0	1	3	0	0	0	0	4	4	4	4	4	4	4	4	4	4	4	4	4	4	4	4	0	0	0	0	0	0
351	2	Some college (no degree)	1	5	0	0	1	1	0	0	0	1	1	1	1	1	0	1	0	1	1	1	11	2	15	25	14	2	3	2	2	2	1	2	3	2	2	2	2	3	2	3	2	1	1	1	1	1	1
711	2	Bachelor's degree	2	4	0	0	0	1	0	0	0	1	1	0	0	1	0	0	0	1	1	0	6	10	10	5	8.33333	4	5	3	5	2	2	4	5	6	4	6	6	5	3	6	6	0	0	0	0	0	0
991	2	Bachelor's degree	2	7	1	0	0	1	0	0	0	1	1	1	1	1	1	0	0	1	1	0	10	0	20	40	20	4	4	6	5	5	1	6	5	4	2	5	6	6	5	5	6	1	1	1	1	0	1
535	2	Some college (no degree)	1	2	0	0	0	1	0	0	0	0	1	1	0	1	0	0	0	1	0	1	6	79	58	25	54	3	4	3	5	3	4	4	4	4	4	3	1	4	2	4	3	0	0	0	0	0	0
657	1	Bachelor's degree	2	6	0	0	0	0	0	0	0	0	1	1	1	1	0	0	0	0	1	1	6	10	10	20	13.3333	3	4	3	2	2	3	5	4	4	2	3	4	4	3	2	3	1	0	1	0	0	0
698	1	Bachelor's degree	2	7	0	0	0	1	0	0	0	0	0	1	0	1	1	0	0	1	1	0	6	38	60	10	36	6	6	6	6	6	6	6	6	6	6	6	6	6	6	6	6	1	0	0	0	0	0
909	1	Bachelor's degree	2	1	1	0	0	0	0	1	0	0	0	0	0	1	0	0	0	0	0	0	3	58	52	7	39	6	6	6	5	5	6	6	6	6	6	6	5	5	5	5	5	0	0	1	0	0	0
258	2	Bachelor's degree	2	4	0	0	0	0	0	0	0	0	0	0	0	1	0	0	0	0	0	0	1	85	10	25	40	4	4	3	2	4	3	3	3	2	3	2	2	4	4	2	4	1	0	1	0	0	0
759	2	Graduate degree	2	6	0	0	1	1	0	1	0	0	0	0	0	0	0	0	0	0	0	0	3	20	30	30	26.6667	5	4	6	5	4	5	5	2	6	5	5	5	4	5	6	5	0	0	0	0	0	0
942	1	Bachelor's degree	2	3	0	0	0	0	0	0	1	0	0	1	0	0	0	0	0	1	0	0	3	60	5	20	28.3333	4	4	4	4	5	5	5	4	4	4	4	4	5	5	5	6	0	1	0	0	0	0
487	2	Graduate degree	2	3	1	0	1	1	0	1	0	1	0	1	1	1	0	0	0	1	0	1	10	5	0	50	18.3333	5	6	2	3	5	1	5	5	2	3	2	5	5	2	2	1	1	1	1	1	0	1
226	1	High school diploma or GED	1	1	0	0	0	0	0	0	0	0	0	0	0	0	0	0	1	1	0	1	3	5	1	2	2.66667	1	1	1	1	1	1	1	1	1	1	1	1	1	1	1	1	0	0	0	0	0	0
537	2	Some college (no degree)	1	6	1	1	0	1	0	0	0	1	1	1	0	1	0	0	0	0	0	0	7	0	0	5	1.66667	3	4	4	3	5	1	3	3	4	4	5	5	5	4	5	5	0	1	0	0	0	0
95	1	Associate's degree	2	4	0	0	0	0	1	0	0	0	0	0	0	0	1	0	0	0	0	1	3	15	10	15	13.3333	5	2	2	3	3	3	6	3	4	6	5	4	4	3	1	6	1	0	1	0	0	0
554	2	Bachelor's degree	2	3	0	0	0	1	0	0	0	0	0	1	0	0	0	0	1	1	0	1	5	10	15	10	11.6667	3	3	3	3	3	3	3	3	3	3	3	3	3	3	3	3	1	0	0	0	0	0
153	1	Bachelor's degree	2	6	1	0	0	1	0	1	0	1	1	0	0	1	1	1	0	1	1	1	11	5	15	25	15	1	6	1	6	6	1	2	4	1	3	1	5	6	1	6	1	0	1	1	1	0	0
937	2	Bachelor's degree	2	2	0	0	0	1	0	0	0	1	1	0	0	0	0	0	0	0	0	0	3	60	56	20	45.3333	5	4	4	4	4	5	4	4	5	5	5	4	4	4	4	5	0	0	1	0	0	0
469	1	Bachelor's degree	2	2	1	1	0	1	0	0	0	1	1	1	0	1	0	1	0	1	0	0	9	0	0	5	1.66667	3	4	2	2	5	4	3	5	2	2	3	4	3	4	3	4	0	0	1	0	0	0
786	2	Bachelor's degree	2	4	0	0	1	1	0	0	0	0	0	0	0	1	1	0	1	1	0	0	6	0	0	0	0	4	4	5	6	6	1	5	5	5	5	5	5	5	5	5	5	0	0	0	0	0	0
363	2	Bachelor's degree	2	1	1	0	1	1	0	0	1	0	0	1	1	0	0	0	0	1	0	1	8	80	0	0	26.6667	5	5	4	3	4	5	3	5	5	2	4	5	4	5	4	4	0	0	0	0	0	0
611	1	Bachelor's degree	2	6	1	0	0	0	0	0	0	0	1	1	1	0	1	0	0	1	0	0	6	10	25	20	18.3333	3	3	3	4	4	1	2	3	3	3	2	3	3	3	2	2	1	1	0	0	0	0
923	2	Bachelor's degree	2	2	1	1	0	1	0	0	0	1	1	1	1	1	1	0	1	1	0	0	11	0	0	0	0	4	4	3	5	5	1	4	4	4	4	1	4	4	1	4	4	1	1	0	1	0	0
99	2	Bachelor's degree	2	4	0	0	0	1	0	0	0	0	1	1	1	1	1	1	0	1	1	0	9	0	0	0	0	1	1	1	1	1	2	3	3	2	3	3	3	1	1	4	4	0	0	0	0	0	0
604	2	Bachelor's degree	2	7	1	1	1	0	0	0	0	0	1	1	1	1	1	1	0	1	1	0	11	20	20	90	43.3333	4	4	5	5	5	3	5	5	5	2	3	6	5	4	4	6	1	0	0	0	0	0
202	2	High school diploma or GED	1	7	0	0	0	0	0	1	1	0	1	1	0	0	0	1	0	0	0	0	5	6	5	3	4.66667	2	2	3	4	3	4	3	3	5	6	4	4	4	3	3	2	0	0	0	0	0	0
645	1	Bachelor's degree	2	2	1	1	0	1	0	0	0	0	1	0	1	1	0	1	0	1	0	0	8	10	5	10	8.33333	5	5	3	4	4	2	5	5	3	3	3	4	5	2	4	2	1	1	1	0	0	1
137	1	Some college (no degree)	1	1	1	0	0	1	0	0	0	0	0	0	0	0	0	0	0	0	0	0	2	50	40	40	43.3333	4	4	4	4	4	5	3	3	4	4	3	4	4	4	4	4	0	0	0	0	0	0
558	1	Bachelor's degree	2	4	1	0	1	1	0	0	0	0	1	0	1	0	0	0	0	0	1	1	7	20	60	60	46.6667	6	6	6	6	6	6	6	6	6	6	6	6	6	6	6	6	0	0	0	0	0	0
928	1	Associate's degree	2	4	0	0	0	1	0	1	0	0	1	0	0	0	1	0	0	0	0	0	4	40	30	25	31.6667	4	4	4	4	4	4	4	4	1	2	2	2	4	2	4	4	0	0	0	0	0	0
947	2	Bachelor's degree	2	7	1	0	0	0	0	0	0	0	0	1	0	0	1	0	0	0	0	0	3	60	50	20	43.3333	4	4	2	6	6	5	5	5	4	4	5	5	5	5	4	5	0	0	0	0	0	0
90	2	Bachelor's degree	2	2	1	0	0	1	0	0	0	1	1	1	0	1	0	0	0	0	1	1	8	0	0	0	0	5	5	3	5	4	1	5	5	5	4	1	5	5	3	4	1	1	0	0	0	0	0
455	1	Bachelor's degree	2	4	1	0	0	1	0	0	0	1	1	1	0	0	1	0	0	0	1	0	7	0	0	40	13.3333	4	4	4	4	4	4	3	4	5	4	3	4	4	4	4	4	1	0	0	0	0	0
886	2	High school diploma or GED	1	3	1	0	1	1	0	1	0	0	0	0	0	0	0	0	0	0	1	0	5	50	1	1	17.3333	4	4	4	3	4	4	3	4	5	4	4	3	4	4	3	4	0	0	1	0	0	1
433	1	High school diploma or GED	1	5	1	0	0	1	0	0	0	1	1	1	0	0	0	0	0	0	0	0	5	0	0	0	0	5	4	4	4	4	5	5	6	5	3	4	5	5	5	4	4	1	1	1	0	0	1
486	2	High school diploma or GED	1	3	1	0	0	1	0	1	0	1	0	1	1	1	0	0	0	0	1	0	8	2	0	1	1	4	5	3	5	6	1	6	6	6	3	6	6	6	4	6	6	1	0	0	0	0	0
15	1	Bachelor's degree	2	1	0	0	1	1	0	0	0	1	1	1	1	1	1	0	0	1	1	0	10	0	0	0	0	6	1	1	1	1	1	1	1	1	1	1	1	6	1	1	1	1	0	0	0	0	0
1006	1	Bachelor's degree	2	4	1	0	0	1	0	0	0	1	1	1	0	1	0	1	0	1	1	0	9	5	2	4	3.66667	3	5	2	2	6	2	5	6	3	2	5	6	6	4	5	6	0	0	0	0	0	0
417	1	High school diploma or GED	1	4	1	0	0	1	0	1	0	1	0	1	0	1	1	1	0	1	0	0	9	0	20	50	23.3333	3	5	3	3	5	1	4	5	5	3	3	6	6	4	4	4	1	1	1	0	0	0
57	1	Associate's degree	2	2	0	0	0	0	0	0	0	0	0	1	1	0	0	0	0	1	0	1	4	33	33	22	29.3333	3	2	1	2	5	3	2	1	1	5	4	3	2	5	3	1	0	0	0	0	0	0
568	2	Graduate degree	2	4	0	0	0	0	0	0	0	0	0	0	0	0	0	0	0	0	0	0	0	50	30	20	33.3333	6	5	6	6	6	5	6	6	6	6	5	6	6	6	6	5	1	0	0	0	0	0
364	1	Bachelor's degree	2	7	0	0	0	0	0	0	0	0	0	0	0	0	0	1	0	1	0	0	2	30	60	6	32	5	3	4	4	3	4	4	4	5	4	4	4	5	4	4	3	0	0	0	0	0	0
724	2		1.5	4	1	0	1	0	0	1	1	0	0	0	0	0	0	0	1	1	0	0	6	50	50	50	50	5	6	5	6	5	6	5	6	5	6	5	6	5	6	5	6	1	0	0	0	0	0
921	1	Bachelor's degree	2	6	0	0	0	1	0	1	0	1	1	1	1	1	1	0	0	1	0	1	10	2	30	30	20.6667	2	2	3	5	2	1	3	4	2	3	2	5	3	2	5	4	1	1	1	1	1	1
824	1	Associate's degree	2	2	1	0	0	1	0	0	0	1	0	0	0	1	0	0	0	0	0	0	4	10	10	10	10	4	4	5	1	1	4	6	1	1	5	2	1	1	2	1	6	0	0	1	0	0	0
352	2	Bachelor's degree	2	3	1	0	1	1	0	0	0	0	1	0	1	1	0	0	0	1	1	0	8	3	15	35	17.6667	4	6	4	2	4	1	2	3	4	2	5	5	6	4	4	4	1	1	1	1	0	1
61	2	Bachelor's degree	2	1	1	0	0	0	0	0	0	0	0	1	1	1	0	0	1	1	1	0	7	0	0	0	0	6	6	6	6	6	1	6	6	6	6	6	6	6	6	6	6	1	0	0	0	0	0
79	2	Bachelor's degree	2	4	0	0	0	1	0	0	1	1	0	0	1	0	0	0	0	1	1	0	6	100	2	0	34	6	6	6	6	6	3	6	6	6	5	6	6	6	6	6	6	0	0	1	0	0	0
913	1	Bachelor's degree	2	6	1	0	0	1	0	1	0	0	0	1	0	0	0	1	0	1	1	0	7	10	10	5	8.33333	5	5	5	4	5	2	5	5	5	3	5	5	5	4	5	5	1	1	0	0	0	0
606	2	Some college (no degree)	1	2	1	0	0	1	0	1	0	0	0	0	0	0	0	0	0	0	0	1	4	5	4	3	4	2	5	3	6	6	5	5	6	5	6	6	6	6	6	6	6	1	0	1	0	0	0
347	1	Bachelor's degree	2	3	1	0	0	1	0	1	1	1	1	0	1	0	0	1	1	0	0	0	9	25	30	50	35	4	4	2	5	4	5	4	4	3	5	5	4	4	5	5	5	0	0	0	0	0	0
902	2	Bachelor's degree	2	4	0	0	0	1	1	0	1	0	0	0	0	0	1	0	0	0	0	0	4	50	50	5	35	6	6	6	6	6	6	6	6	6	6	6	6	6	6	6	6	0	0	0	0	0	0
449	2	Less than high school diploma	1	4	0	0	0	0	0	0	0	0	0	0	0	0	0	0	1	0	0	0	1	80	75	90	81.6667	3	5	6	1	6	6	5	6	6	4	1	1	5	5	6	6	0	0	0	0	0	0
134	2	Bachelor's degree	2	5	0	0	1	1	0	0	0	1	1	0	0	0	1	0	0	1	0	0	6	5	8	10	7.66667	5	6	4	4	5	1	3	2	2	1	6	6	6	1	5	4	0	0	0	0	0	0
326	1	High school diploma or GED	1	2	0	0	1	1	0	0	1	0	0	0	1	0	0	0	0	1	0	1	6	50	50	50	50	4	4	2	2	3	5	5	3	3	4	4	6	5	3	4	4	0	0	0	0	0	0
522	1	Bachelor's degree	2	4	0	0	0	1	0	0	0	1	0	1	0	0	0	0	0	1	0	0	4	0	0	100	33.3333	3	3	3	3	4	3	3	3	3	3	3	4	4	3	4	3	1	1	1	1	0	0
75	2	Bachelor's degree	2	2	1	0	0	1	0	0	0	0	1	0	1	1	0	0	0	1	1	1	8	0	0	0	0	5	4	2	3	5	1	2	2	1	1	4	2	5	1	6	1	1	0	0	0	0	0
633	2	Bachelor's degree	2	2	1	0	1	1	0	0	1	0	1	1	1	1	1	1	0	1	1	1	13	0	1	5	2	4	5	4	4	4	1	3	3	3	3	4	4	6	3	6	2	1	0	0	0	0	0
192	2	Bachelor's degree	2	4	0	0	0	1	0	0	0	1	0	0	0	1	1	0	0	0	1	0	5	0	10	15	8.33333	5	6	4	3	1	1	3	6	6	4	2	1	6	4	6	6	1	0	0	0	0	0
219	1	High school diploma or GED	1	5	0	0	0	0	0	0	0	1	0	1	0	1	0	0	0	0	0	0	3	50	5	5	20	3	4	5	4	5	5	5	5	4	3	3	4	5	5	4	4	0	0	0	0	0	0
707	2	High school diploma or GED	1	3	0	0	0	1	0	0	0	0	0	0	0	0	0	0	0	1	0	0	2	10	10	25	15	5	6	4	5	4	3	5	2	2	5	4	5	6	4	3	6	0	0	1	0	0	0
476	2	Some college (no degree)	1	1	0	0	0	1	1	0	0	1	0	1	0	0	1	0	0	0	1	0	6	5	5	10	6.66667	6	6	2	3	6	1	4	5	4	4	4	4	5	2	2	1	1	1	0	0	1	0
540	1	Bachelor's degree	2	1	0	0	0	1	0	0	1	0	0	0	0	0	0	0	1	0	0	0	3	40	70	2	37.3333	3	3	4	3	3	4	3	3	3	3	3	4	4	3	3	5	1	1	0	0	0	0
531	1	Bachelor's degree	2	7	0	0	1	1	0	0	0	1	1	0	0	0	0	0	0	1	1	1	7	0	0	5	1.66667	3	4	5	6	6	1	6	6	6	3	5	6	4	4	4	6	0	0	1	0	0	0
60	1	Bachelor's degree	2	1	1	0	0	1	0	0	1	1	0	0	0	0	1	1	1	1	0	0	8	15	5	25	15	6	6	6	5	6	5	5	6	6	6	6	6	5	6	5	6	0	0	0	0	0	0
835	2	Graduate degree	2	1	0	0	0	1	0	0	0	1	0	1	0	0	0	0	0	0	0	0	3	2	2	3	2.33333	6	6	6	6	6	6	6	6	6	6	6	6	6	6	6	6	0	0	1	0	0	0
575	1	Graduate degree	2	1	0	0	0	0	0	0	0	0	0	1	0	0	0	0	0	0	0	1	2	67	33	55	51.6667	6	6	6	6	6	6	6	6	6	5	6	6	6	6	6	6	0	0	0	0	0	0
787	2	Bachelor's degree	2	2	1	0	1	1	0	1	1	0	1	0	1	1	0	0	0	1	0	0	9	30	30	0	20	5	5	5	4	5	5	4	4	5	4	5	5	4	4	4	5	0	0	0	0	0	0
179	1	Bachelor's degree	2	2	1	0	1	1	0	1	0	1	1	1	1	1	0	0	0	1	1	0	11	0	5	0	1.66667	3	5	3	3	2	2	5	5	3	1	1	5	4	2	3	1	1	1	1	0	0	1
967	2	Bachelor's degree	2	4	1	0	0	1	0	0	0	1	1	1	1	1	0	0	0	1	1	1	10	3	10	5	6	4	5	2	2	3	1	5	5	2	1	1	6	6	2	5	4	1	1	1	1	1	1
781	2	Graduate degree	2	3	1	0	0	0	0	1	0	1	0	0	0	0	0	0	0	0	0	1	4	10	13	30	17.6667	4	5	2	5	6	6	5	4	5	6	5	4	6	6	5	6	0	0	0	0	0	0
959	2	Graduate degree	2	3	1	0	1	1	0	0	0	0	1	1	1	1	1	0	0	1	1	1	11	20	10	10	13.3333	4	3	3	3	3	4	6	4	4	5	4	5	3	4	4	3	0	0	0	0	0	1
560	1	High school diploma or GED	1	7	0	0	0	0	0	0	1	0	0	0	0	0	0	0	1	0	0	0	2	0	0	0	0	2	2	2	6	6	6	5	5	5	6	5	4	1	1	5	1	0	0	0	0	0	0
933	1	High school diploma or GED	1	4	0	0	0	0	0	1	0	0	0	0	0	1	0	0	0	0	0	0	2	0	0	1	0.333333	5	6	6	4	5	3	6	6	6	6	6	5	3	4	4	4	1	0	0	0	0	0
735	1	High school diploma or GED	1	4	0	0	1	1	0	0	0	1	0	1	1	0	0	0	0	0	0	0	5	0	0	0	0	4	4	4	4	4	4	4	4	4	4	5	4	4	4	4	4	1	0	1	0	0	0
630	2	Some college (no degree)	1	4	0	0	0	1	0	0	0	1	0	0	0	0	1	0	1	1	0	0	5	6	5	5	5.33333	4	5	4	4	4	4	5	3	4	4	3	3	2	4	3	6	0	1	1	0	0	0
453	1	Graduate degree	2	2	1	0	0	1	0	0	0	0	0	0	1	0	0	0	1	1	0	0	5	50	50	20	40	3	5	5	5	4	1	4	5	5	5	5	5	5	4	4	3	0	0	0	0	0	0
890	2	Graduate degree	2	7	0	0	1	1	0	0	0	0	0	0	1	1	0	0	1	0	0	1	6	50	50	30	43.3333	5	5	5	5	5	5	5	5	5	5	5	5	5	5	5	5	0	0	0	0	0	0
111	2	High school diploma or GED	1	1	1	1	0	1	0	0	1	0	0	0	0	0	0	0	0	1	0	1	6	10	0	5	5	4	5	4	6	5	3	3	2	2	5	2	2	5	5	5	5	1	0	0	0	0	0
458	1	High school diploma or GED	1	4	0	0	1	1	0	0	0	1	1	1	1	1	0	0	0	1	1	0	9	5	5	10	6.66667	6	6	6	4	5	1	6	1	4	4	4	4	6	4	5	4	1	1	1	0	0	0
138	1	Graduate degree	2	4	0	0	0	1	0	0	0	0	0	1	0	1	0	0	0	1	1	0	5	60	10	0	23.3333	6	6	6	6	6	6	6	6	6	6	5	6	5	6	6	6	0	0	0	0	0	0
404	2	Some college (no degree)	1	5	0	0	0	1	0	0	1	0	0	0	0	0	1	0	0	0	0	0	3	20	40	40	33.3333	5	5	3	3	5	6	4	3	4	4	5	4	4	4	4	4	1	0	1	0	0	0
249	2	Graduate degree	2	6	1	0	0	1	0	0	0	0	0	0	1	0	0	1	0	1	0	1	6	0	0	0	0	4	3	3	3	4	1	1	2	1	2	2	2	1	2	3	1	1	0	0	0	0	0
666	1	Bachelor's degree	2	4	1	0	0	1	0	1	0	1	1	1	1	1	0	1	0	1	1	0	11	1	5	10	5.33333	4	5	1	1	1	1	5	6	5	1	1	6	6	5	3	1	1	1	1	0	0	0
935	1	Graduate degree	2	7	1	0	0	0	0	0	0	1	0	0	0	0	0	0	0	0	0	0	2	10	20	20	16.6667	6	6	6	6	6	5	5	5	5	6	6	6	6	6	6	6	0	0	0	0	0	0
577	1	Graduate degree	2	3	0	0	0	0	0	0	0	0	0	0	1	1	0	0	1	1	0	0	4	40	60	40	46.6667	5	6	4	4	5	6	4	3	4	5	5	6	5	4	4	5	0	0	1	0	0	0
823	2	Graduate degree	2	2	0	1	1	1	0	1	0	0	1	1	1	0	0	1	0	1	1	0	10	13	10	2	8.33333	5	6	6	6	6	6	6	6	6	6	6	6	6	6	6	6	1	0	1	0	0	0
9	2	Graduate degree	2	2	1	1	1	1	1	0	0	0	1	0	0	1	1	1	0	1	1	0	11	50	0	60	36.6667	4	4	2	2	1	3	4	5	4	2	4	3	4	3	5	4	1	1	0	0	0	0
311	2	Graduate degree	2	7	1	0	0	1	0	0	0	0	0	1	0	1	0	0	0	1	1	0	6	0	2	1	1	4	4	5	6	5	2	5	5	5	2	3	6	6	3	6	5	1	0	1	0	0	0
436	1	High school diploma or GED	1	4	1	0	0	1	0	0	1	0	0	0	0	0	1	0	0	0	0	0	4	40	60	30	43.3333	6	4	6	4	5	6	4	5	4	6	5	5	4	6	5	5	0	0	0	0	0	1
407	1	Graduate degree	2	1	0	0	0	1	1	0	0	0	0	0	0	1	0	0	1	0	0	1	5	80	80	80	80	6	5	4	5	6	5	4	5	5	6	5	4	5	6	5	5	0	0	0	0	0	0
989	2	High school diploma or GED	1	4	1	0	0	1	0	1	0	0	0	1	0	1	1	0	0	1	0	0	7	10	5	0	5	5	4	5	3	5	1	5	6	2	3	6	5	6	4	5	6	0	0	0	0	0	0
292	2	Graduate degree	2	2	1	0	1	1	0	0	0	1	1	1	1	1	1	0	0	1	1	0	11	1	1	10	4	5	6	2	3	1	1	2	3	4	1	4	5	6	2	4	1	1	0	1	0	0	0
516	2	Graduate degree	2	2	1	0	0	0	0	0	0	0	0	1	0	1	0	0	0	0	1	0	4	5	5	0	3.33333	6	6	4	4	5	2	5	6	6	4	6	6	5	6	5	4	1	0	0	0	0	0
403	2	Graduate degree	2	1	1	0	0	0	0	0	0	0	0	0	1	0	0	0	0	0	1	0	3	80	80	70	76.6667	6	5	6	5	6	5	4	6	6	6	5	4	5	6	5	4	0	0	1	0	0	0
401	1	Bachelor's degree	2	1	0	0	0	1	0	0	0	0	0	0	1	0	0	0	0	0	0	0	2	90	80	80	83.3333	6	5	6	6	5	6	6	6	5	5	6	6	5	5	6	6	0	0	1	0	0	0
372	1	Bachelor's degree	2	2	0	0	1	1	0	0	0	0	1	0	0	1	1	0	0	1	1	0	7	0	0	0	0	4	5	4	4	4	4	5	4	5	5	4	5	4	5	5	4	1	0	1	0	0	0
6	1	High school diploma or GED	1	1	1	0	0	0	0	0	1	0	0	0	0	0	0	1	0	0	0	0	3	0	0	0	0	2	2	2	2	2	2	2	2	3	2	2	2	2	2	2	2	0	0	0	0	0	0
420	1	Associate's degree	2	2	0	0	1	0	0	0	0	0	1	0	0	0	0	1	1	0	0	0	4	2	5	10	5.66667	4	5	4	3	4	3	3	4	4	5	5	3	3	3	5	5	1	0	0	0	0	0
647	1	Bachelor's degree	2	7	0	1	1	1	0	0	0	0	0	1	1	0	0	0	1	0	1	0	7	50	29	29	36	5	4	6	4	3	5	6	4	3	5	6	5	3	2	4	4	0	0	0	0	0	1
817	1	Bachelor's degree	2	3	1	0	0	0	0	0	0	0	0	0	0	0	0	0	0	0	0	1	2	50	50	50	50	6	6	6	6	6	6	6	6	6	6	6	6	6	6	6	6	1	0	1	0	0	0
785	2	Bachelor's degree	2	2	0	0	1	1	0	0	0	1	1	1	1	1	0	0	0	1	1	1	10	30	55	30	38.3333	5	6	1	4	4	1	6	6	6	3	6	6	6	6	6	1	1	0	1	0	0	0
675	1	Graduate degree	2	6	0	0	0	1	0	0	0	0	0	0	0	0	0	0	0	0	0	1	2	0	2	0	0.666667	5	5	5	5	6	4	5	4	5	4	4	4	5	3	4	4	0	0	0	0	0	0
978	2	Graduate degree	2	4	0	0	1	1	0	0	1	1	1	1	1	0	0	0	0	1	0	1	9	5	5	15	8.33333	4	4	4	4	4	3	5	4	4	4	4	4	4	4	4	4	1	1	1	1	1	1
83	1	Graduate degree	2	7	1	0	0	1	0	0	0	0	0	1	1	1	0	1	0	1	1	0	8	10	10	50	23.3333	3	6	4	5	6	1	6	5	5	4	1	6	6	5	6	6	1	0	0	0	0	0
844	1	Graduate degree	2	1	0	0	1	1	0	0	0	1	1	0	1	0	1	0	0	1	1	0	8	10	5	5	6.66667	5	4	4	5	6	2	6	6	5	4	6	6	6	6	4	4	0	0	0	0	0	0
492	2	High school diploma or GED	1	2	1	1	0	1	0	0	0	1	0	0	1	0	1	0	0	0	0	0	6	75	65	50	63.3333	6	4	4	5	6	4	4	3	5	5	6	6	6	4	6	4	0	0	1	0	0	0
106	2	Some college (no degree)	1	4	1	0	0	0	0	0	1	0	0	1	0	0	0	0	0	0	0	0	3	0	0	0	0	6	6	6	6	6	6	6	6	4	3	6	4	3	4	6	5	0	0	0	0	0	0
547	1	Some college (no degree)	1	1	1	0	0	0	0	0	0	0	0	0	1	1	0	0	0	1	1	0	5	10	10	10	10	4	4	6	2	2	5	4	4	4	5	5	4	4	4	4	4	0	0	0	0	0	0
661	1	Graduate degree	2	5	1	0	0	1	0	1	0	0	0	0	1	1	1	1	0	1	0	0	8	0	10	0	3.33333	5	5	3	3	3	1	2	2	2	1	1	3	4	2	2	1	1	1	1	1	0	0
42	1	Bachelor's degree	2	4	1	0	0	1	0	0	0	1	1	1	0	0	0	0	0	1	1	0	7	0	0	1	0.333333	4	4	4	4	4	4	4	4	4	4	4	4	4	4	4	4	1	0	0	0	0	0
828	1	Graduate degree	2	4	1	0	0	1	0	1	0	1	1	0	0	1	1	0	0	1	1	1	10	10	10	10	10	4	4	2	2	2	1	1	1	1	1	1	1	1	1	1	1	0	0	1	0	1	0
225	2	Bachelor's degree	2	2	0	0	0	1	0	0	0	0	0	0	1	0	0	0	0	0	0	0	2	35	75	3	37.6667	6	4	4	4	5	5	5	5	6	6	6	6	6	6	6	5	0	0	0	0	0	0
460	2	Graduate degree	2	4	1	0	0	0	0	0	0	0	1	1	1	1	0	0	0	1	0	0	6	0	0	0	0	5	5	3	4	4	1	5	5	3	2	3	5	5	2	5	3	1	1	1	0	0	0
788	1	Graduate degree	2	4	0	0	0	1	0	0	1	0	0	0	1	0	0	0	0	0	0	0	3	50	60	80	63.3333	5	5	4	4	3	3	4	5	5	4	4	5	5	5	5	5	0	0	0	0	0	0
948	1	Bachelor's degree	2	6	1	0	0	1	0	0	0	0	1	1	0	0	0	1	0	0	1	0	6	55	44	32	43.6667	5	6	6	5	6	6	6	5	6	6	6	6	6	5	5	6	0	0	1	0	0	0
587	2	Bachelor's degree	2	2	0	0	0	1	0	0	0	0	1	1	1	0	0	0	0	0	0	0	4	10	20	5	11.6667	3	4	4	5	4	4	5	4	1	5	5	5	4	4	6	3	1	0	1	1	1	0
934	2	High school diploma or GED	1	1	1	0	0	0	0	0	0	0	0	1	0	1	1	1	0	0	0	0	5	50	60	30	46.6667	5	4	5	5	5	1	3	6	5	5	1	5	1	4	4	1	0	0	0	0	0	0
457	2	Graduate degree	2	5	0	0	0	1	0	0	0	0	0	0	0	1	0	0	0	0	0	0	2	10	10	50	23.3333	5	5	5	5	5	1	5	5	2	2	5	5	5	2	2	3	1	0	1	0	0	0
737	1	High school diploma or GED	1	4	1	1	1	1	0	0	0	1	1	1	1	0	0	0	0	0	0	0	8	0	0	1	0.333333	5	5	5	5	5	5	5	5	5	5	5	5	5	5	5	4	1	1	1	1	0	0
423	2	High school diploma or GED	1	2	1	0	1	1	0	0	0	1	1	1	0	1	1	1	0	1	1	0	11	15	10	25	16.6667	4	4	4	4	4	4	4	4	4	4	4	4	4	4	4	4	0	0	0	0	0	0
28	1	High school diploma or GED	1	2	1	0	0	1	0	1	0	1	1	1	0	1	0	1	0	1	1	1	11	30	40	5	25	5	5	2	4	5	1	5	5	4	2	3	5	6	4	5	2	1	1	1	0	1	0
233	1	Some college (no degree)	1	1	0	0	0	0	0	0	1	0	1	0	0	0	0	0	0	0	0	0	2	20	30	30	26.6667	1	5	4	4	6	5	3	6	5	3	5	4	4	5	5	5	0	0	0	0	0	0
960	2	Some college (no degree)	1	4	0	1	0	0	0	0	0	0	0	1	0	0	0	0	0	0	0	1	3	50	57	60	55.6667	5	3	4	2	4	6	6	4	5	4	4	5	5	6	5	5	1	0	1	0	0	0
17	2	Associate's degree	2	2	1	1	0	1	0	0	1	1	0	1	1	0	0	1	0	0	1	0	9	10	30	25	21.6667	4	5	6	2	2	3	6	2	1	6	3	2	4	4	2	4	0	0	0	0	0	0
779	2	Bachelor's degree	2	4	1	0	0	1	0	0	0	0	0	1	0	0	0	0	0	0	0	0	3	44	22	21	29	4	2	2	2	6	4	6	5	4	5	3	4	5	3	6	3	1	0	0	0	0	0
66	2	Graduate degree	2	3	1	1	0	0	0	1	0	1	1	1	0	0	0	0	0	0	0	0	6	5	5	20	10	4	5	2	2	3	1	1	2	3	2	4	5	5	2	3	3	1	1	0	0	0	0
821	1	Graduate degree	2	2	0	1	0	1	0	1	0	0	0	0	1	0	0	0	0	1	1	0	6	10	10	5	8.33333	6	6	4	4	5	1	5	4	4	2	4	5	4	4	4	5	1	0	0	0	0	0
245	2	Graduate degree	2	2	0	0	0	1	0	0	0	0	1	0	0	1	0	0	0	1	0	0	4	100	100	0	66.6667	5	5	5	5	5	5	5	5	4	5	5	5	5	5	5	5	0	0	0	0	0	0
501	2	High school diploma or GED	1	4	0	0	0	1	0	0	0	1	1	1	0	1	0	0	0	1	0	0	6	0	0	0	0	6	6	3	3	4	3	3	3	2	2	3	3	4	3	4	5	0	0	0	0	0	0
549	1	Some college (no degree)	1	1	1	0	0	0	0	0	1	1	0	1	0	0	0	0	0	1	0	0	5	30	20	20	23.3333	5	3	5	5	5	3	5	5	5	4	5	4	5	5	5	5	0	0	0	0	0	0
160	2	Graduate degree	2	6	0	0	0	1	0	0	0	0	1	1	0	1	1	0	0	1	0	0	6	5	1	3	3	3	4	5	5	5	4	5	4	5	5	4	4	4	4	5	5	0	0	1	0	0	0
598	2	Some college (no degree)	1	4	1	0	1	1	0	0	0	0	0	1	0	1	0	0	0	1	1	0	7	0	1	5	2	6	4	1	2	4	2	3	4	4	5	5	5	6	6	5	5	0	0	0	0	0	0
191	2	Graduate degree	2	4	0	0	0	1	0	0	0	0	0	0	0	0	0	0	1	0	1	1	4	20	25	20	21.6667	5	6	6	5	6	5	5	5	5	5	5	6	6	5	6	6	1	0	0	0	0	0
378	2	Associate's degree	2	6	1	0	0	1	0	0	1	0	0	1	1	0	0	0	0	1	1	0	7	5	10	10	8.33333	5	6	5	6	5	4	4	5	4	4	5	6	5	1	5	5	1	0	0	0	0	0
594	2	High school diploma or GED	1	4	1	0	0	1	0	0	0	0	1	1	1	0	0	0	0	0	0	0	5	0	0	5	1.66667	6	6	1	1	3	1	6	6	6	1	6	6	6	1	6	6	0	0	0	0	0	0
640	2	High school diploma or GED	1	4	0	0	0	1	0	0	0	0	0	0	0	0	1	0	0	0	1	0	3	5	10	5	6.66667	4	4	4	4	4	4	4	4	4	4	4	4	4	4	4	4	1	1	1	0	0	1
543	1	Graduate degree	2	6	0	0	1	0	0	0	0	1	1	0	1	1	0	0	0	1	0	0	6	5	0	10	5	4	4	4	4	4	1	4	4	4	4	4	4	4	4	4	5	1	1	1	1	0	0
175	2	Some college (no degree)	1	1	1	0	1	1	0	1	0	1	1	1	1	0	0	0	0	1	1	0	10	35	10	30	25	3	4	5	4	4	3	3	5	4	3	3	4	5	3	3	4	0	0	1	0	0	1
29	2	Some college (no degree)	1	5	1	1	1	1	0	0	0	1	1	1	1	1	0	0	0	1	1	0	11	5	5	100	36.6667	5	6	3	3	3	1	2	5	2	2	6	6	6	3	6	1	1	1	0	1	0	0
1035	1	Associate's degree	2	4	1	0	1	0	0	0	0	0	0	0	0	0	0	0	0	0	1	0	3	1	0	0	0.333333	2	2	3	3	4	3	5	4	3	6	2	2	5	3	3	5	1	0	0	0	0	0
147	2	Associate's degree	2	6	0	0	0	0	0	0	0	1	0	0	0	0	0	0	0	0	1	0	2	67	67	26	53.3333	3	4	4	5	4	3	4	3	3	4	3	4	5	3	4	4	0	0	0	0	0	0
625	1	Associate's degree	2	1	1	0	1	1	0	0	0	1	1	0	1	0	0	0	0	1	0	1	8	0.5	0.5	25	8.66667	5	6	1	1	1	1	6	6	1	1	6	6	6	6	5	1	1	1	0	0	0	0
839	1	Less than high school diploma	1	4	1	0	0	1	0	0	0	0	0	1	1	0	0	0	0	0	0	0	4	50	100	40	63.3333	4	5	5	5	3	5	6	3	6	6	6	5	4	3	3	4	0	0	1	0	0	0
154	1	High school diploma or GED	1	1	1	0	0	0	0	0	0	0	0	0	0	0	0	0	0	0	0	0	1	20	10	40	23.3333	2	1	1	3	5	1	6	1	1	1	4	1	1	5	1	1	0	0	0	0	0	0
651	2	High school diploma or GED	1	4	0	1	0	1	0	0	1	0	1	0	0	0	0	1	0	0	0	1	6	10	10	15	11.6667	3	5	5	5	4	4	2	2	4	2	2	2	6	5	4	2	1	0	0	0	0	1
8	1	High school diploma or GED	1	5	1	0	1	0	0	1	0	0	0	0	1	0	0	1	0	0	0	0	5	20	20	30	23.3333	3	3	3	3	4	4	3	2	3	5	2	3	1	2	2	1	0	0	0	0	0	0
1034	2	Graduate degree	2	3	1	0	0	1	1	0	0	0	1	0	1	1	0	0	0	1	1	0	8	10	10	20	13.3333	5	6	4	5	5	1	5	5	1	5	3	3	6	5	5	6	0	0	1	0	0	0
914	2	High school diploma or GED	1	5	1	1	0	1	0	0	0	0	0	1	0	1	1	1	0	1	1	0	9	30	10	30	23.3333	6	5	3	4	5	4	6	5	2	3	5	4	6	4	5	5	1	1	0	1	0	1
389	2	Graduate degree	2	1	0	1	1	0	0	0	0	1	0	0	0	0	0	0	0	0	0	0	3	80	75	10	55	6	6	6	6	6	4	6	6	5	4	6	6	6	6	4	6	0	0	0	0	0	0
35	1	Graduate degree	2	4	0	0	0	1	0	0	0	0	1	1	1	0	0	0	0	1	1	0	6	15	10	25	16.6667	4	6	5	6	6	2	6	6	6	6	4	6	6	6	6	6	1	1	1	1	0	0
86	2	High school diploma or GED	1	4	1	0	0	1	0	0	0	0	1	1	0	0	1	1	0	0	1	0	7	30	20	100	50	2	3	2	3	3	4	3	4	4	2	4	3	3	4	4	3	0	0	0	0	0	0
54	2	Some college (no degree)	1	1	1	0	0	1	0	0	0	1	0	0	0	1	0	0	0	0	0	0	4	10	10	5	8.33333	4	5	3	6	5	5	5	3	5	4	5	4	3	5	6	6	0	0	0	0	0	0
945	2	High school diploma or GED	1	6	0	0	0	0	0	0	0	1	0	1	0	1	0	0	0	1	0	0	4	13	21	19	17.6667	3	2	3	3	6	4	4	2	1	3	2	4	4	5	3	4	0	0	0	0	0	0
595	2	Graduate degree	2	4	1	0	1	1	0	0	0	1	1	1	1	0	0	0	0	1	0	1	9	5	5	1	3.66667	4	5	3	3	4	4	3	4	4	4	3	4	3	4	3	3	0	0	0	0	0	0
198	1	High school diploma or GED	1	1	1	0	0	1	0	0	0	1	1	1	0	1	0	0	0	1	1	1	9	0	0	1	0.333333	6	6	3	6	6	1	6	6	6	3	6	6	6	3	6	2	1	0	0	1	1	0
121	1	Graduate degree	2	4	0	0	0	1	0	0	0	0	1	1	0	1	1	0	0	1	1	0	7	0	0	0	0	6	6	5	6	6	1	6	6	6	6	6	6	6	6	6	6	0	0	0	0	0	0
695	2	Graduate degree	2	5	1	0	1	1	0	1	0	0	1	0	1	1	1	0	0	0	1	0	9	10	20	10	13.3333	4	5	3	6	5	2	5	3	2	5	5	5	6	5	6	5	1	0	0	0	0	0
659	1	Graduate degree	2	5	1	1	0	1	0	1	0	0	0	1	0	1	0	0	0	1	1	1	9	40	50	60	50	5	5	6	6	5	1	4	5	6	6	6	6	6	6	5	4	1	0	1	1	0	0
435	2	Some college (no degree)	1	2	1	0	0	1	0	0	0	0	1	0	0	0	0	1	0	0	1	1	6	0	0	50	16.6667	4	4	4	5	5	4	4	4	5	5	4	5	5	5	4	5	1	0	1	0	0	1
802	2	Graduate degree	2	6	1	0	0	1	0	0	0	1	0	1	0	0	1	0	0	0	1	0	6	50	75	100	75	5	5	5	5	5	5	5	5	5	5	5	5	5	5	5	5	0	0	0	0	0	0
277	2	Some college (no degree)	1	5	1	1	1	1	0	0	1	1	1	1	1	1	0	0	0	0	1	1	12	3	4	6	4.33333	1	3	1	4	5	1	1	4	4	1	5	5	6	4	4	1	1	1	1	1	1	0
814	2	Less than high school diploma	1	6	0	1	0	0	0	0	0	0	1	1	0	0	0	0	1	0	0	1	5	60	20	0	26.6667	3	3	4	5	4	5	3	4	3	2	5	4	3	6	6	4	0	0	1	1	1	0
36	1	High school diploma or GED	1	2	0	0	1	0	0	0	1	0	1	1	1	1	0	0	0	0	0	0	6	0	0	0	0	2	1	2	1	2	1	2	1	1	2	1	2	1	5	1	2	1	0	0	1	0	0
825	1	High school diploma or GED	1	6	1	1	0	1	0	0	0	1	1	1	1	1	0	1	0	0	1	1	11	5	10	35	16.6667	2	3	4	5	6	5	4	3	2	1	2	3	4	5	6	5	1	0	1	0	0	0
195	2	Graduate degree	2	6	1	0	1	0	0	1	0	1	1	1	1	1	1	0	0	1	0	0	10	5	10	15	10	4	4	4	4	4	3	4	5	3	4	6	6	5	3	5	5	1	0	1	1	0	0
683	2	Graduate degree	2	5	1	0	0	1	0	0	0	0	1	0	0	0	1	0	0	1	1	0	6	20	20	0	13.3333	5	6	5	5	5	4	5	5	5	4	5	5	6	4	4	6	0	1	1	0	0	0
[truncated: 38 more columns]
